# Supplementary material for: Fatty liver index and progression to type 2 diabetes: a 5-year longitudinal study in Spanish workers with pre-diabetes
Source: PubMed Central journal article supplement — BMJ Open. 2021 Aug 25;11(8):e045498. doi: 10.1136/bmjopen-2020-045498 (PMC8388308; doi:10.1136/bmjopen-2020-045498), 2021-08-25
Supplement: bmjopen-2020-045498.draft_revisions.pdf [file bmjopen-2020-045498.draft_revisions.pdf]

# BMJ Open

BMJ Open is committed to open peer review. As part of this commitment we make the peer review history of every article we publish publicly available.

When an article is published we post the peer reviewers' comments and the authors' responses online. We also post the versions of the paper that were used during peer review. These are the versions that the peer review comments apply to.

The versions of the paper that follow are the versions that were submitted during the peer review process. They are not the versions of record or the final published versions. They should not be cited or distributed as the published version of this manuscript.

BMJ Open is an open access journal and the full, final, typeset and author-corrected version of record of the manuscript is available on our site with no access controls, subscription charges or pay-per-view fees (<http://bmjopen.bmj.com>).

If you have any questions on BMJ Open's open peer review process please email [info.bmjopen@bmj.com](mailto:info.bmjopen@bmj.com)

# BMJ Open

## Fatty liver index and progression to type 2 diabetes in people with prediabetes

|                               |                                                                                                                                                                                                                                                                                                                                                                                                                                                                                                                    |
|-------------------------------|--------------------------------------------------------------------------------------------------------------------------------------------------------------------------------------------------------------------------------------------------------------------------------------------------------------------------------------------------------------------------------------------------------------------------------------------------------------------------------------------------------------------|
| Journal:                      | <i>BMJ Open</i>                                                                                                                                                                                                                                                                                                                                                                                                                                                                                                    |
| Manuscript ID                 | bmjopen-2020-045498                                                                                                                                                                                                                                                                                                                                                                                                                                                                                                |
| Article Type:                 | Original research                                                                                                                                                                                                                                                                                                                                                                                                                                                                                                  |
| Date Submitted by the Author: | 05-Oct-2020                                                                                                                                                                                                                                                                                                                                                                                                                                                                                                        |
| Complete List of Authors:     | Busquets-Cortés, Carla; University of the Balearic Islands, Nursing and Physiotherapy Department<br>Bennasar-Veny, Miquel; University of the Balearic Islands, Nursing and Physiotherapy Department<br>López-González, Angel-Arturo; Balearic Islands Health Services<br>Fresneda, Sergio; University of the Balearic Islands, Nursing and Physiotherapy Department<br>Aguiló, Antoni; University of the Balearic Islands<br>Yanez, Aina; University of the Balearic Islands, Nursing and Physiotherapy Department |
| Keywords:                     | DIABETES & ENDOCRINOLOGY, NUTRITION & DIETETICS, PRIMARY CARE                                                                                                                                                                                                                                                                                                                                                                                                                                                      |
|                               |                                                                                                                                                                                                                                                                                                                                                                                                                                                                                                                    |

SCHOLARONE™  
Manuscripts

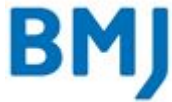

I, the Submitting Author has the right to grant and does grant on behalf of all authors of the Work (as defined in the below author licence), an exclusive licence and/or a non-exclusive licence for contributions from authors who are: i) UK Crown employees; ii) where BMJ has agreed a CC-BY licence shall apply, and/or iii) in accordance with the terms applicable for US Federal Government officers or employees acting as part of their official duties; on a worldwide, perpetual, irrevocable, royalty-free basis to BMJ Publishing Group Ltd ("BMJ") its licensees and where the relevant Journal is co-owned by BMJ to the co-owners of the Journal, to publish the Work in this journal and any other BMJ products and to exploit all rights, as set out in our [licence](#).

The Submitting Author accepts and understands that any supply made under these terms is made by BMJ to the Submitting Author unless you are acting as an employee on behalf of your employer or a postgraduate student of an affiliated institution which is paying any applicable article publishing charge ("APC") for Open Access articles. Where the Submitting Author wishes to make the Work available on an Open Access basis (and intends to pay the relevant APC), the terms of reuse of such Open Access shall be governed by a Creative Commons licence – details of these licences and which [Creative Commons](#) licence will apply to this Work are set out in our licence referred to above.

Other than as permitted in any relevant BMJ Author's Self Archiving Policies, I confirm this Work has not been accepted for publication elsewhere, is not being considered for publication elsewhere and does not duplicate material already published. I confirm all authors consent to publication of this Work and authorise the granting of this licence.

## Fatty liver index and progression to type 2 diabetes in people with prediabetes

Carla Busquets-Cortés,<sup>1,2</sup> Miquel Bannasar-Veny,<sup>1,3\*</sup> Arturo López-Gonzalez,<sup>2,4</sup> Sergio Fresneda,<sup>1,3</sup> Antoni Aguiló,<sup>1,3</sup> Aina M. Yáñez<sup>3,5</sup>

<sup>1</sup>Research Group on Evidence, Lifestyles & Health, Instituto de Investigación Sanitaria Illes Balears, Palma, Illes Balears, Spain

<sup>2</sup>Escuela Universitaria ADEMA, Palma, Spain

<sup>3</sup>Department of Nursing and Physiotherapy, Balearic Islands University, Palma, Illes Balears, Spain

<sup>4</sup>Prevention of Occupational Risks in Health Services, Balearic Islands Health Service, Palma, Spain

<sup>5</sup>Global Health and Human Development Research Group, Balearic Islands University, Palma, Illes Balears, Spain

**Corresponding author:** Miquel Bannasar-Veny, Nursing and Physiotherapy Department, Universitat de les Illes Balears, Cra. de Valldemossa km 7,5 Palma 07122, Spain. E-mail: [miquel.bannasar@uib.es](mailto:miquel.bannasar@uib.es) Telephone number: +34 971 172367

**Key words:** Conversion, Fatty Liver Index, Non-alcoholic Fatty Liver Disease, Fasting Plasma Glucose, Prediabetes, Type 2 Diabetes.

**Word count** (excluding title page, abstract, references, figures and tables): 3,338 words

## ABSTRACT

**Objective:** The main aim of the study was to evaluate the association between Non-alcoholic fatty liver disease (NAFLD), estimated by fatty liver index (FLI), and the development of type 2 diabetes (T2D) in a large cohort of adult workers with prediabetes.

**Design:** Prospective cohort study.

**Setting:** Occupational health services from Spain.

**Participants:** 16,648 adult workers (aged 20 to 65 years) with prediabetes (fasting plasma glucose (FPG) of 100-125 mg/dl).

**Outcome and measures:** FLI was calculated based on measurements of triglycerides, body mass index, waist circumference and  $\gamma$ -glutamyltransferase. The population was classified into three categories: FLI <30 (no hepatic steatosis), FLI 30–59 (intermediate status), and FLI >60 (hepatic steatosis). Sociodemographic, anthropometric, dietary habits, physical activity and clinical data were collected from all subjects. The incidence rate of T2D was determined after 5 years of follow-up.

**Results:** After 5 years of follow-up, 3,706 of the 16,648 participants (22.2%) were diagnosed with T2D, corresponding to an annual rate of progression of 4.5%. FLI was strongly associated with T2D conversion. The incidence rates of T2D in the FLI<30, FLI 30-59 and FLI>60 groups after 5 years of follow-up were 19/6,421 (0.3%), 338/4,318 (7.8%) and 3,349/5,909 (56.7%), respectively. This association remained significant (OR = 6.16; 95% CI 5.22 to 7.26) for FLI>60 after adjustment for sex, age, diet, lifestyle and blood pressure.

**Conclusion:** NAFLD assessed by FLI independently predicted the risk of conversion to T2D among people with prediabetes. FLI may be an easily determined and valuable early predictor for T2D in people with prediabetes. FLI-based assessment of NAFLD in subjects with prediabetes in routine clinical practice could allow the adoption of effective measures to prevent and reduce their progression to T2D.

### Strengths and limitations of this study

- This is a prospective study, with large sample size and 5-years follow-up.
- Study participants had multiple occupations and were from several geographical locations.
- Fatty liver index used as a surrogate of fatty liver does not detect progression of fatty liver disease.
- Lifestyle modifications of study participants were not evaluated throughout the 5-year follow-up

## INTRODUCTION

Type 2 Diabetes (T2D) is closely associated with a constellation of metabolic comorbidities, including obesity, hypertension, hypercholesterolemia, dyslipidemia and non-alcoholic fatty liver disease (NAFLD).[1] The main characteristic of NAFLD is the infiltration of hepatocytes by free fatty acids and triglycerides not related to significant alcohol intake. NAFLD is an entity that encompasses a wide spectrum of lesions ranging from indolent liver fat storage followed by lipotoxicity,[2] to hepatic inflammation, also known as non-alcoholic steatohepatitis (NASH). NAFLD is the most common chronic liver disease worldwide that is associated with excess health-related expenditures, making it a community health problem.[3] The estimated overall worldwide prevalence of NAFLD in the general adult population is about 25–30%,[3,4] but ranges from 40%–70% in subjects with established T2D.[5,6] In fact, NAFLD and T2D are conditions that frequently coexist and can act synergistically to drive adverse outcomes.[7] NAFLD is considered the hepatic manifestation of metabolic syndrome (MetS)[8] because epidemiological studies have consistently shown that NAFLD is strongly linked to obesity, dyslipidemia, and insulin resistance.[9,10] Therefore, NAFLD is thought to be an independent risk factor for incident T2D[7] and cardiovascular disease.[11]

Liver biopsy is currently the gold standard for diagnosing progressive NAFLD.[12] Biopsies are invasive procedures with several drawbacks, including sampling error, interobserver variability, high cost, patient discomfort and risk of complications.[5] Moreover, obtaining liver biopsies from all patients with NAFLD is unrealistic. Abdominal ultrasonography is a simple, inexpensive, widely available and minimally invasive technique that is used to diagnose fatty liver in most subjects. However, its sensitivity is low in subjects with fatty retention less than 20%–30% and it does not provide information on the degree of fibrosis.[13] Consequently, attempts have been made to diagnose NAFLD/NASH using clinical and laboratory-based biomarkers and scoring systems that can predict fatty changes in the liver. These indices for the diagnosis of NAFLD/NASH include the fatty liver index (FLI),[14] NAFLD liver fat score,[15] the hepatic steatosis index (HSI),[16] the ALD/NAFLD index (ANI),[17] the lipid accumulation product (LAP)[18] and the SteatoTest (ST).[19] These indices require the measurement of patient characteristics, including concentrations of triglycerides (TG),  $\gamma$ -glutamyl transpeptidase (GGT), aspartate aminotransferase (AST), alanine transaminase (ALT), insulin, body mass index (BMI), waist circumference (WC), gender,

1  
2  
3 mean corpuscular value and presence or absence of T2D or metabolic syndrome.[20] The  
4 FLI is a simple and accurate algorithm that combines routine measurements of TG and  
5 GGT concentrations, WC and BMI, showing an excellent discriminative ability to predict  
6 ultrasonographic NAFLD and hepatic steatosis in the general population.[14,21]  
7  
8  
9

10  
11 The FLI has been reported to correlate with: 1) insulin resistance; 2) risk of  
12 coronary heart disease; 3) MetS; 4) early atherosclerosis; and 5) rates of non-hepatic-  
13 related morbidity and mortality in nondiabetic subjects.[22] Thus, FLI-diagnosed  
14 NAFLD may be an indicator of incident T2D.[10] Nonetheless, the risk of progression to  
15 T2D determined by FLI in patients with prediabetes remains poorly understood.  
16 Determining FLI in subjects with prediabetes may be highly relevant, as both  
17 epidemiological and clinical evidence have shown that primary health care prevention  
18 programs should target people at greater risk of developing T2D. The present study was  
19 therefore designed to evaluate the association between NAFLD, as estimated by FLI, and  
20 the development of T2D in a large cohort of South-European Mediterranean workers with  
21 prediabetes.  
22  
23  
24  
25  
26  
27  
28  
29  
30  
31  
32  
33

## 34 **Methods**

### 35 **Study population and design**

36  
37 This cohort study included 16,648 Spanish working adults with prediabetes who worked  
38 in public administration, construction, health departments or post offices. The study  
39 methods have been described in detail previously.[23] Briefly, participants were carefully  
40 chosen from 234,995 potentially eligible individuals who underwent periodic  
41 occupational health assessments between 2012 and 2013. Participants were included if  
42 they were aged 20–65 years and had an FPG of 100–125 mg/dL.[24] Subjects were  
43 excluded if they had a history of physician-diagnosed diabetes, had been treated with an  
44 oral antidiabetic agent or a systemic glucocorticoid, had an FPG  $\geq 126$  mg/dL or an  
45 HbA1c  $\geq 6.5\%$  at baseline, had received cancer treatment during the preceding 5 years,  
46 had anemia (hematocrit  $< 36\%$  in men and  $< 33\%$  in women) or were pregnant. All subjects  
47 underwent standard health examinations, anthropometric measurements, and metabolic  
48 tests at baseline and were followed-up 5 years later, in 2017 and 2018.  
49  
50  
51  
52  
53  
54  
55  
56  
57  
58  
59  
60



1  
2  
3 All the procedures in the study protocol were in accordance with the Declaration  
4 of Helsinki for research on human participants and were approved by the Balearic Islands  
5 Ethical Committee of Clinical Research (Ref. No: CEI-IB-1887). All participants were  
6 carefully informed of the purpose and demands of the study. Informed consent was  
7 obtained from all participants included in the study.  
8  
9  
10  
11  
12

### 13 **Patient and public involvement**

14  
15 People were not involved in setting the research question nor in the study design.  
16 Participants were interviewed face to face by trained researchers for a detailed  
17 explanation of the purpose of this research and informed consent at the beginning. Results  
18 of the research will be disseminated to the participants.  
19  
20  
21  
22

### 23 **Data collection**

24  
25 At baseline, anthropometric measurements and fasting blood sample were taken from all  
26 subjects during occupational health examinations. A questionnaire was administered to  
27 collect data on sociodemographic characteristics, dietary habits, physical activity (PA)  
28 and clinical data. Participants were asked to report if they performed moderate and/or  
29 vigorous exercise (at least 150 min/week, according to World Health Organization  
30 [WHO] recommendations) and if they consumed fruits and vegetables daily. Each  
31 individual was also categorized as a smoker, former smoker, or never smoker. Social class  
32 was defined using the Spanish Epidemiology Society classification, which is based on  
33 occupation and it has shown high correlation with level of education.[25] Class I (upper  
34 class) includes executives, managers, and university professionals; Class II (middle class)  
35 includes intermediate occupations and employees; and Class III (lower class) includes  
36 manual workers.  
37  
38  
39  
40  
41  
42  
43  
44  
45  
46  
47

48 All anthropometric measurements were made in the morning, after an overnight  
49 fast, at the same time and according to the guidelines and recommendations in the  
50 International Standards for Anthropometric Assessment (ISAK) manual.[26] All  
51 measurements were performed by well trained technicians or researchers to minimize  
52 coefficients of variation. Body weight was measured to the nearest 0.1 kg using an  
53 electronic scale (Seca 700 scale, Hamburg); height was measured to the nearest 0.5 cm  
54 using a stadiometer (Seca 220) Telescopic Height Rod for Column Scales, Hamburg);  
55 and BMI was calculated as weight (kg) divided by height (m) squared (kg/m<sup>2</sup>). Obesity  
56  
57  
58  
59  
60

1  
2  
3 was defined as BMI  $\geq 30.0$  kg/m<sup>2</sup>, in agreement with WHO guidelines. Blood pressure  
4 was measured after a resting period of 10 minutes, with the subject in the supine position,  
5 using an electric and calibrated sphygmomanometer (OMRON M3, Healthcare Europe,  
6 Spain). Blood pressure in each subject was measured three times with a one-minute gap  
7 between measurements and their average was calculated.  
8  
9  
10  
11

12  
13 Venous blood samples were taken from the antecubital vein of each subject in a  
14 sitting position, in the morning after a 12 h overnight fast. Blood samples were collected  
15 in suitable vacutainers without anticoagulant to obtain serum. Serum concentrations of  
16 glucose, TG and cholesterol were measured by standard procedures using a Beckman  
17 Coulter SYNCHRON CX® 9 PRO clinical system (La Brea, CA, USA).  
18  
19  
20  
21

22 Incident T2D was defined as FPG  $\geq 126$  mg/dl, or the initiation of anti-  
23 hyperglycemic medications for diabetes control during the follow-up period.  
24  
25  
26

### 27 **FLI as a surrogate measure of fatty liver**

28  
29 The FLI was calculated based on measurements of TG, GGT, BMI and WC, using the  
30 formula[14]:  
31  
32

$$33 \text{ Fatty Liver Index (FLI)} = e^y / (1 + e^y) \times 100$$

$$34 \text{ Where } y = 0.953 \times \ln(\text{TG}) + 0.139 \times \text{BMI} + 0.718 \times \ln(\text{GGT}) + 0.053 \times \text{WC} - 15.745$$

35  
36  
37  
38 Here, TG indicates triglyceride concentration, measured as mg/dl; BMI indicates  
39 body mass index, measured as kg/m<sup>2</sup>; GGT indicates  $\gamma$ -glutamyl transpeptidase,  
40 measured as U/l; and WC indicates waist circumference, measured as cm.  
41  
42  
43

44 FLI, which ranges from 0 to 100, has shown good diagnostic accuracy in detecting  
45 fatty liver, with an Area Under the Curve (AUC) of 0.85 and a 95% confidence interval  
46 (CI) of 0.81–0.88.[10,14] FLI  $< 30$  was found to rule out steatosis with a sensitivity of  
47 87% and a specificity of 64%, whereas FLI  $> 60$  was indicative of the presence of steatosis  
48 with a sensitivity of 61% and specificity of 86%.[14] FLI scores have been validated by  
49 comparison with the results of liver ultrasound and nuclear magnetic resonance  
50 spectroscopy. An FLI of 30–60 indicated indeterminate risk, in which fatty liver could  
51 not be ruled in or out.  
52  
53  
54  
55  
56  
57  
58

### 59 **Statistical analyses**

1  
2  
3 Continuous variables were expressed in means ( $\pm$ SDs) and compared by Student's t-test,  
4 whereas categorical variables were expressed as n (%) and compared by chi-square ( $\chi^2$ )  
5 tests. Multivariate logistic regression analyses were performed to calculate odds ratios  
6 (ORs) for the development of diabetes, adjusting for potential confounders that showed  
7 significant association in univariate analysis. For this analysis participants were classified  
8 into two categories: those with  $FLI \geq 60$  and  $FLI < 60$ . The statistical method of receiver  
9 operating characteristic (ROC) curves was used to determine the FLI breakpoint. The  
10 optimal cut-off scores and the values of sensitivity and specificity for maximum accuracy  
11 were calculated according to Youden index.[27]  
12  
13  
14  
15  
16  
17  
18  
19

20 All analyses were performed using the Statistical Package for the Social Sciences  
21 (SPSS) version 25.0 (IBM Company, New York, NY, USA) for Windows. All statistical  
22 tests were two-sided, and p values  $< 0.05$  were considered statistically significant.  
23  
24  
25  
26  
27

## 28 RESULTS

29  
30  
31 Baseline demographic and anthropometric characteristics of the study subjects by  
32 NAFLD are shown in Table 1. The sample included 16,648 individuals with prediabetes,  
33 comprised of 12,080 (72.6%) men and 4,568 (27.4%) women, of mean age  $44.81 \pm 9.91$   
34 years. The prevalence of obesity in the entire sample was 26.9%. The percentage of men  
35 was significantly higher among subjects with than without NAFLD. There were also  
36 significant differences in all anthropometrical and biochemical parameters analyzed, with  
37 BMI, WC, TG, fasting plasma glucose (FPG), cholesterol, GGT and SBP and DBP being  
38 significantly higher in subjects with than without NAFLD. The percentages of subjects  
39 who performed at least 150 min per week of PA (4.3% vs. 61.8%;  $p < 0.001$ ) and who did  
40 not consume fruits and vegetables every day (12.0% vs. 56.4%;  $p < 0.001$ ) were  
41 significantly lower in subjects with than without NAFLD.  
42  
43  
44  
45  
46  
47  
48  
49  
50  
51  
52  
53  
54  
55  
56  
57  
58  
59  
60

**Table 1** Anthropometric characteristics and biochemical parameters of subjects with and without NAFLD at baseline

| Characteristics                    | Total<br>(n = 16,648) | FLI $\geq$ 60<br>(n = 5,909) | FLI <60<br>(n = 10,739) | P value |
|------------------------------------|-----------------------|------------------------------|-------------------------|---------|
| Age (years)                        | 44.8 $\pm$ 9.91       | 43.5 $\pm$ 10.3              | 46.3 $\pm$ 8.9          | < 0.001 |
| Sex (male)                         | 12,080 (72.6%)        | 4,917 (83.2%)                | 713 (66.7%)             | < 0.001 |
| Social class                       |                       |                              |                         | 0.074   |
| I                                  | 741 (4.5%)            | 239 (4.0%)                   | 502 (4.7%)              |         |
| II                                 | 2,779 (16.7%)         | 961 (16.3%)                  | 1,818 (16.9%)           |         |
| III                                | 13,128 (78.9%)        | 4,709 (79.7%)                | 8,419 (78.4%)           |         |
| BMI (kg/m <sup>2</sup> )           | 27.9 $\pm$ 4.88       | 32.0 $\pm$ 4.4               | 25.3 $\pm$ 3.0          | < 0.001 |
| BMI categories                     |                       |                              |                         | < 0.001 |
| Normal weight                      | 5,049 (30.3%)         | 83 (1.4%)                    | 4,966 (46.2%)           |         |
| Overweight                         | 7,120 (42.8%)         | 1,888 (32.0%)                | 5,232 (48.7%)           |         |
| Obese                              | 4,479 (26.9%)         | 3,938 (66.6%)                | 541 (5.0%)              |         |
| WC (cm)                            | 87.3 $\pm$ 10.58      | 95.1 $\pm$ 7.3               | 82.5 $\pm$ 8.2          | < 0.001 |
| Triglycerides (mg/dL)              | 139.8 $\pm$ 110.67    | 197.8 $\pm$ 146.2            | 104.6 $\pm$ 52.0        | < 0.001 |
| Glucose (mg/dL)                    | 108.4 $\pm$ 8.51      | 112.9 $\pm$ 12.4             | 100.8 $\pm$ 7.6         | < 0.001 |
| Cholesterol (mg/dL)                | 203.9 $\pm$ 38.61     | 212.0 $\pm$ 38.7             | 197.1 $\pm$ 36.7        | < 0.001 |
| GGT (U/l)                          | 45.6 $\pm$ 54.5       | 72.7 $\pm$ 76.3              | 28.5 $\pm$ 24.0         | < 0.001 |
| SBP (mmHg)                         | 128.1 $\pm$ 17.3      | 134.2 $\pm$ 16.9             | 124.4 $\pm$ 15.6        | < 0.001 |
| DBP (mmHg)                         | 78.4 $\pm$ 11.2       | 82.5 $\pm$ 10.9              | 76.0 $\pm$ 10.3         | < 0.001 |
| PA ( $\geq$ 150 min/week)          | 6,892 (41.4%)         | 256 (4.3%)                   | 6,636 (61.8%)           | < 0.001 |
| Diet (daily fruits and vegetables) | 6,771 (40.7%)         | 709 (12.0%)                  | 6,060 (56.4%)           | < 0.001 |
| Smoking habit                      |                       | 1,791 (30.3%)                | 3,663 (34.1%)           | < 0.001 |
| Never                              | 7,645 (45.9%)         | 2,599 (44.0%)                | 5,046 (47.0%)           |         |
| Former                             | 3,549 (21.3%)         | 1,519 (25.2%)                | 2,030 (18.9%)           |         |
| Current                            | 5,454 (32.8%)         | 1,791 (30.3%)                | 3,663 (34.1%)           |         |

Results are reported as mean  $\pm$  SD or n (%). BMI, body mass index; WC, waist circumference; GGT,  $\gamma$ -glutamyl transpeptidase; SBP, systolic blood pressure; DBP, diastolic blood pressure PA, physical activity.

1  
2  
3 Baseline FLI showed a significant correlation with FPG concentration at 5 years' follow-  
4 up with a Pearson's correlation coefficient of 0.528 ( $p < 0.0001$ ) (Figure 1).  
5  
6  
7  
8  
9

10 **Figure 1** Correlation of Baseline FLI and FPG after 5 years of follow-up.  
11  
12  
13  
14

15 Of the 16,648 subjects with prediabetes, 3,706 (22.2%) progressed to T2D at 5 years,  
16 corresponding to an annual rate of 4.5%. Rates of T2D development according to the  
17 three baseline FLI categories are shown in Figure 2. The incidence of T2D after 5 years  
18 was 19/6,421 (0.30%) in the low risk group (FLI  $< 30$ ), corresponding to an annual rate  
19 of 0.05%. In the intermediate risk group (FLI 30–59), the incidence of T2D after 5 years  
20 was 338/4,318 (7.83%), corresponding to an annual rate of 1.57%. The incidence of T2D  
21 in the high-risk group (FLI  $> 60$ ), was 3,349/5,909 (56.7%), corresponding to an annual  
22 rate of 11.3% (Figure 2).  
23  
24  
25  
26  
27  
28  
29

30 **Figure 2** Incidence of T2D after 5 years of follow-up based on baseline FLI classification.  
31  
32  
33  
34  
35

36 In bivariate analysis (Table 2), high FLI ( $> 60$ ) was strongly associated with progression  
37 to T2D (OR = 38.04; 95% CI 33.83 to 42.78), as were age, BMI, smoking habits and  
38 SBP. An adjusted binomial logistic regression model showed that high FLI ( $> 60$ )  
39 remained independently associated with conversion to T2D (adjusted OR = 6.05; 95% CI  
40 5.12 to 7.15). Most of the evaluated factors also remained significant after adjustment.  
41 Performing at least 150 min/week of physical activity (aOR = 0.17; 95% CI 0.12 to 0.23)  
42 and daily consumption of fruits and vegetables (aOR = 0.73; 95% CI 0.61 to 0.86) were  
43 significantly protective against conversion to T2D. Current smokers were also less likely  
44 to convert to T2D (aOR = 0.85; 95% CI 0.74 to 0.97).  
45  
46  
47  
48  
49  
50  
51  
52  
53  
54  
55  
56  
57  
58  
59  
60

**Table 2** Odds ratio for conversion from prediabetes to T2D

| Variables                          | OR <sub>crude</sub> (95% CI) | OR <sub>adjusted</sub> (95% CI) |
|------------------------------------|------------------------------|---------------------------------|
| Age                                | 1.06 (1.05 - 1.06)           | 1.10 (1.09 - 1.11)              |
| Men (Ref: women)                   | 1.03 (0.95 - 1.11)           | 1.75 (1.49 - 2.06)              |
| Social class (Ref: I)              |                              |                                 |
| II                                 | 0.86 (0.75 - 1.03)           | 0.77 (0.56 - 1.05)              |
| III                                | 0.96 (0.87 - 1.06)           | 0.79 (0.59 - 1.05)              |
| PA ( $\geq 150$ min/week)          | 0.01 (0.01 - 0.02)           | 0.17 (0.12 - 0.23)              |
| Diet (daily fruits and vegetables) | 0.13 (0.11 - 0.14)           | 0.73 (0.61 - 0.86)              |
| Smoking habits (Ref: never smoker) |                              |                                 |
| Former                             | 1.42 (1.30 - 1.55)           | 0.99 (0.85 - 1.15)              |
| Current                            | 0.72 (0.66 - 0.79)           | 0.85 (0.74 - 0.97)              |
| BMI                                | 1.72 (1.69 - 1.75)           | 1.55 (1.51 - 1.59)              |
| SBP                                | 1.03 (1.02 - 1.04)           | 1.00 (0.99 - 1.00)              |
| FPG                                | 1.08 (1.07 - 1.09)           | 1.09 (1.08 - 1.10)              |
| FLI $>60$                          | 38.04 (33.83 - 42.78)        | 6.05 (5.12 - 7.15)              |

PA, physical activity; BMI, body mass index; SBP, systolic blood pressure; FLI, fatty liver index; FPG, fasting plasma glucose.

Our results indicated the FLI was the strongest predictor of progression to T2D. In particular, participants who progressed to T2D had significantly higher scores of FLI than those who did not (Figure 3). ROC curves showed that FLI level had better predictive performance (AUC = 0.922 [95% CI 0.918 to 0.926]) for T2D progression than FPG (AUC = 0.629 [95% CI 0.618 to 0.639]). The optimal cut-off score for maximum accuracy for FLI was 59.5 and provides a sensitivity of 90.4% (95% CI 89.4 to 91.3) and a specificity of 80.2% (95% CI 79.5 to 80.9).

**Figure 3** ROC curves for the prognostic value of FLI and FPG in predicting progression from prediabetes to diabetes after 5 years.

## DISCUSSION

The present study evaluated the association of hepatic steatosis with progression to T2D in a large and representative sample of South-European Mediterranean workers with prediabetes. The study found that FLI-diagnosed NAFLD was strongly associated with conversion to T2D and that FLI, as a simple surrogate indicator of hepatic steatosis, could identify subjects at high risk for T2D conversion. The risk factors for progression to T2D in subjects with prediabetes include hepatic steatosis and less than 150 min/week of physical activity. Identification of subjects who could benefit from preventive strategies represents an opportunity to assist vulnerable individuals to understand their risk to progression to T2D and encourage them to take steps to reduce this risk. This prospective study of workers with prediabetes showed that FLI-diagnosed hepatic steatosis increased the risk of developing T2D after 5 years of follow-up. Certainly, in terms of FLI values, we found a cut-off for T2D conversion of 59.5, which is very similar to the cut-off of 60 for predicting NAFLD. Furthermore, the sensibility and specificity for progression to T2D with both cutoffs are exactly the same (data not shown), and showed a high accuracy (sensitivity 90.4% and specificity 80.2%). Furthermore, this study found that older age, male sex, higher BMI, physical inactivity and low-quality diet were independent risk factors for progression to diabetes.

FLI may be an appropriate indicator of NAFLD in clinical practice, as it includes simple anthropometric (BMI and WC) and biochemical (TG and GGT) measurements. The results of the present study are in accordance with previous studies that assessed the incidence of T2D in smaller populations of individuals from Japan[28] and Spain[5] with prediabetes and FLI-diagnosed NAFLD. Those studies reported that NAFLD is a strong predictor of T2D in subjects with prediabetes. Similarly, the present study found that FLI was the strongest predictor of T2D progression among people with prediabetes.

The baseline prevalence of hepatic steatosis (i.e. FLI>60) in our study population was 35.4%, higher than the 19.3% reported in a Japanese study,[28] but closer to the approximately 22–40% reported by studies using ultrasonography-diagnosed NAFLD.[29,30] However, the prevalence that we observed was lower than the 55.7% observed in the PREDAPS study.[5] Notably, 66.6% of people with NAFLD in our population were obese, whereas 32.0% were overweight. It has been previously described



1  
2  
3 a comparison of NAFLD patients with and without diabetes found that the components  
4 of MetS, including central obesity, high TG levels and hypertension, were more frequent  
5 in subjects with diabetes.[31]  
6  
7

8  
9 A study performed in France reported that FLI >70 was associated with the  
10 development of T2D.[32] Similarly, we found that FLI >60 could predict the  
11 development of T2D in subjects with impaired glucose metabolism. Metabolic profiles  
12 also differed in subjects with FLI>60 and FLI<30, with components of the MetS and other  
13 metabolic parameters, such as BMI, WC, TG, glucose, cholesterol, GGT and SBP, being  
14 higher in subjects with FLI>60. These results are also in good agreement with those of  
15 studies in patients with prediabetes[28] and previously established T2D.[33] The degree  
16 of liver fat content was found to correlate with all components of the MetS.[34] This  
17 correlation may be due to NAFLD and T2D sharing a series of common  
18 physiopathological functions. Although the mechanisms leading to NAFLD and its  
19 progression to NASH and liver injury remain incompletely understood, they include  
20 alterations in glucose and lipid metabolism, insulin resistance, insulin secretion and a  
21 genetic predisposition. Environmental factors are also involved, including exposure to  
22 endocrine disruptors, epigenetic factors, and lifestyle alterations. The same mechanisms  
23 are involved in the development of T2D.[33,35]  
24  
25  
26  
27  
28  
29  
30  
31  
32  
33  
34  
35

36 Nearly one in four individuals (22.2%) with prediabetes in the present study  
37 progressed to T2D after 5 years of follow-up, resulting in an annual rate of 4.5%. In  
38 comparison, the French IT-DIAB study,[36] a 5-year, prospective, observational study in  
39 subjects with impaired FPG, defined by a higher cut off point (>110 and <126 mg/dL),  
40 reported an annual conversion rate to diabetes of 7.1%. The IT-DIAB study also reported  
41 that FLI could stratify the risk of conversion to T2D or the possibility of prediabetes  
42 reversion in clinical practice, independent of classical glucose parameters. That study  
43 reported that the probability of prediabetes reversion was higher in subjects with FLI <30  
44 than in those with FLI 30-59 and FLI>60. We found that the incidence of T2D was higher  
45 in our study than in previous studies.[37–39] These differences could have resulted from  
46 differences in sociodemographic characteristics in study populations. The ARIC  
47 study,[37] which reported an annual conversion rate to T2D of 2.3%, included a higher  
48 percentage of women than in our cohort, whereas the ELSA-Brasil study,[39] which  
49 found that the annual conversion rate to T2D was 3.5%, included a higher percentage of  
50 subjects with high educational level. The PREDAPS study[40] showed a similar annual  
51  
52  
53  
54  
55  
56  
57  
58  
59  
60



1  
2  
3 conversion rate (4.2%). The incidence of T2D incidence in our sample was lower than  
4 that (5.8%) in a Korean population[41] of 7,680 subjects who had undergone general  
5 routine health evaluations. Similar to our study, 65.5% of the Korean subjects were men,  
6 with male sex being a risk factor for development of T2D in patients with prediabetes.  
7  
8  
9

10  
11 The FLI should be utilized as a practical tool in primary care for the early detection  
12 of NAFLD in subjects with prediabetes and to analyze the risk of developing T2D.[42]  
13 This would benefit patients at greater risk for T2D, allowing more careful monitoring and  
14 providing an opportunity for early interventions to prevent and reduce both the  
15 progression of hepatic disease. The present study also highlighted the importance of  
16 controlling BMI and promote PA and consumption of fruits and vegetables in preventing  
17 progression to T2D. Determining lifestyle-related factors, particularly PA, together with  
18 repeated anthropometrical measurements in subjects with prediabetes may be crucial in  
19 properly assessing the risks of progression to T2D and of cardiovascular events.[43]  
20  
21  
22  
23  
24  
25  
26  
27

### 28 **Strengths and limitations**

29  
30 This study had some limitations. First, it incorporated data from periodic health  
31 assessments performed in the workplace. None of these subjects underwent oral glucose  
32 tolerance tests (OGTT), which is considered more sensitive but less specific than FPG for  
33 identifying people at risk of developing T2D. Secondly, lifestyle modifications (e.g. diet,  
34 PA) of study participants were not evaluated throughout the 5-year follow-up, which may  
35 have resulted in misclassification bias. The main strengths of this study were the large  
36 sample size (16,648 subjects) and the relatively long follow-up period. Study participants  
37 had multiple occupations and were from several geographical locations, suggesting that  
38 the study population was representative of Spanish workforce. Finally, the different  
39 statistical analyses performed point out analogous results evidencing the ability of FLI  
40 values to predict conversion to T2D in 5 years.  
41  
42  
43  
44  
45  
46  
47  
48  
49

### 50 **Clinical implications**

51  
52 This study highlights the importance of FLI as an easily calculated and valuable early  
53 indicator for high risk of T2D in subjects with prediabetes. FLI-based screening could  
54 allow the adoption of effective measures to prevent and reduce the progression of  
55 NAFLD. The workplace could be a feasible setting for implementing diabetes prevention  
56 programs based on early detection and lifestyle changes.  
57  
58  
59  
60

## CONCLUSION

Because of the progressive nature of NAFLD and the risk of serious consequences, health care providers should be strongly advised to screen routinely for NAFLD in all subjects with prediabetes or at risk of T2D. Fatty liver indices are simple clinical tools for evaluating the extent of liver fat and are predictive of incident diabetes. Concretely, the FLI is a simple, effective and practical method of stratifying the risk of conversion to T2D based on the degree of hepatic steatosis. FLI may be useful in routine clinical practice as an additional screening tool to identify subjects with prediabetes who are at high risk of progression and could benefit from early interventions. The workplace may be a feasible setting for the assessment of risk factors, allowing early detection of NAFLD in younger subjects with prediabetes who are likely to progress to T2D and the implementation of T2D prevention programs.

## REFERENCES

- 1 Younossi ZM, Marchesini G, Pinto-Cortez H, *et al.* Epidemiology of Nonalcoholic Fatty Liver Disease and Nonalcoholic Steatohepatitis: Implications for Liver Transplantation. *Transplantation* 2019;**103**:22–7. doi:10.1097/TP.0000000000002484
- 2 Cobbina E, Akhlaghi F. Non-alcoholic fatty liver disease (NAFLD)–pathogenesis, classification, and effect on drug metabolizing enzymes and transporters. *Drug Metab Rev* 2017;**49**:197–211. doi:10.1080/03602532.2017.1293683
- 3 Bellentani S. The epidemiology of non-alcoholic fatty liver disease. *Liver Int* 2017;**37**:81–4. doi:10.1111/liv.13299
- 4 Tana C, Ballestri S, Ricci F, *et al.* Cardiovascular Risk in Non-Alcoholic Fatty Liver Disease : Mechanisms and Therapeutic Implications. *Int J Environ Res Public Health* 2019;**16**:1–19. doi:10.3390/ijerph16173104
- 5 Franch-Nadal J, Caballeria L, Mata-Cases M, *et al.* Fatty liver index is a predictor of incident diabetes in patients with prediabetes: The PREDAPS study. *PLoS One* 2018;**13**:1–17. doi:10.1371/journal.pone.0198327
- 6 Caballería L, Antonia MA, Torán P, *et al.* Prevalence and factors associated with the presence of non alcoholic fatty liver disease in an apparently healthy adult population in primary care units. *BMC Gastroenterol* 2007;**7**:1–6. doi:10.1186/1471-230X-7-41
- 7 Hazlehurst JM, Woods C, Marjot T, *et al.* Non-alcoholic fatty liver disease and diabetes.

- 1  
2  
3 *Metabolism* 2016;**65**:1096–108. doi:10.1016/j.metabol.2016.01.001
- 4  
5 8 Falguera M, Vilanova MB, Alcubierre N, *et al.* Prevalence of pre-diabetes and  
6 undiagnosed diabetes in the Mollerussa prospective observational cohort study rural area  
7 of Catalonia in a semi- rural area of catalonia. *BMJ Open* 2019;**10**:1–9.  
8 doi:10.1136/bmjopen-2019-033332
- 9  
10 9 Sanyal AJ. Past, present and future perspectives in nonalcoholic fatty liver disease. *Nat*  
11 *Rev Gastroenterol Hepatol* 2019;**16**:377–86. doi:10.1038/s41575-019-0144-8
- 12  
13 10 Jäger S, Jacobs S, Kröger J, *et al.* Association between the fatty liver index and risk of  
14 type 2 diabetes in the EPIC-Potsdam study. *PLoS One* 2015;**10**:1–14.  
15 doi:10.1371/journal.pone.0124749
- 16  
17 11 Anstee QM, Targher G, Day CP. Progression of NAFLD to diabetes mellitus,  
18 cardiovascular disease or cirrhosis. *Nat Rev Gastroenterol Hepatol* 2013;**10**:330–44.  
19 doi:10.1038/nrgastro.2013.41
- 20  
21 12 Wieckowska A, Feldstein AE. Diagnosis of nonalcoholic fatty liver disease: Invasive  
22 versus noninvasive. *Semin Liver Dis* 2008;**28**:386–95. doi:10.1055/s-0028-1091983
- 23  
24 13 Papagianni M, Sofogianni A, Tziomalos K. Non-invasive methods for the diagnosis of  
25 nonalcoholic fatty liver disease. *World J Hepatol* 2015;**7**:638–48.  
26 doi:10.4254/wjh.v7.i4.638
- 27  
28 14 Bedogni G, Bellentani S, Miglioli L, *et al.* The fatty liver index: A simple and accurate  
29 predictor of hepatic steatosis in the general population. *BMC Gastroenterol* 2006;**6**:1–7.  
30 doi:10.1186/1471-230X-6-33
- 31  
32 15 Dyson JK, Anstee QM, McPherson S. Non-alcoholic fatty liver disease: a practical  
33 approach to diagnosis and staging. *Frontline Gastroenterol* 2014;**5**:211–8.  
34 doi:10.1136/flgastro-2013-100403
- 35  
36 16 Lee JH, Kim D, Kim HJ, *et al.* Hepatic steatosis index: A simple screening tool reflecting  
37 nonalcoholic fatty liver disease. *Dig Liver Dis* 2010;**42**:503–8.  
38 doi:10.1016/j.dld.2009.08.002
- 39  
40 17 Wang J, Li P, Jiang Z, *et al.* Diagnostic value of alcoholic liver disease (ALD)/  
41 nonalcoholic fatty liver disease (NAFLD) index combined with  $\gamma$ -glutamyl transferase in  
42 differentiating ALD and NAFLD. *Korean J Intern Med* 2016;**31**:479–87.  
43 doi:10.3904/kjim.2015.253
- 44  
45 18 Rotter I, Rył A, Szylińska A, *et al.* Lipid Accumulation Product (LAP) as an Index of  
46 Metabolic and Hormonal Disorders in Aging Men. *Exp Clin Endocrinol Diabetes*  
47 2017;**125**:176–82. doi:10.1055/s-0042-116071
- 48  
49 19 Poynard T, Lassailly G, Diaz E, *et al.* Performance of biomarkers FibroTest, ActiTest,  
50 SteatoTest, and NashTest in patients with severe obesity: Meta analysis of individual  
51 patient data. *PLoS One* 2012;**7**:1–8. doi:10.1371/journal.pone.0030325
- 52  
53  
54  
55  
56  
57  
58  
59  
60

- 1  
2  
3 20 Ayensa-vazquez JA, Leiva A, Tauler P, *et al.* Agreement between Type 2 Diabetes Risk  
4 Scales in a Caucasian Population : A Systematic Review and Report. *J Clin Med* 2020;**9**:1–  
5 19.  
6  
7  
8 21 Calori G, Lattuada G, Ragona F, *et al.* Fatty liver index and mortality: The cremona study  
9 in the 15th year of follow-up. *Hepatology* 2011;**54**:145–52. doi:10.1002/hep.24356  
10  
11 22 Zhou K, Cen J. The fatty liver index (FLI) and incident hypertension: A longitudinal study  
12 among Chinese population. *Lipids Health Dis* 2018;**17**:1–7. doi:10.1186/s12944-018-  
13 0858-6  
14  
15 23 Bennasar-Veny M, Fresneda S, López-González A, *et al.* Lifestyle and Progression to  
16 Type 2 Diabetes in a Cohort of Workers with Prediabetes. *Nutrients* 2020;**12**:1–13.  
17 doi:10.3390/nu12051538  
18  
19 24 American Diabetes Association. American Diabetes Association. Diagnosis and  
20 Classification of Diabetes Mellitus. *Diabetes Care* 2012;**35**:64–71. doi:10.2337/dc12-  
21 s064  
22  
23 25 Domingo-Salvany A, Bacigalupe A, Carrasco JM, *et al.* Propuestas de clase social  
24 neoweberiana y neomarxista a partir de la Clasificación Nacional de Ocupaciones 2011.  
25 *Gac Sanit* 2013;**27**:263–72. doi:10.1016/j.gaceta.2012.12.009  
26  
27 26 Stewart A, Marfell-Jones M, Olds T de RH. *International standards for anthropometric*  
28 *assessment. ISAK*. 3rd ed. Lower Hutt, New Zealand: 2011.  
29  
30 27 Youden, WJ. Index for rating diagnostic tests. *Cancer* 1950;**3**:32–5. doi: 10.1002/1097-  
31 0142(1950)3:1%3C32::aid-cnrcr2820030106%3E3.0.co;2-3  
32  
33 28 Nishi T, Babazono A, Maeda T, *et al.* Evaluation of the fatty liver index as a predictor for  
34 the development of diabetes among insurance beneficiaries with prediabetes. *J Diabetes*  
35 *Investig* 2015;**6**:309–16. doi:10.1111/jdi.12290  
36  
37 29 Bae JC, Rhee EJ, Lee WY, *et al.* Combined effect of nonalcoholic fatty liver disease and  
38 impaired fasting glucose on the development of type 2 diabetes: A 4-year retrospective  
39 longitudinal study. *Diabetes Care* 2011;**34**:727–9. doi:10.2337/dc10-1991  
40  
41 30 Wong VWS, Hui AY, Tsang SWC, *et al.* Prevalence of undiagnosed diabetes and  
42 postchallenge hyperglycaemia in Chinese patients with non-alcoholic fatty liver disease.  
43 *Aliment Pharmacol Ther* 2006;**24**:1215–22. doi:10.1111/j.1365-2036.2006.03112.x  
44  
45 31 Singh SP, Singh A, Pati GK, *et al.* A Study of Prevalence of Diabetes and Prediabetes in  
46 Patients of Non-Alcoholic Fatty Liver Disease and the Impact of Diabetes on Liver  
47 Histology in Coastal Eastern India. *J Diabetes Mellit* 2014;**04**:290–6.  
48 doi:10.4236/jdm.2014.44040  
49  
50 32 Balkau B, Lange C, Vol S, *et al.* Nine-year incident diabetes is predicted by fatty liver  
51 indices: The French D.E.S.I.R. study. *BMC Gastroenterol* 2010;**10**:1–9.  
52 doi:10.1186/1471-230X-10-56  
53  
54  
55  
56  
57  
58  
59  
60

- 1  
2  
3 33 Forlani G, Giorda C, Manti R, *et al.* The Burden of NAFLD and Its Characteristics in a  
4 Nationwide Population with Type 2 Diabetes. *J Diabetes Res* 2016;**2016**:29319.  
5 doi:10.1155/2016/2931985  
6  
7  
8 34 Lonardo A, Ballestri S, Marchesini G, *et al.* Nonalcoholic fatty liver disease: A precursor  
9 of the metabolic syndrome. *Dig Liver Dis* 2015;**47**:181–90. doi:10.1016/j.dld.2014.09.020  
10  
11 35 Saponaro C, Gaggini M, Gastaldelli A. Nonalcoholic Fatty Liver Disease and Type 2  
12 Diabetes: Common Pathophysiologic Mechanisms. *Curr Diab Rep* 2015;**15**:1–13.  
13 doi:10.1007/s11892-015-0607-4  
14  
15 36 Wargny M, Smati S, Pichelin M, *et al.* Fatty liver index is a strong predictor of changes  
16 in glycemic status in people with prediabetes: The IT-DIAB study. *PLoS One* 2019;**14**:1–  
17 14. doi:10.1371/journal.pone.0221524  
18  
19 37 Selvin E, Steffes MW, Gregg E, *et al.* Performance of A1C for the classification and  
20 prediction of diabetes. *Diabetes Care* 2011;**34**:84–9. doi:10.2337/dc10-1235  
21  
22 38 Giráldez-García C, María Hernández A, Gamarra J, *et al.* Evolución de pacientes con  
23 prediabetes en Atención Primaria de Salud (PREDAPS): resultados del quinto año de  
24 seguimiento. *Diabetes Práctica* 2018;**09**:37–80. doi:10.26322/2013.7923.1505400455.03  
25  
26 39 Schmidt MI, Bracco PA, Yudkin JS, *et al.* Intermediate hyperglycaemia to predict  
27 progression to type 2 diabetes (ELSA-Brasil): an occupational cohort study in Brazil.  
28 *Lancet Diabetes Endocrinol* 2019;**7**:267–77. doi:10.1016/S2213-8587(19)30058-0  
29  
30 40 Giráldez-García C, García-Soidán FJ, Serrano Martín R, *et al.* Evolución de pacientes con  
31 prediabetes en Atención Primaria de Salud (PREDAPS): resultados del primer año de  
32 seguimiento. *Diabetes Práctica* 2014;**05**:1–48.  
33  
34 41 Jung CH, Lee WJ, Hwang JY, *et al.* Assessment of the fatty liver index as an indicator of  
35 hepatic steatosis for predicting incident diabetes independently of insulin resistance in a  
36 korean population. *Diabet Med* 2013;**30**:428–35. doi:10.1111/dme.12104  
37  
38 42 Ciardullo S, Muraca E, Perra S, *et al.* Screening for non-alcoholic fatty liver disease in  
39 type 2 diabetes using non-invasive scores and association with diabetic complications.  
40 *BMJ Open Diabetes Res Care* 2020;**8**:1–9. doi:10.1136/bmjdr-2019-000904  
41  
42 43 Vistisen D, Witte DR, Brunner EJ, *et al.* Risk of cardiovascular disease and death in  
43 individuals with prediabetes defined by different criteria: The whitehall II study. *Diabetes*  
44 *Care* 2018;**41**:899–906. doi:10.2337/dc17-2530  
45  
46  
47  
48  
49  
50  
51  
52  
53  
54

55 **Acknowledgements** The authors are grateful to the field staff and participants of this  
56 study.  
57  
58  
59  
60

1  
2  
3 **Contributors** CB, MBV, AL, AA and AMY were responsible for the conception and  
4 design of the study. AL, SF and AA acquired the data, supervised the study and had full  
5 access to all study data. CB, MBV and AMY analyzed and interpreted the data and drafted  
6 the manuscript. SF, AL and AA participated in critical revision of the manuscript for  
7 important intellectual content. All authors read and approved the final version of the  
8 manuscript.  
9  
10  
11  
12  
13  
14

15 **Funding** This project was funded by the Carlos III Health Institute (Ministry of  
16 Economy and Competitiveness, Spain) through the Network for Prevention and Health  
17 Promotion in Primary Care (redIAPP, RD16/0007/008), and by European Union ERDF  
18 funds.  
19  
20  
21  
22  
23

24 **Competing interests** The authors declare that there are no competing interests.  
25  
26

27 **Data sharing statement** Data are available upon reasonable request. Readers may  
28 contact Dr. Arturo Lopez (angarturo@gmail.com) regarding the data. No additional data  
29 are available.  
30  
31  
32  
33  
34  
35  
36  
37  
38  
39  
40  
41  
42  
43  
44  
45  
46  
47  
48  
49  
50  
51  
52  
53  
54  
55  
56  
57  
58  
59  
60

1  
2  
3  
4  
5  
6  
7  
8  
9  
10  
11  
12  
13  
14  
15  
16  
17  
18  
19  
20  
21  
22  
23  
24  
25  
26  
27  
28  
29  
30  
31  
32  
33  
34  
35  
36  
37  
38  
39  
40  
41  
42  
43  
44  
45  
46  
47  
48  
49  
50  
51  
52  
53  
54  
55  
56  
57  
58  
59  
60

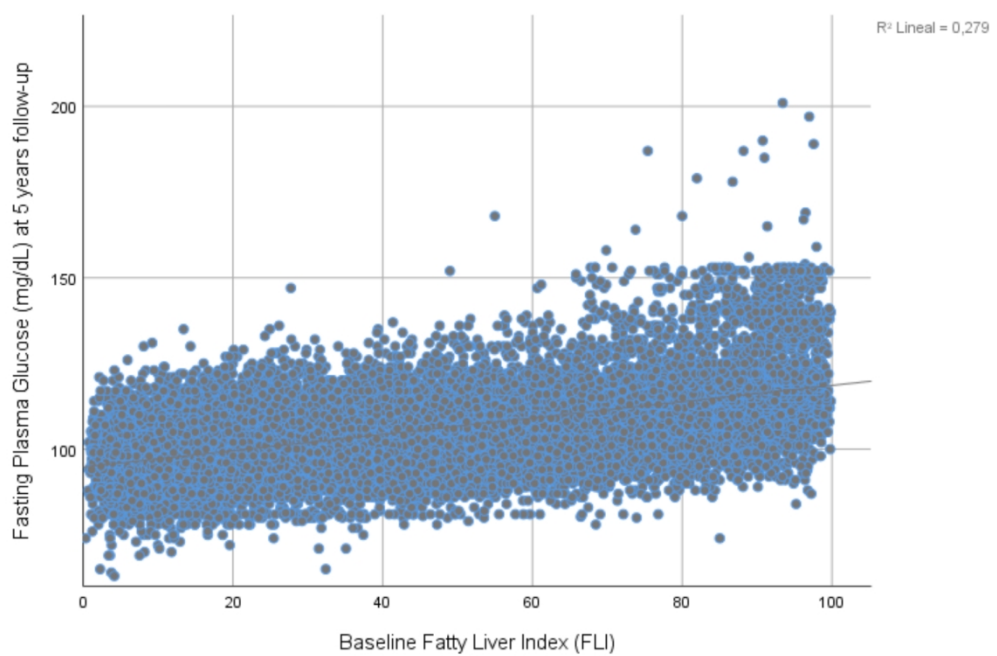

Figure 1

539x364mm (72 x 72 DPI)



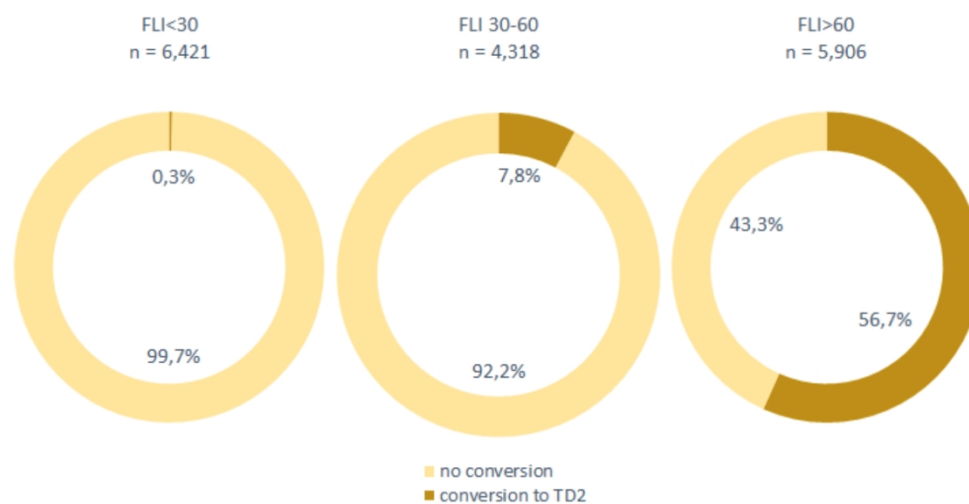

Figure 2

516x288mm (72 x 72 DPI)



1  
2  
3  
4  
5  
6  
7  
8  
9  
10  
11  
12  
13  
14  
15  
16  
17  
18  
19  
20  
21  
22  
23  
24  
25  
26  
27  
28  
29  
30  
31  
32  
33  
34  
35  
36  
37  
38  
39  
40  
41  
42  
43  
44  
45  
46  
47  
48  
49  
50  
51  
52  
53  
54  
55  
56  
57  
58  
59  
60

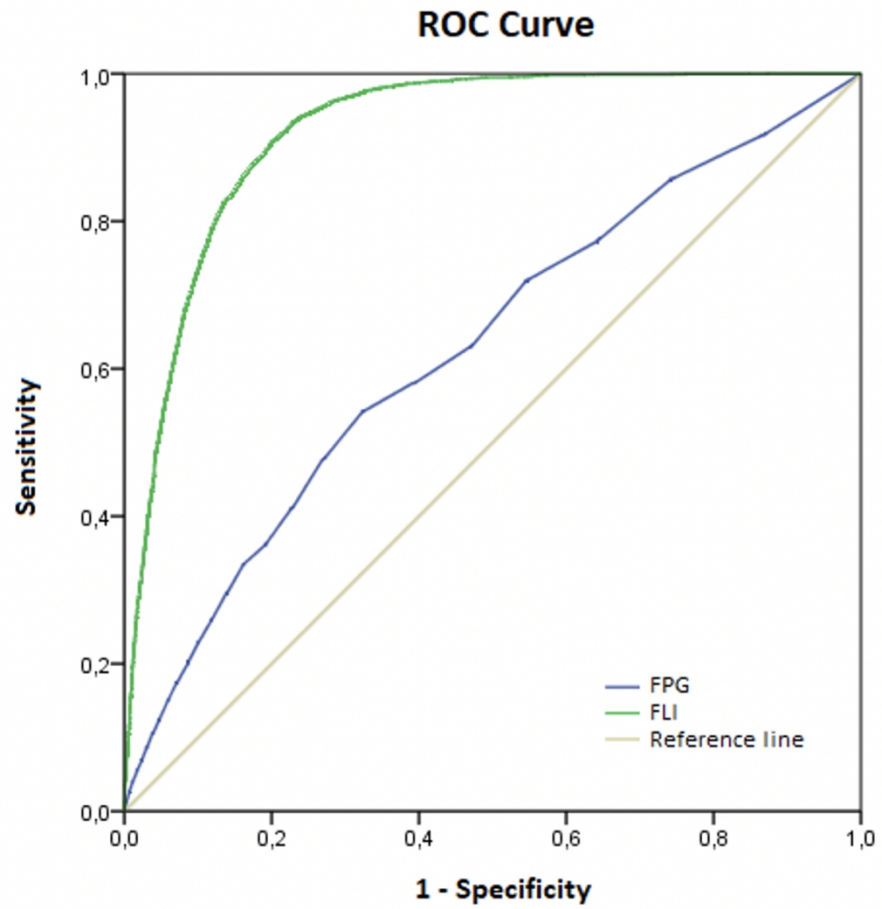

FPG: Area under the curve (AUC) = 0.629 (95% CI 0.618 to 0.639);  
FLI: AUC = 0.922 (95% CI 0.918 to 0.926)

Figure 3

STROBE Statement—Checklist of items that should be included in reports of *cohort studies*

|                              | Item No | Recommendation                                                                                                                                                                                                                                                                                                         | Page No |
|------------------------------|---------|------------------------------------------------------------------------------------------------------------------------------------------------------------------------------------------------------------------------------------------------------------------------------------------------------------------------|---------|
| <b>Title and abstract</b>    | 1       | (a) Indicate the study's design with a commonly used term in the title or the abstract<br>(b) Provide in the abstract an informative and balanced summary of what was done and what was found                                                                                                                          | 1-2     |
| <b>Introduction</b>          |         |                                                                                                                                                                                                                                                                                                                        |         |
| Background/rationale         | 2       | Explain the scientific background and rationale for the investigation being reported                                                                                                                                                                                                                                   | 3-4     |
| Objectives                   | 3       | State specific objectives, including any prespecified hypotheses                                                                                                                                                                                                                                                       | 4       |
| <b>Methods</b>               |         |                                                                                                                                                                                                                                                                                                                        |         |
| Study design                 | 4       | Present key elements of study design early in the paper                                                                                                                                                                                                                                                                | 4       |
| Setting                      | 5       | Describe the setting, locations, and relevant dates, including periods of recruitment, exposure, follow-up, and data collection                                                                                                                                                                                        | 4-5     |
| Participants                 | 6       | (a) Give the eligibility criteria, and the sources and methods of selection of participants. Describe methods of follow-up<br>(b) For matched studies, give matching criteria and number of exposed and unexposed                                                                                                      | 4       |
| Variables                    | 7       | Clearly define all outcomes, exposures, predictors, potential confounders, and effect modifiers. Give diagnostic criteria, if applicable                                                                                                                                                                               | 6-7     |
| Data sources/<br>measurement | 8*      | For each variable of interest, give sources of data and details of methods of assessment (measurement). Describe comparability of assessment methods if there is more than one group                                                                                                                                   | 6-7     |
| Bias                         | 9       | Describe any efforts to address potential sources of bias                                                                                                                                                                                                                                                              | 14      |
| Study size                   | 10      | Explain how the study size was arrived at                                                                                                                                                                                                                                                                              | -       |
| Quantitative variables       | 11      | Explain how quantitative variables were handled in the analyses. If applicable, describe which groupings were chosen and why                                                                                                                                                                                           |         |
| Statistical methods          | 12      | (a) Describe all statistical methods, including those used to control for confounding<br>(b) Describe any methods used to examine subgroups and interactions<br>(c) Explain how missing data were addressed<br>(d) If applicable, explain how loss to follow-up was addressed<br>(e) Describe any sensitivity analyses | 7       |
| <b>Results</b>               |         |                                                                                                                                                                                                                                                                                                                        |         |
| Participants                 | 13*     | (a) Report numbers of individuals at each stage of study—eg numbers potentially eligible, examined for eligibility, confirmed eligible, included in the study, completing follow-up, and analysed<br>(b) Give reasons for non-participation at each stage<br>(c) Consider use of a flow diagram                        | 8       |
| Descriptive data             | 14*     | (a) Give characteristics of study participants (eg demographic, clinical, social) and information on exposures and potential confounders<br>(b) Indicate number of participants with missing data for each variable of interest<br>(c) Summarise follow-up time (eg, average and total amount)                         | 9       |
| Outcome data                 | 15*     | Report numbers of outcome events or summary measures over time                                                                                                                                                                                                                                                         | -       |

|    |                          |    |                                                                                                                                                                                                              |       |
|----|--------------------------|----|--------------------------------------------------------------------------------------------------------------------------------------------------------------------------------------------------------------|-------|
| 1  | Main results             | 16 | (a) Give unadjusted estimates and, if applicable, confounder-adjusted estimates and their precision (eg, 95% confidence interval). Make clear which confounders were adjusted for and why they were included | 10-11 |
| 2  |                          |    | (b) Report category boundaries when continuous variables were categorized                                                                                                                                    |       |
| 3  |                          |    | (c) If relevant, consider translating estimates of relative risk into absolute risk for a meaningful time period                                                                                             |       |
| 4  |                          |    |                                                                                                                                                                                                              |       |
| 5  |                          |    |                                                                                                                                                                                                              |       |
| 6  |                          |    |                                                                                                                                                                                                              |       |
| 7  |                          |    |                                                                                                                                                                                                              |       |
| 8  |                          |    |                                                                                                                                                                                                              |       |
| 9  | Other analyses           | 17 | Report other analyses done—eg analyses of subgroups and interactions, and sensitivity analyses                                                                                                               | -     |
| 10 |                          |    |                                                                                                                                                                                                              |       |
| 11 | <b>Discussion</b>        |    |                                                                                                                                                                                                              |       |
| 12 |                          |    |                                                                                                                                                                                                              |       |
| 13 | Key results              | 18 | Summarise key results with reference to study objectives                                                                                                                                                     | 12    |
| 14 | Limitations              | 19 | Discuss limitations of the study, taking into account sources of potential bias or imprecision. Discuss both direction and magnitude of any potential bias                                                   | 14    |
| 15 |                          |    |                                                                                                                                                                                                              |       |
| 16 | Interpretation           | 20 | Give a cautious overall interpretation of results considering objectives, limitations, multiplicity of analyses, results from similar studies, and other relevant evidence                                   | 12-14 |
| 17 |                          |    |                                                                                                                                                                                                              |       |
| 18 |                          |    |                                                                                                                                                                                                              |       |
| 19 | Generalisability         | 21 | Discuss the generalisability (external validity) of the study results                                                                                                                                        | 14    |
| 20 |                          |    |                                                                                                                                                                                                              |       |
| 21 | <b>Other information</b> |    |                                                                                                                                                                                                              |       |
| 22 | Funding                  | 22 | Give the source of funding and the role of the funders for the present study and, if applicable, for the original study on which the present article is based                                                | 19    |
| 23 |                          |    |                                                                                                                                                                                                              |       |
| 24 |                          |    |                                                                                                                                                                                                              |       |

25  
26 \*Give information separately for exposed and unexposed groups.

27  
28 **Note:** An Explanation and Elaboration article discusses each checklist item and gives methodological background and  
29 published examples of transparent reporting. The STROBE checklist is best used in conjunction with this article (freely  
30 available on the Web sites of PLoS Medicine at <http://www.plosmedicine.org/>, Annals of Internal Medicine at  
31 <http://www.annals.org/>, and Epidemiology at <http://www.epidem.com/>). Information on the STROBE Initiative is  
32 available at <http://www.strobe-statement.org>.  
33  
34  
35  
36  
37  
38  
39  
40  
41  
42  
43  
44  
45  
46  
47  
48  
49  
50  
51  
52  
53  
54  
55  
56  
57  
58  
59  
60

# BMJ Open

## Fatty liver index and progression to type 2 diabetes: a five-year longitudinal study in Spanish workers with prediabetes

|                                 |                                                                                                                                                                                                                                                                                                                                                                                                                                                                                                                    |
|---------------------------------|--------------------------------------------------------------------------------------------------------------------------------------------------------------------------------------------------------------------------------------------------------------------------------------------------------------------------------------------------------------------------------------------------------------------------------------------------------------------------------------------------------------------|
| Journal:                        | <i>BMJ Open</i>                                                                                                                                                                                                                                                                                                                                                                                                                                                                                                    |
| Manuscript ID                   | bmjopen-2020-045498.R1                                                                                                                                                                                                                                                                                                                                                                                                                                                                                             |
| Article Type:                   | Original research                                                                                                                                                                                                                                                                                                                                                                                                                                                                                                  |
| Date Submitted by the Author:   | 27-Feb-2021                                                                                                                                                                                                                                                                                                                                                                                                                                                                                                        |
| Complete List of Authors:       | Busquets-Cortés, Carla; University of the Balearic Islands, Nursing and Physiotherapy Department<br>Bennasar-Veny, Miquel; University of the Balearic Islands, Nursing and Physiotherapy Department<br>López-González, Angel-Arturo; Balearic Islands Health Services<br>Fresneda, Sergio; University of the Balearic Islands, Nursing and Physiotherapy Department<br>Aguiló, Antoni; University of the Balearic Islands<br>Yanez, Aina; University of the Balearic Islands, Nursing and Physiotherapy Department |
| <b>Primary Subject Heading</b>: | Diabetes and endocrinology                                                                                                                                                                                                                                                                                                                                                                                                                                                                                         |
| Secondary Subject Heading:      | Diabetes and endocrinology, Epidemiology                                                                                                                                                                                                                                                                                                                                                                                                                                                                           |
| Keywords:                       | DIABETES & ENDOCRINOLOGY, NUTRITION & DIETETICS, PRIMARY CARE, OCCUPATIONAL & INDUSTRIAL MEDICINE                                                                                                                                                                                                                                                                                                                                                                                                                  |
|                                 |                                                                                                                                                                                                                                                                                                                                                                                                                                                                                                                    |

SCHOLARONE™  
Manuscripts



I, the Submitting Author has the right to grant and does grant on behalf of all authors of the Work (as defined in the below author licence), an exclusive licence and/or a non-exclusive licence for contributions from authors who are: i) UK Crown employees; ii) where BMJ has agreed a CC-BY licence shall apply, and/or iii) in accordance with the terms applicable for US Federal Government officers or employees acting as part of their official duties; on a worldwide, perpetual, irrevocable, royalty-free basis to BMJ Publishing Group Ltd ("BMJ") its licensees and where the relevant Journal is co-owned by BMJ to the co-owners of the Journal, to publish the Work in this journal and any other BMJ products and to exploit all rights, as set out in our [licence](#).

The Submitting Author accepts and understands that any supply made under these terms is made by BMJ to the Submitting Author unless you are acting as an employee on behalf of your employer or a postgraduate student of an affiliated institution which is paying any applicable article publishing charge ("APC") for Open Access articles. Where the Submitting Author wishes to make the Work available on an Open Access basis (and intends to pay the relevant APC), the terms of reuse of such Open Access shall be governed by a Creative Commons licence – details of these licences and which [Creative Commons](#) licence will apply to this Work are set out in our licence referred to above.

Other than as permitted in any relevant BMJ Author's Self Archiving Policies, I confirm this Work has not been accepted for publication elsewhere, is not being considered for publication elsewhere and does not duplicate material already published. I confirm all authors consent to publication of this Work and authorise the granting of this licence.

1  
2  
3  
4 **Fatty liver index and progression to type 2 diabetes: a five-year longitudinal study**  
5 **in Spanish workers with prediabetes**  
6  
7

8 Carla Busquets-Cortés,<sup>1,2</sup> Miquel Bannasar-Veny,<sup>1,3\*</sup> Arturo López-González,<sup>2,4</sup> Sergio  
9 Fresneda,<sup>1,3</sup> Antoni Aguiló,<sup>1,3</sup> Aina M. Yáñez<sup>3,5</sup>  
10  
11

12  
13 <sup>1</sup>Research Group on Evidence, Lifestyles & Health, Instituto de Investigación Sanitaria  
14 Illes Balears, Palma, Illes Balears, Spain  
15

16 <sup>2</sup>Escuela Universitaria ADEMA, Palma, Spain  
17

18 <sup>3</sup>Department of Nursing and Physiotherapy, Balearic Islands University, Palma, Illes  
19 Balears, Spain  
20

21 <sup>4</sup>Prevention of Occupational Risks in Health Services, Balearic Islands Health Service,  
22 Palma, Spain  
23

24 <sup>5</sup>Global Health and Human Development Research Group, Balearic Islands University,  
25 Palma, Illes Balears, Spain  
26  
27  
28  
29

30  
31 **Corresponding author:** Miquel Bannasar-Veny, Nursing and Physiotherapy  
32 Department, Universitat de les Illes Balears, Cra. de Valldemossa km 7,5 Palma 07122,  
33 Spain. E-mail: [miquel.bannasar@uib.es](mailto:miquel.bannasar@uib.es) Telephone number: +34 971 172367  
34  
35  
36  
37  
38

39 **Key words:** Conversion, Fatty Liver Index, Non-alcoholic Fatty Liver Disease, Fasting  
40 Plasma Glucose, Prediabetes, Type 2 Diabetes.  
41  
42  
43  
44  
45

46 **Word count** (excluding title page, abstract, references, figures and tables): 3,338 words  
47  
48  
49  
50  
51  
52  
53  
54  
55  
56  
57  
58  
59  
60

## ABSTRACT

**Objective:** The main aim of the study was to evaluate the association between non-alcoholic fatty liver disease (NAFLD), estimated by fatty liver index (FLI), and the development of type 2 diabetes (T2D) in a large cohort of adult workers with prediabetes.

**Design:** Prospective cohort study.

**Setting:** Occupational health services from Spain.

**Participants:** 16,648 adult workers (aged 20 to 65 years) with prediabetes (fasting plasma glucose (FPG) of 100-125 mg/dl).

**Outcome and measures:** FLI was calculated based on measurements of triglycerides, body mass index, waist circumference and  $\gamma$ -glutamyltransferase. The population was classified into three categories: FLI <30 (no hepatic steatosis), FLI 30–60 (intermediate status), and FLI >60 (hepatic steatosis). Sociodemographic, anthropometric, dietary habits, physical activity and clinical data were collected from all subjects. The incidence rate of T2D was determined after 5 years of follow-up.

**Results:** After 5 years of follow-up, 3,706 of the 16,648 participants (22.2%) were diagnosed with T2D, corresponding to an annual rate of progression of 4.5%. FLI was strongly associated with T2D conversion. The incidence rates of T2D in the FLI <30, FLI 30-60 and FLI >60 groups were significantly different after 5 years of follow-up were 19/6,421 (0.3%), 338/4,318 (7.8%) and 3,349/5,909 (56.7%), respectively. This association remained significant for FLI >60 after adjustment for, age, diet, physical activity, FPG blood pressure, social class and smoking habits (adjusted HR=6.879; 95% CI 5.873 to 8.057 for men, and HR=5.806; 95% CI 4.863 to 6.932 for women).

**Conclusion:** NAFLD assessed by FLI independently predicted the risk of conversion to T2D among people with prediabetes. FLI may be an easily determined and valuable early predictor for T2D in people with prediabetes. FLI-based assessment of NAFLD in subjects with prediabetes in routine clinical practice could allow the adoption of effective measures to prevent and reduce their progression to T2D.

### Strengths and limitations of this study

- This is a prospective study, with large sample size and 5-years follow-up.
- Study participants had multiple occupations and were from several geographical locations.
- The study sample included only adult workers therefore the results cannot be generalized to the general population.

For peer review only



## INTRODUCTION

Type 2 Diabetes (T2D) is closely associated with a constellation of metabolic comorbidities, including obesity, hypertension, hypercholesterolemia, dyslipidemia and non-alcoholic fatty liver disease (NAFLD).[1] The main characteristic of NAFLD is the infiltration of hepatocytes by free fatty acids and triglycerides not related to significant alcohol intake. NAFLD is an entity that encompasses a wide spectrum of lesions ranging from indolent liver fat storage followed by lipotoxicity,[2] to hepatic inflammation, also known as non-alcoholic steatohepatitis (NASH). NAFLD is the most common chronic liver disease worldwide that is associated with excess health-related expenditures, making it a community health problem.[3]

Mounting evidence indicates a close association between the pathogenesis of T2D and NAFLD;[4–8] evidence suggests a complex bidirectional relationship, whereby presence of one leads to the progression of the other.[9] The presence of NAFLD increases the incidence of T2D, while diabetes might contribute to the worsening of NAFLD to more advanced stages such as steatohepatitis and even hepatocellular carcinoma.[10]

NAFLD is strongly associated with insulin resistance such that prevalence of NAFLD is 5-fold higher in patients with T2D compared to those without.[8] Recent data showed that there is a solid genetic basis that support their association, since gene variants in numerous proteins related to lipid and glucose metabolism, appear to significantly raise the risk of NAFLD and T2D.[10,11] These genetic abnormalities are directly linked to hepatic and peripheral insulin resistance, resulting in a deficient inhibition of hepatic gluconeogenesis, diminished glycogen synthesis and increased extrahepatic lipid accumulation. Other mechanisms underlying these NAFLD-T2D pathogenic duo involve excessive hepatic fat accumulation, diverse alterations in energy metabolism, altered microbiome, comorbidities, increased reactive oxygen species production and inflammatory signals derived from different cell types including immune cells, such as proinflammatory cytokines.[12]

The estimated overall worldwide prevalence of NAFLD in the general adult population is about 25–30%,[3,13] but ranges from 40%–70% in subjects with established T2D.[14,15] In fact, NAFLD and T2D are conditions that frequently coexist

1  
2  
3 and can act synergistically to drive adverse outcomes.[16] NAFLD is considered the  
4 hepatic manifestation of metabolic syndrome (MetS)[17] because epidemiological  
5 studies have consistently shown that NAFLD is strongly linked to obesity, dyslipidemia,  
6 and insulin resistance.[18,19] Therefore, NAFLD is thought to be an independent risk  
7 factor for incident T2D[16] and cardiovascular disease.[20]  
8  
9  
10  
11

12  
13 Liver biopsy is currently the gold standard for diagnosing progressive  
14 NAFLD.[21] Biopsies are invasive procedures with several drawbacks, including  
15 sampling error, interobserver variability, high cost, patient discomfort and risk of  
16 complications.[14] Moreover, obtaining liver biopsies from all patients with NAFLD is  
17 unrealistic. Abdominal ultrasonography is a simple, inexpensive, widely available and  
18 minimally invasive technique that is used to diagnose fatty liver in most subjects.  
19 However, its sensitivity is low in subjects with fatty retention less than 20%–30% and it  
20 does not provide information on the degree of fibrosis.[22] Consequently, attempts have  
21 been made to diagnose NAFLD/NASH using clinical and laboratory-based biomarkers  
22 and scoring systems that can predict fatty changes in the liver. These indices for the  
23 diagnosis of NAFLD/NASH include the fatty liver index (FLI),[23] NAFLD liver fat  
24 score,[24] the hepatic steatosis index (HSI),[25] the ALD/NAFLD index (ANI),[26] the  
25 lipid accumulation product (LAP)[27] and the SteatoTest (ST).[28] These indices require  
26 the measurement of patient characteristics, including concentrations of triglycerides  
27 (TG),  $\gamma$ -glutamyl transpeptidase (GGT), aspartate aminotransferase (AST), alanine  
28 transaminase (ALT), insulin, body mass index (BMI), waist circumference (WC), gender,  
29 mean corpuscular value and presence or absence of T2D or metabolic syndrome.[29] The  
30 FLI is a simple and accurate algorithm that combines routine measurements of TG and  
31 GGT concentrations, WC and BMI, showing an excellent discriminative ability to predict  
32 ultrasonographic NAFLD and hepatic steatosis in the general population.[23,30]  
33  
34  
35  
36  
37  
38  
39  
40  
41  
42  
43  
44  
45  
46  
47

48 The FLI has been reported to correlate with: 1) insulin resistance; 2) risk of  
49 coronary heart disease; 3) MetS; 4) early atherosclerosis; and 5) rates of non-hepatic-  
50 related morbidity and mortality in nondiabetic subjects.[31] Thus, FLI-diagnosed  
51 NAFLD may be an indicator of incident T2D.[19] Nonetheless, the risk of progression to  
52 T2D determined by FLI in patients with prediabetes remains poorly understood.  
53  
54  
55  
56  
57

58 Few studies have evaluated the influence of NAFLD as a risk factor for T2D  
59 development in a cohort of workers with prediabetes. Determining FLI in subjects with  
60

1  
2  
3 prediabetes may be highly relevant, as both epidemiological and clinical evidence have  
4 shown that primary health care prevention programs should target people at greater risk  
5 of developing T2D. The present study was therefore designed to evaluate the association  
6 between NAFLD, as estimated by FLI, and the development of T2D in a large cohort of  
7 South-European Mediterranean workers with prediabetes.  
8  
9  
10  
11  
12  
13  
14

## 15 **Methods**

### 16 **Study population and design**

17  
18  
19  
20  
21 This cohort study included 16,648 Spanish working adults with prediabetes who worked  
22 in public administration, construction, health departments or post offices. The study  
23 methods have been described in detail previously.[32] Briefly, participants were carefully  
24 chosen from 234,995 potentially eligible individuals who underwent periodic  
25 occupational health assessments between 2012 and 2013. Participants were included if  
26 they were aged 20–65 years and had an FPG of 100–125 mg/dL.[33] Subjects were  
27 excluded if they had a history of physician-diagnosed diabetes, had been treated with an  
28 oral antidiabetic agent or a systemic glucocorticoid, had an FPG  $\geq 126$  mg/dL or an  
29 HbA1c  $\geq 6.5\%$  at baseline, had received cancer treatment during the preceding 5 years,  
30 had anemia (hematocrit  $< 36\%$  in men and  $< 33\%$  in women) or were pregnant. All subjects  
31 underwent standard health examinations, anthropometric measurements, and metabolic  
32 tests at baseline and were followed-up 5 years later, in 2017 and 2018.  
33  
34  
35  
36  
37  
38  
39  
40  
41  
42

43 All the procedures in the study protocol were in accordance with the Declaration  
44 of Helsinki for research on human participants and were approved by the Balearic Islands  
45 Ethical Committee of Clinical Research (Ref. No: CEI-IB-1887). All participants were  
46 carefully informed of the purpose and demands of the study. Informed consent was  
47 obtained from all participants included in the study.  
48  
49  
50  
51

### 52 **Patient and public involvement**

53  
54  
55 People were not involved in setting the research question nor in the study design.  
56 Participants were interviewed face to face by trained researchers for a detailed  
57 explanation of the purpose of this research and informed consent at the beginning. Results  
58 of the research will be disseminated to the participants.  
59  
60

## Data collection

At baseline, anthropometric measurements and fasting blood sample were taken from all subjects during occupational health examinations. A questionnaire was administered to collect data on sociodemographic characteristics, dietary habits, physical activity (PA) and clinical data. Participants were asked to report if they performed moderate and/or vigorous exercise (at least 150 min/week, according to World Health Organization [WHO] recommendations) and if they consumed fruits and vegetables daily. Each individual was also categorized as a current smoker (habitual or casual), former smoker, or never smoker, according to WHO criteria. Social class was defined using the Spanish Epidemiology Society classification, which is based on occupation and it has shown high correlation with level of education.[34] Class I (upper class) includes executives, managers, and university professionals; Class II (middle class) includes intermediate occupations and employees; and Class III (lower class) includes manual workers.

All anthropometric measurements were made in the morning, after an overnight fast, at the same time and according to the guidelines and recommendations in the International Standards for Anthropometric Assessment (ISAK) manual.[35] All measurements were performed by well trained technicians or researchers to minimize coefficients of variation. Body weight was measured to the nearest 0.1 kg using an electronic scale (Seca 700 scale, Hamburg); height was measured to the nearest 0.5 cm using a stadiometer (Seca 220) Telescopic Height Rod for Column Scales, Hamburg); and BMI was calculated as weight (kg) divided by height (m) squared ( $\text{kg/m}^2$ ). Obesity was defined as  $\text{BMI} \geq 30.0 \text{ kg/m}^2$ , in agreement with WHO guidelines. Blood pressure was measured after a resting period of 10 minutes, with the subject in the supine position, using an electric and calibrated sphygmomanometer (OMRON M3, Healthcare Europe, Spain). Blood pressure in each subject was measured three times with a one-minute gap between measurements and their average was calculated.

Venous blood samples were taken from the antecubital vein of each subject in a sitting position, in the morning after a 12 h overnight fast. Blood samples were collected in suitable vacutainers without anticoagulant to obtain serum. Serum concentrations of glucose, TG and cholesterol were measured by standard procedures using a Beckman Coulter SYNCHRON CX® 9 PRO clinical system (La Brea, CA, USA).

The main outcome variable of the study was the time elapsed until T2D onset, defined as FPG  $\geq 126$  mg/dl,[36] or the time until initiation of anti-hyperglycemic medications for diabetes control in people with prediabetes during the follow-up period.

### **FLI as a surrogate measure of fatty liver**

The FLI was calculated based on measurements of TG, GGT, BMI and WC, using the formula[23]:

$$\text{Fatty Liver Index (FLI)} = e^y / (1 + e^y) \times 100$$

$$\text{Where } y = 0.953 \times \ln(\text{TG}) + 0.139 \times \text{BMI} + 0.718 \times \ln(\text{GGT}) + 0.053 \times \text{WC} - 15.745$$

Here, TG indicates triglyceride concentration, measured as mg/dl; BMI indicates body mass index, measured as kg/m<sup>2</sup>; GGT indicates  $\gamma$ -glutamyl transpeptidase, measured as U/l; and WC indicates waist circumference, measured as cm.

FLI, which ranges from 0 to 100, has shown good diagnostic accuracy in detecting fatty liver, with an Area Under the Curve (AUC) of 0.85 and a 95% confidence interval (CI) of 0.81–0.88.[19,23] FLI <30 was found to rule out steatosis with a sensitivity of 87% and a specificity of 64%, whereas FLI >60 was indicative of the presence of steatosis with a sensitivity of 61% and specificity of 86%.[23] FLI scores have been validated by comparison with the results of liver ultrasound and nuclear magnetic resonance spectroscopy. An FLI of 30–60 indicated indeterminate risk, in which fatty liver could not be ruled in or out.

### **Statistical analyses**

Continuous variables were expressed in means ( $\pm$ SDs) and compared by Student's t-test and one-way analysis of variance (ANOVA), with post-hoc Bonferroni contrast method. Categorical variables were expressed as n (%) and compared by chi-square ( $\chi^2$ ) tests with Bonferroni post-hoc method. Crude and multivariable Cox regression analyses were performed to calculate FLI, diet and PA hazard ratios (HR) for the development of diabetes, adjusting for potential confounders (age, social class, BMI, smoking, SBP, FPG) that showed significant association in univariate analysis. Schoenfeld residuals were used to check the proportional hazard assumption. For this analysis participants were classified into two categories: those with FLI >60 and FLI <60

1  
2  
3 All analyses were performed using the Statistical Package for the Social Sciences  
4 (SPSS) version 25.0 (IBM Company, New York, NY, USA) for Windows. All statistical  
5 tests were two-sided, and p values <0.05 were considered statistically significant.  
6  
7  
8  
9  
10

## 11 **RESULTS**

12  
13  
14 Baseline demographic and anthropometric characteristics of the study subjects by sex are  
15 shown in Table 1. The sample included 16,648 individuals with prediabetes, comprised  
16 of 12,080 (72.6%) men and 4,568 (27.4%) women, of mean age  $44.81 \pm 9.91$  years. The  
17 prevalence of obesity in the entire sample was 26.9%. The percentage of men was  
18 significantly higher among subjects with than without NAFLD. There were also  
19 significant differences in all anthropometrical and biochemical parameters analyzed, with  
20 BMI, WC, TG, fasting plasma glucose (FPG), cholesterol, GGT and SBP and DBP being  
21 significantly higher in subjects with than without NAFLD. The percentages of subjects  
22 who performed at least 150 min per week of PA (4.3% vs. 61.8%;  $p < 0.001$ ) and who did  
23 not consume fruits and vegetables every day (12.0% vs. 56.4%;  $p < 0.001$ ) were  
24 significantly lower in subjects with than without NAFLD.  
25  
26  
27  
28  
29  
30  
31  
32  
33  
34  
35  
36  
37  
38  
39  
40  
41  
42  
43  
44  
45  
46  
47  
48  
49  
50  
51  
52  
53  
54  
55  
56  
57  
58  
59  
60

**Table 1** Basal anthropometric characteristics and biochemical parameters of subjects by sex

| Characteristics                    | All<br>(n = 16,648) | Men<br>(n = 12,080) | Women<br>(n= 4,568) | P value |
|------------------------------------|---------------------|---------------------|---------------------|---------|
| Age (years)                        | 44.51 ± 9.89        | 44.38 ± 9.87        | 44.84 ± 9.94        | < 0.01  |
| Social class                       |                     |                     |                     | <0.001  |
| I                                  | 741 (4.5%)          | 558 (4.6%)          | 183 (4.0%)          |         |
| II                                 | 2,779 (16.7%)       | 1,902 (15.7%)       | 877 (19.2%)         |         |
| III                                | 13,128 (78.9%)      | 9,620 (79.6%)       | 3,508 (76.8%)       |         |
| BMI (kg/m <sup>2</sup> )           | 27.66 ± 4.81        | 27.76 ± 4.47        | 27.42 ± 5.61        | < 0.001 |
| BMI categories                     |                     |                     |                     | < 0.001 |
| Normal weight                      | 5,049 (30.3%)       | 3,300 (27.3%)       | 1,749 (38.3%)       |         |
| Overweight                         | 7,120 (42.8%)       | 5,596 (46.3%)       | 1,524 (33.4%)       |         |
| Obese                              | 4,479 (26.9%)       | 3,184 (26.4%)       | 1,295 (28.3%)       |         |
| WC (cm)                            | 87.00 ± 9.95        | 90.28 ± 8.62        | 78.32 ± 7.78        | < 0.001 |
| Triglycerides (mg/dL)              | 137.66 ± 106.39     | 150.08 ±<br>117.11  | 104.81 ± 59.14      | < 0.001 |
| Glucose (mg/dL)                    | 106.22 ± 5.82       | 106.43 ± 5.90       | 105.68 ± 5.56       | < 0.001 |
| Cholesterol (mg/dL)                | 202.40 ± 38.09      | 202.49 ± 38.59      | 202.18 ± 36.74      | 0.642   |
| GGT (U/l)                          | 44.20 ± 55.68       | 48.03 ± 59.07       | 34.08 ± 33.69       | < 0.001 |
| SBP (mmHg)                         | 127.86 ± 16.74      | 130.16 ± 16.10      | 121.79 ± 16.88      | < 0.001 |
| DBP (mmHg)                         | 78.32 ± 11.01       | 79.51 ± 10.94       | 75.18 ± 10.58       | < 0.001 |
| PA (≥150 min/week)                 | 6,892 (41.4%)       | 4,787 (39.6%)       | 2,105 (46.1%)       | < 0.001 |
| Diet (daily fruits and vegetables) | 6,771 (40.7%)       | 4,654 (38.5%)       | 2,117 (46.3%)       | < 0.001 |
| Smoking habit                      |                     |                     |                     | < 0.001 |
| Never                              | 7,645 (45.9%)       | 5,124 (42.4%)       | 2,521 (55.2%)       |         |
| Former                             | 3,549 (21.3%)       | 2,750 (22.8%)       | 799 (17.5%)         |         |
| Current                            | 5,454 (32.8%)       | 4,206 (34.8%)       | 1,248 (27.3%)       |         |

Results are reported as mean ± SD or n (%). BMI, body mass index; WC, waist circumference; GGT,  $\gamma$ -glutamyl transpeptidase; SBP, systolic blood pressure; DBP, diastolic blood pressure PA, physical activity. Continuous variables were compared by Student's t-test, whereas categorical variables were compared by  $\chi^2$  tests.

General characteristic of the study population stratified by gender and FLI categories are shown in Table 2 for men and Table 3 for women. In both men and women,



those with FLI>60 presented a significantly worse anthropometric and biochemical profile, as compared with the other two groups.

Among men, 40.7% presented a FLI>60, 29.5% a FLI 30-60, and 29.8% a FLI <30. As compared to men in the other two categories, those with FLI>60 were older, more obese, and presented higher values of WC, triglycerides, glucose, cholesterol, GGT, SBP, and DBP (all  $p<0.001$ ). Men with FLI<30 consumed more fruits and vegetables daily, and dedicated more time to PA, than men with FLI>60 (all  $p<0.001$ ).

Table 2. Basal anthropometric characteristics and biochemical parameters of men according to FLI categories (n = 12,080).

| Men characteristics                | FLI <30<br>n = 3,605<br>(29.8%)<br>(a) | FLI 30-60<br>n= 3,558<br>(29.5%)<br>(b) | FLI >60<br>n = 4,917<br>(40.7%)<br>(c) | P value | Post-hoc   |
|------------------------------------|----------------------------------------|-----------------------------------------|----------------------------------------|---------|------------|
| Age (years)                        | 41.02 ± 10.66                          | 45.08 ± 9.55                            | 46.34 ± 8.81                           | < 0.001 |            |
| Social class                       |                                        |                                         |                                        | 0.137   | NS         |
| I                                  | 153 (4.2%)                             | 191 (5.4%)                              | 214 (4.4%)                             |         |            |
| II                                 | 559 (15.5%)                            | 554 (15.6%)                             | 789 (16.0%)                            |         |            |
| III                                | 2,893 (80.2%)                          | 2,813 (79.1%)                           | 3,914 (79.6%)                          |         |            |
| BMI (kg/m <sup>2</sup> )           | 23.74 ± 2.24                           | 26.78 ± 2.02                            | 31.41 ± 4.09                           | < 0.001 | a>b>c      |
| BMI categories                     |                                        |                                         |                                        | < 0.001 |            |
| Normal weight                      | 2,616 (72.6%)                          | 603 (16.9%)                             | 81 (1.6%)                              |         | a>b,c; b>c |
| Overweight                         | 980 (27.2%)                            | 2,787 (78.3%)                           | 1,829 (37.2%)                          |         | b>a,c; c>a |
| Obese                              | 9 (0.2%)                               | 168 (4.7%)                              | 3,007 (61.2%)                          |         | b>a; c>a,b |
| WC (cm)                            | 82.67 ± 5.85                           | 89.13 ± 6.06                            | 96.68 ± 6.83                           | < 0.001 | c>b>a      |
| Triglycerides (mg/dL)              | 88.46 ± 37.22                          | 130.95 ± 60.70                          | 209.1-0 ± 153.25                       | < 0.001 | c>b>a      |
| Glucose (mg/dL)                    | 105.56 ± 5.36                          | 106.05 ± 5.63                           | 107.34 ± 6.34                          | < 0.001 | c>b>a      |
| Cholesterol (mg/dL)                | 187.32 ± 34.39                         | 203.72 ± 37.20                          | 212.71 ± 38.95                         | < 0.001 | c>b>a      |
| GGT (UI/l)                         | 23.02 ± 13.22                          | 38.89 ± 31.70                           | 72.98 ± 81.09                          | < 0.001 | c>b>a      |
| SBP (mmHg)                         | 124.08 ± 14.42                         | 129.23 ± 14.63                          | 135.30 ± 16.60                         | < 0.001 | c>b>a      |
| DBP (mmHg)                         | 74.98 ± 10.08                          | 79.03 ± 10.02                           | 83.18 ± 10.86                          | < 0.001 | c>b>a      |
| PA (≥150 min/week)                 | 3,108 (86.2%)                          | 1,425 (40.1%)                           | 254 (5.2%)                             | < 0.001 | a>b,c; b>c |
| Diet (daily fruits and vegetables) | 2,693 (74.7%)                          | 1,372 (38.6%)                           | 589 (12.0%)                            | < 0.001 | a>b,c; b>c |
| Smoking habit                      |                                        |                                         |                                        | < 0.001 |            |
| Never                              | 1,539 (42.7%)                          | 1,571 (44.2%)                           | 2,014 (41.0%)                          |         | b>c        |
| Former                             | 620 (17.2%)                            | 800 (22.5%)                             | 1,330 (27.0%)                          |         | b>a; c>a,b |



|         |               |               |               |       |
|---------|---------------|---------------|---------------|-------|
| Current | 1,446 (40.1%) | 1,187 (33.4%) | 1,573 (32.0%) | a>b,c |
|---------|---------------|---------------|---------------|-------|

Results are reported as mean  $\pm$  SD or n (%). BMI, body mass index; WC, waist circumference; GGT,  $\gamma$ -glutamyl transpeptidase; SBP, systolic blood pressure; DBP, diastolic blood pressure PA, physical activity. Continuous variables were compared by ANOVA, whereas categorical variables were compared by  $\chi^2$  tests.

Among women, 21.7% had a FLI>60, 16.6% a FLI 30-60, and 61.7% a FLI<30. As compared to women in the other two categories, those with FLI>60 were more obese, and had worse anthropometric and biochemical values (WC, triglycerides, glucose, cholesterol, GGT, SBP, and DBP) (all  $p<0.001$ ). Women with FLI<30 also consumed more fruits and vegetables daily, and dedicated more time to PA, than women with FLI>60 (all  $p<0.001$ ).

Table 3. Anthropometric characteristics and biochemical parameters of women according to FLI categories (n = 4,568).

| Women characteristics    | FLI <30<br>n = 2,816<br>(61.7%)<br>(a) | FLI 30-60<br>n = 760<br>(16.6%)<br>(b) | FLI >60<br>n = 992<br>(21.7%)<br>(c) | P value | Post-hoc   |
|--------------------------|----------------------------------------|----------------------------------------|--------------------------------------|---------|------------|
| Age (years)              | 43.91 $\pm$ 10.22                      | 46.55 $\pm$ 9.31                       | 46.20 $\pm$ 9.28                     | < 0.001 | a<b,c      |
| Social class             |                                        |                                        |                                      | <0.01   |            |
| I                        | 131 (4.7%)                             | 27 (3.6%)                              | 25 (2.5%)                            |         | a>c        |
| II                       | 570 (20.2%)                            | 135 (17.8%)                            | 172 (17.3%)                          |         |            |
| III                      | 2,115 (75.1%)                          | 598 (78.7%)                            | 795 (80.1%)                          |         | c>a        |
| BMI (kg/m <sup>2</sup> ) | 24.13 $\pm$ 3.02                       | 29.56 $\pm$ 2.62                       | 35.12 $\pm$ 4.49                     | < 0.001 | c>b>a      |
| BMI categories           |                                        |                                        |                                      | < 0.001 |            |
| Normal weight            | 1,724 (61.2%)                          | 23 (3.0%)                              | 2 (0.2%)                             |         | a>b,c; b>c |
| Overweight               | 1,034 (36.7%)                          | 431 (56.7%)                            | 59 (5.9%)                            |         | a>c; b>a,c |
| Obese                    | 58 (2.1%)                              | 306 (40.3%)                            | 931 (93.9%)                          |         | b>a; c>a,b |
| WC (cm)                  | 74.00 $\pm$ 5.35                       | 82.22 $\pm$ 5.70                       | 87.63 $\pm$ 4.60                     | < 0.001 | c>b>a      |
| Triglycerides (mg/dL)    | 86.33 $\pm$ 35.15                      | 125.00 $\pm$ 60.71                     | 141.83 $\pm$ 84.45                   | < 0.001 | c>b>a      |
| Glucose (mg/dL)          | 105.13 $\pm$ 5.17                      | 105.84 $\pm$ 5.73                      | 107.12 $\pm$ 6.18                    | < 0.001 | c>b>a      |
| Cholesterol (mg/dL)      | 198.09 $\pm$ 36.29                     | 209.10 $\pm$ 35.61                     | 208.52 $\pm$ 37.20                   | < 0.001 | a<b,c      |
| GGT (UI/l)               | 19.21 $\pm$ 12.83                      | 40.74 $\pm$ 29.70                      | 71.16 $\pm$ 45.26                    | < 0.001 | c>b>a      |
| SBP (mmHg)               | 118.28 $\pm$ 15.80                     | 125.42 $\pm$ 16.34                     | 128.98 $\pm$ 17.42                   | < 0.001 | c>b>a      |
| DBP (mmHg)               | 73.25 $\pm$ 10.02                      | 77.25 $\pm$ 10.50                      | 79.08 $\pm$ 10.82                    | < 0.001 | c>b>a      |

|                                    |               |             |             |         |            |
|------------------------------------|---------------|-------------|-------------|---------|------------|
| PA ( $\geq 150$ min/week)          | 2,048 (72.7%) | 55 (7.2%)   | 2 (0.2%)    | < 0.001 | a>b,c; b>c |
| Diet (daily fruits and vegetables) | 1,809 (64.2%) | 188 (24.7%) | 120 (12.1%) | < 0.001 | a>b,c; b>c |
| Smoking habit                      |               |             |             | < 0.001 |            |
| Never                              | 1,526 (54.2%) | 410 (53.9%) | 585 (59.0%) |         | c>a        |
| Former                             | 457 (16.2%)   | 153 (20.1%) | 189 (19.1%) |         | b>a        |
| Current                            | 833 (29.6%)   | 197 (25.9%) | 218 (22.0%) |         | a>c        |

Results are reported as mean  $\pm$  SD or n (%). BMI, body mass index; WC, waist circumference; GGT,  $\gamma$ -glutamyl transpeptidase; SBP, systolic blood pressure; DBP, diastolic blood pressure PA, physical activity. Continuous variables were compared by ANOVA, whereas categorical variables were compared by  $\chi^2$  tests.

Baseline FLI showed a significant correlation with FPG concentration at 5-year follow-up with a Pearson's correlation coefficient of 0.528 ( $p < 0.001$ ) (Figure 1).

**Figure 1** Correlation of Baseline FLI and FPG after 5 years of follow-up.

Of the 16,648 subjects with prediabetes, 3,706 (22.2%) progressed to T2D at 5 years, corresponding to an annual rate of 4.5%. The incidence of T2D after 5 years was similar between men (22.1%) and women (22.6%). When specifically looking at FLI categories, 0.2% (6/3,605) of men and 0.5% (13/2,816) of women in the low-risk group (FLI<30), progressed to T2D, corresponding to an annual rate of 0.04% for men and 0.1% for women. In the intermediate risk group (FLI 30-60), progression to T2D occurred in 4.3% (152/3,558) of men and 24.5% (186/760) in women, corresponding to an annual rate of 0.86% and 4.9%, respectively. Finally, in the high-risk group (FLI>60), incidence of T2D was 51.2% (2,516/4,917) in men and 84.0% (833/992) in women, corresponding to an annual rate of 11.34% and 16.8% respectively. Rates of progression to T2D in men and women according baseline FLI categories are shown in Figure 2.

**Figure 2** Incidence of T2D after 5-year follow-up according to baseline FLI classification.

In bivariate analysis (Table 4), high FLI (>60) was strongly associated with progression to T2D in both genders (HR=24.361; 95% CI 21.020 to 28.233 for men, and HR=17.816; 95% CI 15.400 to 20.611 for women), as were age, social class, BMI,

smoking habits, FPG and SBP. An adjusted cox regression model showed that high FLI scores (>60) remained independently associated with progression to T2D, (adjusted HR=6.879; 95% CI 5.873 to 8.057 for men, and HR=5.806; 95% CI 4.863 to 6.932 for women). BMI was also associated to progression to T2D in both genders after adjustment (HR=1.041; 95% CI 1.036 to 1.045 for men, and HR=1.104; 95% CI 1.036 to 1.045 for women). Some of the evaluated factors also remained significant after adjustment. Performing at least 150 min/week of physical activity (adjusted HR=0.215; 95% CI 0.173 to 0.268 for men, and HR=0.070; 95% CI 0.043 to 0.112 for women) was significantly protective against progression to T2D in both genders. Current male smokers were also less likely to progress to T2D (adjusted HR=0.909; 95% CI 0.834 to 0.991).

**Table 4** Hazard Ratios for progression from prediabetes to T2D

| Variables                          | HR <sub>crude</sub> (95% CI)    |                                 | HR <sub>adjusted</sub> (95% CI) |                              |
|------------------------------------|---------------------------------|---------------------------------|---------------------------------|------------------------------|
|                                    | Men                             | Women                           | Men                             | Women                        |
| Age                                | <b>1.054 (1.051 – 1.058)</b>    | <b>1.035 (1.030 – 1.041)</b>    | <b>1.041 (1.036 - 1.045)</b>    | <b>1.018 (1.011 – 1.026)</b> |
| Social class (Ref: I)              |                                 |                                 |                                 |                              |
| II                                 | <b>1.147 (0.984 – 1.338)</b>    | <b>1.475 (1.102 – 1.974)</b>    | 1.009 (0.839 – 1.212)           | 1.216 (0.818 – 1.809)        |
| III                                | 1.087 (0.994 – 1.251)           | <b>1.845 (1.402 – 2.428)</b>    | 1.005 (0.851 - 1.186)           | 1.170 (0.793 – 1.140)        |
| PA (≥150 min/week)                 | <b>0.037 (0.031 – 0.046)</b>    | <b>0.027 – (0.019 – 0.038)</b>  | <b>0.215 (0.173 - 0.268)</b>    | <b>0.070 (0.043 - 0.112)</b> |
| Diet (daily fruits and vegetables) | <b>0.126 (0.112 – 0.142)</b>    | <b>0.141 (0.120 – 0.166)</b>    | 0.959 (0.843 – 1.091)           | 0.951 (0.793 – 1.140)        |
| Smoking habits (Ref: never smoker) |                                 |                                 |                                 |                              |
| Former                             | <b>1.244 (1.153 – 1.343)</b>    | <b>1.010 (0.875 – 1.165)</b>    | 0.985 (0.904 – 1.072)           | 1.017 (0.873 – 1.184)        |
| Current                            | <b>0.770 (0.719 – 0.824)</b>    | <b>0.714 (0.633 – 0.804)</b>    | <b>0.909 (0.834 - 0.991)</b>    | 0.959 (0.830 – 1.107)        |
| BMI                                | <b>1.174 (1.170 – 1.178)</b>    | <b>1.161 (1.154 – 1.167)</b>    | <b>1.041 (1.036 - 1.045)</b>    | <b>1.104 (1.036 – 1.045)</b> |
| SBP                                | <b>1.023 (1.021 – 1.024)</b>    | <b>1.023 (1.021 – 1.025)</b>    | 0.999 (0.996 - 1.001)           | 1.001 (0.997 – 1.004)        |
| FPG                                | <b>1.037 (1.034 – 1.039)</b>    | <b>1.027 (1.023 – 1.030)</b>    | <b>1.021 (1.018 – 1.024)</b>    | <b>1.018 (1.013 – 1.023)</b> |
| FLI (Ref: FLI < 60)                |                                 |                                 |                                 |                              |
| FLI >60                            | <b>24.361 (21.020 – 28.233)</b> | <b>17.816 (15.400 – 20.611)</b> | <b>6.879 (5.873 – 8.057)</b>    | <b>5.806 (4.863 – 6.932)</b> |

PA, physical activity; BMI, body mass index; SBP, systolic blood pressure; FLI, fatty liver index; FPG, fasting plasma glucose.

## DISCUSSION

The present study aimed to evaluate the possible association between hepatic steatosis, as estimated by FLI, and T2D progression in a large and representative sample of

1  
2  
3 Mediterranean workers with prediabetes. The main finding of the study was that FLI was  
4 a strong independent risk factor for the progression of T2D, in both men and women with  
5 baseline prediabetes, after a 5-year follow-up. Moreover, FLI could preventively identify  
6 subjects at high risk of progression to T2D. Other risk factor associated with progression  
7 T2D were older age, male sex, higher BMI, higher FPG, low consumption of fruits and  
8 vegetables, and performing less than 150 min/week of PA.  
9

10 The results of the present study are in accordance with previous evidence  
11 reporting that NAFLD is a strong predictor of T2D in subjects with prediabetes [37,14].  
12 The baseline prevalence of hepatic steatosis (i.e. FLI>60) in our study population was  
13 35.4%, higher than the 19.3% reported in a Japanese study,[37] lower than the 55.7%  
14 observed in the PREDAPS study,[14] and closer to the 22–40% reported by studies using  
15 ultrasonography-diagnosed NAFLD.[38,39]  
16

17 Patients with a higher FLI score, independently of gender, presented a higher  
18 BMI, a worse cardiometabolic profile and less healthy lifestyle habits. Previous studies  
19 [40] similarly observed that patients with FLI>60 were more metabolically impaired  
20 compared to patients with lower FLI, they also presented a higher risk for MetS, as well  
21 as worse lipid profile. [41] Accordingly, the degree of liver fat content correlates with  
22 MetS components,[42] and that this correlation may be due to NAFLD and T2D sharing  
23 a series of common physiopathological pathways.[43,44]  
24

25 At five-year follow-up, nearly one in four individuals (22.2%) with prediabetes  
26 progressed to T2D resulting in an annual rate of progression of 4.5%. In comparison, the  
27 French IT-DIAB study,[45] a 5-year, prospective observational study reported an annual  
28 progression rate of 7.1%. The study also reported that FLI could predict the risk of  
29 progressing to T2D as well as the possibility of reverting to normoglycemia in clinical  
30 practice, independently of classical glucose parameters. Moreover, normalization of  
31 glycemia was higher in subjects with FLI <30 than in those with higher FLI scores. The  
32 incidence of T2D observed in our study was higher than in previous ones[46–48]  
33 probably due to differences in sociodemographic characteristics between study  
34 populations. The ARIC study,[46] which reported an annual progression rate to T2D of  
35 2.3%, included a higher percentage of women than in our cohort, whereas the ELSA-  
36 Brasil study,[48] which found that the annual progression rate to T2D was 3.5%, included  
37 a higher percentage of subjects with high educational level. On the other hand, the  
38 PREDAPS study[49] showed a similar annual conversion rate (4.2%). The incidence rate  
39 of T2D in our sample was lower than that shown (5.8%) in a previous Korean study [50]  
40  
41  
42  
43  
44  
45  
46  
47  
48  
49  
50  
51  
52  
53  
54  
55  
56  
57  
58  
59  
60

1  
2  
3 of 7,680 subjects who had undergone general routine health evaluations. Nevertheless,  
4 similar to what was observed in our study, 65.5% of the Korean subjects were men, and  
5 male sex was a risk factor for development of T2D in patients with prediabetes.  
6  
7

8 When stratifying for gender, the proportion of women in the FLI >60 category  
9 who progressed to T2D was significantly higher (80%) than the proportion of men in the  
10 same category (50%), at 5-year follow-up. Although women are generally less likely to  
11 suffer from hepatic steatosis,[51] once they do, they might present a higher risk of  
12 developing T2D than males [52]. Genetic predisposition and epigenetic mechanisms,  
13 nutritional components and lifestyle exert effects differently in both sexes. Furthermore,  
14 sexual hormones directly impact on energy metabolism, body composition, inflammatory  
15 cascades and vascular functioning. Particularly, low levels of 17 $\beta$ -estradiol are associated  
16 with increased risk of T2D, independently of established risk factors, including BMI and  
17 insulin resistance.[53] Thus, endocrine imbalances might relate to unfavorable  
18 cardiometabolic traits observable in female sex.[54]  
19  
20  
21  
22  
23  
24  
25  
26

27 Of note, results from our study show an apparently protective effect of smoking  
28 on progression to diabetes. However this could be due to the anorexigenic effect of  
29 tobacco, more than tobacco consumption itself. Smokers are generally leaner than  
30 average as nicotine may affect energy homeostasis and food consumption at brain  
31 level.[55] Accordingly, the proportion of smokers with a lower FLI was higher than that  
32 of smokers in the other two categories.  
33  
34  
35  
36  
37

38 The FLI could be utilized in primary care as a practical tool for early detection of  
39 NAFLD in subjects with prediabetes, while predicting their risk of developing T2D.[56]  
40 This would benefit patients at greater risk, allowing more careful monitoring and  
41 providing an opportunity for early interventions to prevent and reduce both the  
42 progression of hepatic disease and T2D. The present study also highlights the importance  
43 of weight control, promotion of PA and of fruits and vegetables consumption in the  
44 prevention of T2D progression. Determining lifestyle-related factors, particularly PA,  
45 together with repeated anthropometrical measurements in subjects with prediabetes may  
46 be crucial in properly assessing the risks of progression to T2D and of cardiovascular  
47 events.[57]  
48  
49  
50  
51  
52  
53  
54  
55

### 56 **Strengths and limitations**

57  
58 This study had some limitations. First, this work incorporated data from periodic health  
59 assessments performed in the workplace. None of these subjects underwent oral glucose  
60

1  
2  
3 tolerance tests (OGTT), which is considered more sensitive but slightly less specific than  
4 FPG for identifying people at risk of developing T2D.[58] However, the low  
5 reproducibility, high cost, and prolonged time required for this test have limited its use in  
6 clinical practice.[59] Secondly, possible misclassification bias could have occurred as  
7 subjects were categorized as having prediabetes based on a single FPG sample, thus  
8 limiting the possibility to account for intra-individual variability and increasing the  
9 possibility of a regression-toward-the-mean effect, possibly affecting the progression  
10 rate. Thirdly, diet and PA were only not evaluated at baseline, thus lifestyles changes  
11 were not recorded during follow-up, possibly resulting in misclassification bias.  
12 Moreover, specific separate information on fruits and vegetable consumption could not  
13 be assessed, thus limiting the possibility of studying the confounding effect of excessive  
14 fruit consumption on NAFLD risk. Finally, we cannot discard the effect of job-related  
15 confounders such as job stress or the healthy worker effect. The main strengths of this  
16 study were the large sample size (16,648 subjects) and the relatively long follow-up  
17 period. Study participants had multiple occupations and were from several geographical  
18 locations, suggesting that the study population was representative of the Spanish  
19 workforce, although, our results are not applicable to the general population.  
20  
21  
22  
23  
24  
25  
26  
27  
28  
29  
30  
31  
32

### 33 **Clinical implications**

34  
35  
36 This study highlights the importance of FLI as an easily calculated and valuable early  
37 indicator for high risk of T2D in subjects with prediabetes. FLI-based screening could  
38 allow the adoption of effective measures to prevent and reduce the progression of  
39 NAFLD. The workplace could be a feasible setting for implementing diabetes prevention  
40 programs based on early detection and lifestyle changes.  
41  
42  
43  
44  
45  
46  
47

### 48 **CONCLUSION**

49  
50 Because of the progressive nature of NAFLD and the risk of serious consequences, health  
51 care providers should be strongly advised to screen routinely for NAFLD in all subjects  
52 with prediabetes or at risk of T2D. Fatty liver indices are simple clinical tools for  
53 evaluating the extent of liver fat and are predictive of incident diabetes. Concretely, the  
54 FLI is a simple, effective and practical method of stratifying the risk of conversion to  
55 T2D based on the degree of hepatic steatosis. FLI may be useful in routine clinical  
56  
57  
58  
59  
60



practice as an additional screening tool to identify subjects with prediabetes who are at high risk of progression and could benefit from early interventions. Identification of subjects who could benefit from preventive strategies represents an opportunity to assist vulnerable individuals to understand their health risks and encourage them to adopt preventive behaviors.

The workplace may be a feasible setting for the assessment of risk factors, allowing early detection of NAFLD in younger subjects with prediabetes who are likely to progress to T2D and the implementation of T2D prevention programs.

## REFERENCES

- 1 Younossi ZM, Marchesini G, Pinto-Cortez H, *et al.* Epidemiology of Nonalcoholic Fatty Liver Disease and Nonalcoholic Steatohepatitis: Implications for Liver Transplantation. *Transplantation* 2019;**103**:22–7. doi:10.1097/TP.0000000000002484
- 2 Cobbina E, Akhlaghi F. Non-alcoholic fatty liver disease (NAFLD)—pathogenesis, classification, and effect on drug metabolizing enzymes and transporters. *Drug Metab Rev* 2017;**49**:197–211. doi:10.1080/03602532.2017.1293683
- 3 Bellentani S. The epidemiology of non-alcoholic fatty liver disease. *Liver Int* 2017;**37**:81–4. doi:10.1111/liv.13299
- 4 Alisi A, Manco M, Panera N, *et al.* Association between type two diabetes and non-alcoholic fatty liver disease in youth. *Ann Hepatol* 2009;**8**:44–50. doi:10.1016/s1665-2681(19)31826-5
- 5 Anstee QM, Targher G, Day CP. Progression of NAFLD to diabetes mellitus, cardiovascular disease or cirrhosis. *Nat Rev Gastroenterol Hepatol* 2013;**10**:330–44. doi:10.1038/nrgastro.2013.41
- 6 Williams KH, Shackel NA, Gorrell MD, *et al.* Diabetes and nonalcoholic fatty liver disease: A pathogenic duo. *Endocr Rev* 2013;**34**:84–129. doi:10.1210/er.2012-1009
- 7 Herbert Tilg AIM and MR. NAFLD and diabetes mellitus Herbert. *Nat Rev | Gastroenterol Hepatol* © 2017.
- 8 Fujii H, Kawada N. The role of insulin resistance and diabetes in nonalcoholic fatty liver disease. *Int J Mol Sci* 2020;**21**. doi:10.3390/ijms21113863
- 9 Parry SA, Hodson L. Managing NAFLD in Type 2 Diabetes: The Effect of Lifestyle Interventions, a Narrative Review. *Adv Ther* 2020;**37**:1381–406. doi:10.1007/s12325-020-01281-6
- 10 Xia MF, Bian H, Gao X. NAFLD and Diabetes: Two Sides of the Same Coin? Rationale for Gene-Based Personalized NAFLD Treatment. *Front Pharmacol* 2019;**10**:1–11.

- doi:10.3389/fphar.2019.00877
- 11 Kashanian S, Fuchs M. Non-Alcoholic Fatty Liver Disease in Patients with Diabetes Mellitus: A Clinician's Perspective. *Int J Dig Dis* 2015;**01**:1–9. doi:10.4172/2472-1891.100010
- 12 Friedman SL, Neuschwander-Tetri BA, Rinella M, *et al.* Mechanisms of NAFLD development and therapeutic strategies. 2018. doi:10.1038/s41591-018-0104-9
- 13 Tana C, Ballestri S, Ricci F, *et al.* Cardiovascular Risk in Non-Alcoholic Fatty Liver Disease : Mechanisms and Therapeutic Implications. *Int J Environ Res Public Health* 2019;**16**:3104.10.3390/ijerph16173104
- 14 Franch-Nadal J, Caballeria L, Mata-Cases M, *et al.* Fatty liver index is a predictor of incident diabetes in patients with prediabetes: The PREDAPS study. *PLoS One* 2018;**13**:1–17. doi:10.1371/journal.pone.0198327
- 15 Caballería L, Antonia MA, Torán P, *et al.* Prevalence and factors associated with the presence of non alcoholic fatty liver disease in an apparently healthy adult population in primary care units. *BMC Gastroenterol* 2007;**7**:1–6. doi:10.1186/1471-230X-7-41
- 16 Hazlehurst JM, Woods C, Marjot T, *et al.* Non-alcoholic fatty liver disease and diabetes. *Metabolism* 2016;**65**:1096–108. doi:10.1016/j.metabol.2016.01.001
- 17 Falguera M, Vilanova MB, Alcubierre N, *et al.* Prevalence of pre-diabetes and undiagnosed diabetes in the Mollerussa prospective observational cohort study rural area of Catalonia in a semi- rural area of catalonia. *BMJ Open* 2019;**10**:1–9. doi:10.1136/bmjopen-2019-033332
- 18 Sanyal AJ. Past, present and future perspectives in nonalcoholic fatty liver disease. *Nat Rev Gastroenterol Hepatol* 2019;**16**:377–86. doi:10.1038/s41575-019-0144-8
- 19 Jäger S, Jacobs S, Kröger J, *et al.* Association between the fatty liver index and risk of type 2 diabetes in the EPIC-Potsdam study. *PLoS One* 2015;**10**:1–14. doi:10.1371/journal.pone.0124749
- 20 Anstee QM, Targher G, Day CP. Progression of NAFLD to diabetes mellitus, cardiovascular disease or cirrhosis. *Nat Rev Gastroenterol Hepatol* 2013;**10**:330–44. doi:10.1038/nrgastro.2013.41
- 21 Wieckowska A, Feldstein AE. Diagnosis of nonalcoholic fatty liver disease: Invasive versus noninvasive. *Semin Liver Dis* 2008;**28**:386–95. doi:10.1055/s-0028-1091983
- 22 Papagianni M, Sofogianni A, Tziomalos K. Non-invasive methods for the diagnosis of nonalcoholic fatty liver disease. *World J Hepatol* 2015;**7**:638–48. doi:10.4254/wjh.v7.i4.638
- 23 Bedogni G, Bellentani S, Miglioli L, *et al.* The fatty liver index: A simple and accurate predictor of hepatic steatosis in the general population. *BMC Gastroenterol* 2006;**6**:1–7. doi:10.1186/1471-230X-6-33



- 1  
2  
3 24 Dyson JK, Anstee QM, McPherson S. Non-alcoholic fatty liver disease: a practical  
4 approach to diagnosis and staging. *Frontline Gastroenterol* 2014;**5**:211–8.  
5  
6 doi:10.1136/flgastro-2013-100403  
7  
8 25 Lee JH, Kim D, Kim HJ, *et al.* Hepatic steatosis index: A simple screening tool  
9 reflecting nonalcoholic fatty liver disease. *Dig Liver Dis* 2010;**42**:503–8.  
10  
11 doi:10.1016/j.dld.2009.08.002  
12  
13 26 Wang J, Li P, Jiang Z, *et al.* Diagnostic value of alcoholic liver disease (ALD)/  
14 nonalcoholic fatty liver disease (NAFLD) index combined with  $\gamma$ -glutamyl transferase in  
15 differentiating ALD and NAFLD. *Korean J Intern Med* 2016;**31**:479–87.  
16  
17 doi:10.3904/kjim.2015.253  
18  
19 27 Rotter I, Rył A, Szylińska A, *et al.* Lipid Accumulation Product (LAP) as an Index of  
20 Metabolic and Hormonal Disorders in Aging Men. *Exp Clin Endocrinol Diabetes*  
21  
22 2017;**125**:176–82. doi:10.1055/s-0042-116071  
23  
24 28 Poynard T, Lassailly G, Diaz E, *et al.* Performance of biomarkers FibroTest, ActiTest,  
25 SteatoTest, and NashTest in patients with severe obesity: Meta analysis of individual  
26 patient data. *PLoS One* 2012;**7**:1–8. doi:10.1371/journal.pone.0030325  
27  
28 29 Ayensa-vazquez JA, Leiva A, Tauler P, *et al.* Agreement between Type 2 Diabetes Risk  
29 Scales in a Caucasian Population : A Systematic Review and Report. *J Clin Med*  
30  
31 2020;**9**:1–19.  
32  
33 30 Calori G, Lattuada G, Ragogna F, *et al.* Fatty liver index and mortality: The cremona  
34 study in the 15th year of follow-up. *Hepatology* 2011;**54**:145–52. doi:10.1002/hep.24356  
35  
36 31 Zhou K, Cen J. The fatty liver index (FLI) and incident hypertension: A longitudinal  
37 study among Chinese population. *Lipids Health Dis* 2018;**17**:1–7. doi:10.1186/s12944-  
38  
39 018-0858-6  
40  
41 32 Bennisar-Veny M, Fresneda S, López-González A, *et al.* Lifestyle and Progression to  
42 Type 2 Diabetes in a Cohort of Workers with Prediabetes. *Nutrients* 2020;**12**:1–13.  
43  
44 doi:10.3390/nu12051538  
45  
46 33 American Diabetes Association, Association AD. 1. American Diabetes Association.  
47 Diagnosis and Classification of Diabetes Mellitus. *Diabetes Care* [Internet]. 2012 Jan 1  
48 [cited 2018 Jan 25];**35**(Supplement\_1):S64–71. Available from:  
49  
50 <http://www.ncbi.nlm.nih.gov/pubmed/22187472>Diagnosis and Classification. *Diabetes*  
51  
52 *Care* 2012;**35**:64–71. doi:10.2337/dc12-s064  
53  
54 34 Domingo-Salvany A, Bacigalupe A, Carrasco JM, *et al.* Propuestas de clase social  
55 neoweberiana y neomarxista a partir de la Clasificación Nacional de Ocupaciones 2011.  
56  
57 *Gac Sanit* 2013;**27**:263–72. doi:10.1016/j.gaceta.2012.12.009  
58  
59 35 Stewart A, Marfell-Jones M, Olds T de RH. *International standards for anthropometric*  
60  
61 *assessment. ISAK*. 3rd ed. Lower Hutt, New Zealand: 2011.

- 1  
2  
3 36 Care D, Suppl SS. Classification and diagnosis of diabetes: Standards of medical care in  
4 diabetes-2021. *Diabetes Care* 2021;**44**:S15–33. doi:10.2337/dc21-S002  
5  
6 37 Nishi T, Babazono A, Maeda T, *et al.* Evaluation of the fatty liver index as a predictor  
7 for the development of diabetes among insurance beneficiaries with prediabetes. *J*  
8 *Diabetes Investig* 2015;**6**:309–16. doi:10.1111/jdi.12290  
9  
10  
11 38 Bae JC, Rhee EJ, Lee WY, *et al.* Combined effect of nonalcoholic fatty liver disease and  
12 impaired fasting glucose on the development of type 2 diabetes: A 4-year retrospective  
13 longitudinal study. *Diabetes Care* 2011;**34**:727–9. doi:10.2337/dc10-1991  
14  
15 39 Wong VWS, Hui AY, Tsang SWC, *et al.* Prevalence of undiagnosed diabetes and  
16 postchallenge hyperglycaemia in Chinese patients with non-alcoholic fatty liver disease.  
17 *Aliment Pharmacol Ther* 2006;**24**:1215–22. doi:10.1111/j.1365-2036.2006.03112.x  
18  
19 40 Leutner M, Göbl C, Schlager O, *et al.* The Fatty Liver Index (FLI) Relates to Diabetes-  
20 Specific Parameters and an Adverse Lipid Profile in a Cohort of Nondiabetic,  
21 Dyslipidemic Patients. *J Am Coll Nutr* 2017;**36**:287–94.  
22 doi:10.1080/07315724.2016.1262802  
23  
24 41 Rogulj D, Konjevoda P, Milić M, *et al.* Fatty liver index as an indicator of metabolic  
25 syndrome. *Clin Biochem* 2012;**45**:68–71. doi:10.1016/j.clinbiochem.2011.10.014  
26  
27 42 Lonardo A, Ballestri S, Marchesini G, *et al.* Nonalcoholic fatty liver disease: A  
28 precursor of the metabolic syndrome. *Dig Liver Dis* 2015;**47**:181–90.  
29 doi:10.1016/j.dld.2014.09.020  
30  
31 43 Saponaro C, Gaggini M, Gastaldelli A. Nonalcoholic Fatty Liver Disease and Type 2  
32 Diabetes: Common Pathophysiologic Mechanisms. *Curr Diab Rep* 2015;**15**:1–13.  
33 doi:10.1007/s11892-015-0607-4  
34  
35 44 Forlani G, Giorda C, Manti R, *et al.* The Burden of NAFLD and Its Characteristics in a  
36 Nationwide Population with Type 2 Diabetes. *J Diabetes Res* 2016;:1–9.  
37 doi:10.1155/2016/2931985  
38  
39 45 Wargny M, Smati S, Pichelin M, *et al.* Fatty liver index is a strong predictor of changes  
40 in glycemic status in people with prediabetes: The IT-DIAB study. *PLoS One*  
41 2019;**14**:1–14. doi:10.1371/journal.pone.0221524  
42  
43 46 Selvin E, Steffes MW, Gregg E, *et al.* Performance of A1C for the classification and  
44 prediction of diabetes. *Diabetes Care* 2011;**34**:84–9. doi:10.2337/dc10-1235  
45  
46 47 Giráldez-García C, María Hernández A, Gamarra J, *et al.* Evolución de pacientes con  
47 prediabetes en Atención Primaria de Salud (PREDAPS): resultados del quinto año de  
48 seguimiento. *Diabetes Práctica* 2018;**09**:37–80.  
49 doi:10.26322/2013.7923.1505400455.03  
50  
51 48 Schmidt MI, Bracco PA, Yudkin JS, *et al.* Intermediate hyperglycaemia to predict  
52 progression to type 2 diabetes (ELSA-Brasil): an occupational cohort study in Brazil.  
53  
54  
55  
56  
57  
58  
59  
60

- 1  
2  
3 *Lancet Diabetes Endocrinol* 2019;**7**:267–77. doi:10.1016/S2213-8587(19)30058-0
- 4  
5 49 Giráldez-García C, García-Soidán FJ, Serrano Martín R, *et al.* Evolución de pacientes  
6 con prediabetes en Atención Primaria de Salud (PREDAPS): resultados del primer año  
7 de seguimiento. *Diabetes Práctica* 2014;**05**:1–48.
- 8  
9 50 Jung CH, Lee WJ, Hwang JY, *et al.* Assessment of the fatty liver index as an indicator of  
10 hepatic steatosis for predicting incident diabetes independently of insulin resistance in a  
11 korean population. *Diabet Med* 2013;**30**:428–35. doi:10.1111/dme.12104
- 12  
13  
14 51 Ballestri S, Nascimbeni F, Baldelli E, *et al.* NAFLD as a Sexual Dimorphic Disease:  
15 Role of Gender and Reproductive Status in the Development and Progression of  
16 Nonalcoholic Fatty Liver Disease and Inherent Cardiovascular Risk. *Adv Ther*  
17 2017;**34**:1291–326. doi:10.1007/s12325-017-0556-1
- 18  
19  
20 52 Tokita Y, Maejima Y, Shimomura K, *et al.* Non-alcoholic fatty liver disease is a risk  
21 factor for type 2 diabetes in middle-aged Japanese men and women. *Intern Med*  
22 2017;**56**:763–71. doi:10.2169/internalmedicine.56.7115
- 23  
24  
25 53 Mauvais-Jarvis F. Is estradiol a biomarker of type 2 diabetes risk in postmenopausal  
26 women? *Diabetes* 2017;**66**:568–70. doi:10.2337/dbi16-0063
- 27  
28  
29 54 Kautzky-Willer A, Harreiter J, Pacini G. Sex and gender differences in risk,  
30 pathophysiology and complications of type 2 diabetes mellitus. *Endocr Rev*  
31 2016;**37**:278–316. doi:10.1210/er.2015-1137
- 32  
33  
34 55 Andrea Stojakovic, Emma P. Espinosa OTF and KL. Effects of nicotine on homeostatic  
35 and hedonic components of food intake. *J Endocrinol* 2017;**235**:R13–R31.  
36 doi:doi:10.1530/JOE-17-0166.
- 37  
38 56 Ciardullo S, Muraca E, Perra S, *et al.* Screening for non-alcoholic fatty liver disease in  
39 type 2 diabetes using non-invasive scores and association with diabetic complications.  
40 *BMJ Open Diabetes Res Care* 2020;**8**:1–9. doi:10.1136/bmjdr-2019-000904
- 41  
42  
43 57 Vistisen D, Witte DR, Brunner EJ, *et al.* Risk of cardiovascular disease and death in  
44 individuals with prediabetes defined by different criteria: The whitehall II study.  
45 *Diabetes Care* 2018;**41**:899–906. doi:10.2337/dc17-2530
- 46  
47  
48 58 Unwin N, Shaw J, Zimmet P, *et al.* Impaired glucose tolerance and impaired fasting  
49 glycaemia: the current status on definition and intervention. *Diabet Med* 2002;**19**:708–  
50 23. doi:10.1046/j.1464-5491.2002.00835.x
- 51  
52  
53 59 Clark Perry R, Ravi Shankar R, Fineberg N, *et al.* HbA1c measurement improves the  
54 detection of type 2 diabetes in high-risk individuals with nondiagnostic levels of fasting  
55 plasma glucose: The early diabetes intervention program (EDIP). *Diabetes Care*  
56 2001;**24**:465–71. doi:10.2337/diacare.24.3.465
- 57  
58  
59  
60

1  
2  
3 **Acknowledgements** The authors are grateful to the field staff and participants of this  
4 study.  
5  
6  
7

8 **Contributors** CB, MBV, AL, AA and AMY were responsible for the conception and  
9 design of the study. AL, SF and AA acquired the data, supervised the study and had full  
10 access to all study data. CB, MBV and AMY analyzed and interpreted the data and drafted  
11 the manuscript. SF, AL and AA participated in critical revision of the manuscript for  
12 important intellectual content. All authors read and approved the final version of the  
13 manuscript.  
14  
15  
16  
17  
18

19 **Funding** This project was funded by the Carlos III Health Institute (Ministry of  
20 Economy and Competitiveness, Spain) through the Network for Prevention and Health  
21 Promotion in Primary Care (redIAPP, RD16/0007/008), and by European Union ERDF  
22 funds.  
23  
24  
25  
26  
27

28 **Competing interests** The authors declare that there are no competing interests.  
29  
30

31 **Data sharing statement** Data are available upon reasonable request. Readers may  
32 contact Dr. Arturo Lopez (angarturo@gmail.com) regarding the data. No additional data  
33 are available.  
34  
35  
36  
37  
38  
39  
40  
41  
42  
43  
44  
45  
46  
47  
48  
49  
50  
51  
52  
53  
54  
55  
56  
57  
58  
59  
60

1  
2  
3  
4  
5  
6  
7  
8  
9  
10  
11  
12  
13  
14  
15  
16  
17  
18  
19  
20  
21  
22  
23  
24  
25  
26  
27  
28  
29  
30  
31  
32  
33  
34  
35  
36  
37  
38  
39  
40  
41  
42  
43  
44  
45  
46  
47  
48  
49  
50  
51  
52  
53  
54  
55  
56  
57  
58  
59  
60



Figure 1

539x364mm (72 x 72 DPI)

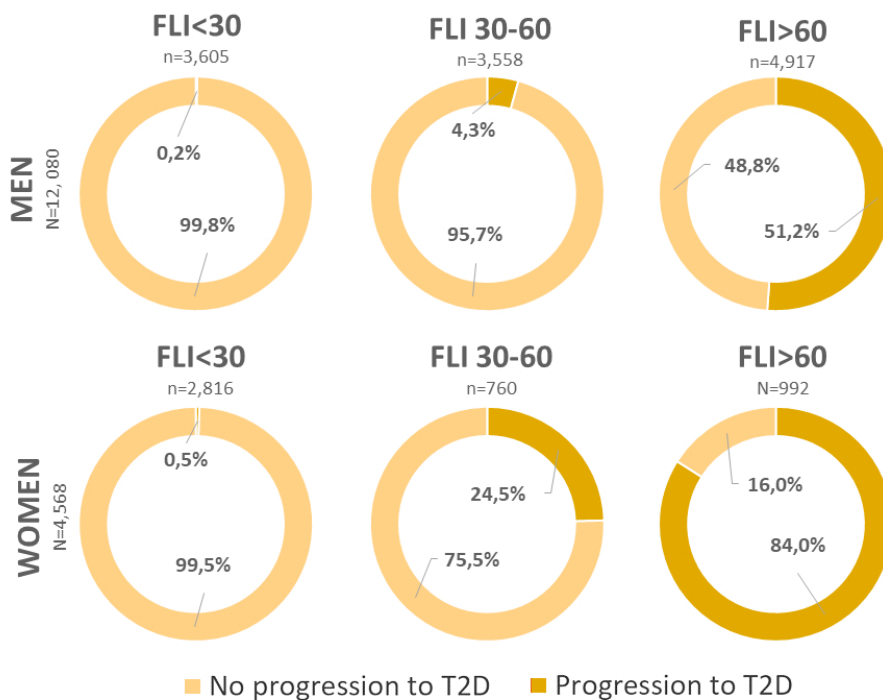

Figure 2

254x190mm (96 x 96 DPI)

STROBE Statement—Checklist of items that should be included in reports of *cohort studies*

|                              | Item No | Recommendation                                                                                                                                                                                                                                                                                                         | Page No |
|------------------------------|---------|------------------------------------------------------------------------------------------------------------------------------------------------------------------------------------------------------------------------------------------------------------------------------------------------------------------------|---------|
| <b>Title and abstract</b>    | 1       | (a) Indicate the study's design with a commonly used term in the title or the abstract<br>(b) Provide in the abstract an informative and balanced summary of what was done and what was found                                                                                                                          | 1-2     |
| <b>Introduction</b>          |         |                                                                                                                                                                                                                                                                                                                        |         |
| Background/rationale         | 2       | Explain the scientific background and rationale for the investigation being reported                                                                                                                                                                                                                                   | 3-4     |
| Objectives                   | 3       | State specific objectives, including any prespecified hypotheses                                                                                                                                                                                                                                                       | 4       |
| <b>Methods</b>               |         |                                                                                                                                                                                                                                                                                                                        |         |
| Study design                 | 4       | Present key elements of study design early in the paper                                                                                                                                                                                                                                                                | 4       |
| Setting                      | 5       | Describe the setting, locations, and relevant dates, including periods of recruitment, exposure, follow-up, and data collection                                                                                                                                                                                        | 4-5     |
| Participants                 | 6       | (a) Give the eligibility criteria, and the sources and methods of selection of participants. Describe methods of follow-up<br>(b) For matched studies, give matching criteria and number of exposed and unexposed                                                                                                      | 4       |
| Variables                    | 7       | Clearly define all outcomes, exposures, predictors, potential confounders, and effect modifiers. Give diagnostic criteria, if applicable                                                                                                                                                                               | 6-7     |
| Data sources/<br>measurement | 8*      | For each variable of interest, give sources of data and details of methods of assessment (measurement). Describe comparability of assessment methods if there is more than one group                                                                                                                                   | 6-7     |
| Bias                         | 9       | Describe any efforts to address potential sources of bias                                                                                                                                                                                                                                                              | 14      |
| Study size                   | 10      | Explain how the study size was arrived at                                                                                                                                                                                                                                                                              | -       |
| Quantitative variables       | 11      | Explain how quantitative variables were handled in the analyses. If applicable, describe which groupings were chosen and why                                                                                                                                                                                           |         |
| Statistical methods          | 12      | (a) Describe all statistical methods, including those used to control for confounding<br>(b) Describe any methods used to examine subgroups and interactions<br>(c) Explain how missing data were addressed<br>(d) If applicable, explain how loss to follow-up was addressed<br>(e) Describe any sensitivity analyses | 7       |
| <b>Results</b>               |         |                                                                                                                                                                                                                                                                                                                        |         |
| Participants                 | 13*     | (a) Report numbers of individuals at each stage of study—eg numbers potentially eligible, examined for eligibility, confirmed eligible, included in the study, completing follow-up, and analysed<br>(b) Give reasons for non-participation at each stage<br>(c) Consider use of a flow diagram                        | 8       |
| Descriptive data             | 14*     | (a) Give characteristics of study participants (eg demographic, clinical, social) and information on exposures and potential confounders<br>(b) Indicate number of participants with missing data for each variable of interest<br>(c) Summarise follow-up time (eg, average and total amount)                         | 9       |
| Outcome data                 | 15*     | Report numbers of outcome events or summary measures over time                                                                                                                                                                                                                                                         | -       |



|    |                          |    |                                                                                                                                                                                                              |       |
|----|--------------------------|----|--------------------------------------------------------------------------------------------------------------------------------------------------------------------------------------------------------------|-------|
| 1  | Main results             | 16 | (a) Give unadjusted estimates and, if applicable, confounder-adjusted estimates and their precision (eg, 95% confidence interval). Make clear which confounders were adjusted for and why they were included | 10-11 |
| 2  |                          |    | (b) Report category boundaries when continuous variables were categorized                                                                                                                                    |       |
| 3  |                          |    | (c) If relevant, consider translating estimates of relative risk into absolute risk for a meaningful time period                                                                                             |       |
| 4  |                          |    |                                                                                                                                                                                                              |       |
| 5  |                          |    |                                                                                                                                                                                                              |       |
| 6  |                          |    |                                                                                                                                                                                                              |       |
| 7  |                          |    |                                                                                                                                                                                                              |       |
| 8  |                          |    |                                                                                                                                                                                                              |       |
| 9  | Other analyses           | 17 | Report other analyses done—eg analyses of subgroups and interactions, and sensitivity analyses                                                                                                               | -     |
| 10 |                          |    |                                                                                                                                                                                                              |       |
| 11 | <b>Discussion</b>        |    |                                                                                                                                                                                                              |       |
| 12 |                          |    |                                                                                                                                                                                                              |       |
| 13 | Key results              | 18 | Summarise key results with reference to study objectives                                                                                                                                                     | 12    |
| 14 | Limitations              | 19 | Discuss limitations of the study, taking into account sources of potential bias or imprecision. Discuss both direction and magnitude of any potential bias                                                   | 14    |
| 15 |                          |    |                                                                                                                                                                                                              |       |
| 16 | Interpretation           | 20 | Give a cautious overall interpretation of results considering objectives, limitations, multiplicity of analyses, results from similar studies, and other relevant evidence                                   | 12-14 |
| 17 |                          |    |                                                                                                                                                                                                              |       |
| 18 |                          |    |                                                                                                                                                                                                              |       |
| 19 | Generalisability         | 21 | Discuss the generalisability (external validity) of the study results                                                                                                                                        | 14    |
| 20 |                          |    |                                                                                                                                                                                                              |       |
| 21 | <b>Other information</b> |    |                                                                                                                                                                                                              |       |
| 22 | Funding                  | 22 | Give the source of funding and the role of the funders for the present study and, if applicable, for the original study on which the present article is based                                                | 19    |
| 23 |                          |    |                                                                                                                                                                                                              |       |
| 24 |                          |    |                                                                                                                                                                                                              |       |

\*Give information separately for exposed and unexposed groups.

**Note:** An Explanation and Elaboration article discusses each checklist item and gives methodological background and published examples of transparent reporting. The STROBE checklist is best used in conjunction with this article (freely available on the Web sites of PLoS Medicine at <http://www.plosmedicine.org/>, Annals of Internal Medicine at <http://www.annals.org/>, and Epidemiology at <http://www.epidem.com/>). Information on the STROBE Initiative is available at <http://www.strobe-statement.org>.



# BMJ Open

## Fatty liver index and progression to type 2 diabetes: a five-year longitudinal study in Spanish workers with prediabetes

|                                 |                                                                                                                                                                                                                                                                                                                                                                                                                                                                                                                    |
|---------------------------------|--------------------------------------------------------------------------------------------------------------------------------------------------------------------------------------------------------------------------------------------------------------------------------------------------------------------------------------------------------------------------------------------------------------------------------------------------------------------------------------------------------------------|
| Journal:                        | <i>BMJ Open</i>                                                                                                                                                                                                                                                                                                                                                                                                                                                                                                    |
| Manuscript ID                   | bmjopen-2020-045498.R2                                                                                                                                                                                                                                                                                                                                                                                                                                                                                             |
| Article Type:                   | Original research                                                                                                                                                                                                                                                                                                                                                                                                                                                                                                  |
| Date Submitted by the Author:   | 14-Jul-2021                                                                                                                                                                                                                                                                                                                                                                                                                                                                                                        |
| Complete List of Authors:       | Busquets-Cortés, Carla; University of the Balearic Islands, Nursing and Physiotherapy Department<br>Bennasar-Veny, Miquel; University of the Balearic Islands, Nursing and Physiotherapy Department<br>López-González, Angel-Arturo; Balearic Islands Health Services<br>Fresneda, Sergio; University of the Balearic Islands, Nursing and Physiotherapy Department<br>Aguiló, Antoni; University of the Balearic Islands<br>Yanez, Aina; University of the Balearic Islands, Nursing and Physiotherapy Department |
| <b>Primary Subject Heading</b>: | Diabetes and endocrinology                                                                                                                                                                                                                                                                                                                                                                                                                                                                                         |
| Secondary Subject Heading:      | Diabetes and endocrinology, Epidemiology                                                                                                                                                                                                                                                                                                                                                                                                                                                                           |
| Keywords:                       | DIABETES & ENDOCRINOLOGY, NUTRITION & DIETETICS, PRIMARY CARE, OCCUPATIONAL & INDUSTRIAL MEDICINE                                                                                                                                                                                                                                                                                                                                                                                                                  |
|                                 |                                                                                                                                                                                                                                                                                                                                                                                                                                                                                                                    |

SCHOLARONE™  
Manuscripts



I, the Submitting Author has the right to grant and does grant on behalf of all authors of the Work (as defined in the below author licence), an exclusive licence and/or a non-exclusive licence for contributions from authors who are: i) UK Crown employees; ii) where BMJ has agreed a CC-BY licence shall apply, and/or iii) in accordance with the terms applicable for US Federal Government officers or employees acting as part of their official duties; on a worldwide, perpetual, irrevocable, royalty-free basis to BMJ Publishing Group Ltd ("BMJ") its licensees and where the relevant Journal is co-owned by BMJ to the co-owners of the Journal, to publish the Work in this journal and any other BMJ products and to exploit all rights, as set out in our [licence](#).

The Submitting Author accepts and understands that any supply made under these terms is made by BMJ to the Submitting Author unless you are acting as an employee on behalf of your employer or a postgraduate student of an affiliated institution which is paying any applicable article publishing charge ("APC") for Open Access articles. Where the Submitting Author wishes to make the Work available on an Open Access basis (and intends to pay the relevant APC), the terms of reuse of such Open Access shall be governed by a Creative Commons licence – details of these licences and which [Creative Commons](#) licence will apply to this Work are set out in our licence referred to above.

Other than as permitted in any relevant BMJ Author's Self Archiving Policies, I confirm this Work has not been accepted for publication elsewhere, is not being considered for publication elsewhere and does not duplicate material already published. I confirm all authors consent to publication of this Work and authorise the granting of this licence.

1  
2  
3  
4 **Fatty liver index and progression to type 2 diabetes: a five-year longitudinal study**  
5 **in Spanish workers with prediabetes**  
6  
7

8 Carla Busquets-Cortés,<sup>1,2</sup> Miquel Bannasar-Veny,<sup>1,3\*</sup> Arturo López-González,<sup>2,4</sup> Sergio  
9 Fresneda,<sup>1,3</sup> Antoni Aguiló,<sup>1,3</sup> Aina M. Yáñez<sup>3,5</sup>  
10  
11

12  
13  
14 <sup>1</sup>Research Group on Evidence, Lifestyles & Health, Instituto de Investigación Sanitaria  
15 Illes Balears, Palma, Illes Balears, Spain  
16

17 <sup>2</sup>Escuela Universitaria ADEMA, Palma, Spain  
18

19 <sup>3</sup>Department of Nursing and Physiotherapy, Balearic Islands University, Palma, Illes  
20 Balears, Spain  
21

22 <sup>4</sup>Prevention of Occupational Risks in Health Services, Balearic Islands Health Service,  
23 Palma, Spain  
24

25 <sup>5</sup>Global Health and Human Development Research Group, Balearic Islands University,  
26 Palma, Illes Balears, Spain  
27  
28

29  
30  
31 **Corresponding author:** Miquel Bannasar-Veny, Nursing and Physiotherapy  
32 Department, Universitat de les Illes Balears, Cra. de Valldemossa km 7,5 Palma 07122,  
33 Spain. E-mail: [miquel.bannasar@uib.es](mailto:miquel.bannasar@uib.es) Telephone number: +34 971 172367  
34  
35

36  
37  
38  
39 **Key words:** Conversion, Fatty Liver Index, Non-alcoholic Fatty Liver Disease, Fasting  
40 Plasma Glucose, Prediabetes, Type 2 Diabetes.  
41  
42  
43  
44  
45

46 **Word count** (excluding title page, abstract, references, figures and tables): 3,722 words  
47  
48  
49  
50  
51  
52  
53  
54  
55  
56  
57  
58  
59  
60

## ABSTRACT

**Objective:** The main aim of the study was to evaluate the association between non-alcoholic fatty liver disease (NAFLD), estimated by fatty liver index (FLI), and the development of type 2 diabetes (T2D) in a large cohort of adult workers with prediabetes.

**Design:** Prospective cohort study.

**Setting:** Occupational health services from Spain.

**Participants:** 16,648 adult workers (aged 20 to 65 years) with prediabetes (fasting plasma glucose (FPG) of 100-125 mg/dl).

**Outcome and measures:** FLI was calculated based on measurements of triglycerides, body mass index, waist circumference and  $\gamma$ -glutamyltransferase. The population was classified into three categories: FLI <30 (no hepatic steatosis), FLI 30–60 (intermediate status), and FLI >60 (hepatic steatosis). Sociodemographic, anthropometric, dietary habits, physical activity and clinical data were collected from all subjects. The incidence rate of T2D was determined after 5 years of follow-up.

**Results:** After 5 years of follow-up, 3,706 of the 16,648 participants (22.2%) were diagnosed with T2D, corresponding to an annual rate of progression of 4.5%. FLI was strongly associated with T2D conversion. The incidence rates of T2D in the FLI <30, FLI 30-60 and FLI >60 groups were significantly different after 5 years of follow-up were 19/6,421 (0.3%), 338/4,318 (7.8%) and 3,349/5,909 (56.7%), respectively. This association remained significant for FLI >60 after adjustment for, age, diet, physical activity, FPG, blood pressure, social class and smoking habits (adjusted HR=6.879; 95% CI 5.873 to 8.057 for men, and HR=5.806; 95% CI 4.863 to 6.932 for women).

**Conclusion:** NAFLD assessed by FLI independently predicted the risk of conversion to T2D among people with prediabetes. FLI may be an easily determined and valuable early predictor for T2D in people with prediabetes. FLI-based assessment of NAFLD in subjects with prediabetes in routine clinical practice could allow the adoption of effective measures to prevent and reduce their progression to T2D.

### Strengths and limitations of this study

- This is a prospective study, with large sample size and 5-years follow-up.
- Study participants had multiple occupations and were from several geographical locations.
- The study sample included only adult workers therefore the results cannot be generalized to the general population.

For peer review only

## INTRODUCTION

Type 2 Diabetes (T2D) is closely associated with a constellation of metabolic comorbidities, including obesity, hypertension, hypercholesterolemia, dyslipidemia and non-alcoholic fatty liver disease (NAFLD).[1] The main characteristic of NAFLD is the infiltration of hepatocytes by free fatty acids and triglycerides not related to significant alcohol intake. NAFLD is an entity that encompasses a wide spectrum of lesions ranging from indolent liver fat storage followed by lipotoxicity,[2] to hepatic inflammation, also known as non-alcoholic steatohepatitis (NASH). NAFLD is the most common chronic liver disease worldwide that is associated with excess health-related expenditures, making it a community health problem.[3]

Mounting evidence indicates a close association between the pathogenesis of T2D and NAFLD;[4–8] evidence suggests a complex bidirectional relationship, whereby presence of one leads to the progression of the other.[9] The presence of NAFLD increases the incidence of T2D, while diabetes might contribute to the worsening of NAFLD to more advanced stages such as steatohepatitis and even hepatocellular carcinoma.[10]

NAFLD is strongly associated with insulin resistance such that prevalence of NAFLD is 5-fold higher in patients with T2D compared to those without.[8] Recent data showed that there is a solid genetic basis that support their association, since gene variants in numerous proteins related to lipid and glucose metabolism, appear to significantly raise the risk of NAFLD and T2D.[10,11] These genetic abnormalities are directly linked to hepatic and peripheral insulin resistance, resulting in a deficient inhibition of hepatic gluconeogenesis, diminished glycogen synthesis and increased extrahepatic lipid accumulation. Other mechanisms underlying these NAFLD-T2D pathogenic duo involve excessive hepatic fat accumulation, diverse alterations in energy metabolism, altered microbiome, comorbidities, increased reactive oxygen species production and inflammatory signals derived from different cell types including immune cells, such as proinflammatory cytokines.[12]

The estimated overall worldwide prevalence of NAFLD in the general adult population is about 25–30%,[3,13] but ranges from 40%–70% in subjects with established T2D.[14,15] In fact, NAFLD and T2D are conditions that frequently coexist

1  
2  
3 and can act synergistically to drive adverse outcomes.[16] NAFLD is considered the  
4 hepatic manifestation of metabolic syndrome (MetS)[17] because epidemiological  
5 studies have consistently shown that NAFLD is strongly linked to obesity, dyslipidemia,  
6 and insulin resistance.[18,19] Therefore, NAFLD is thought to be an independent risk  
7 factor for incident T2D[16] and cardiovascular disease.[20]  
8  
9

10  
11  
12  
13 Liver biopsy is currently the gold standard for diagnosing progressive  
14 NAFLD.[21] Biopsies are invasive procedures with several drawbacks, including  
15 sampling error, interobserver variability, high cost, patient discomfort and risk of  
16 complications.[14] Moreover, obtaining liver biopsies from all patients with NAFLD is  
17 unrealistic. Abdominal ultrasonography is a simple, inexpensive, widely available and  
18 minimally invasive technique that is used to diagnose fatty liver in most subjects.  
19 However, its sensitivity is low in subjects with fatty retention less than 20%–30% and it  
20 does not provide information on the degree of fibrosis.[22] Consequently, attempts have  
21 been made to diagnose NAFLD/NASH using clinical and laboratory-based biomarkers  
22 and scoring systems that can predict fatty changes in the liver. These indices for the  
23 diagnosis of NAFLD/NASH include the fatty liver index (FLI),[23] NAFLD liver fat  
24 score,[24] the hepatic steatosis index (HSI),[25] the ALD/NAFLD index (ANI),[26] the  
25 lipid accumulation product (LAP)[27] and the SteatoTest (ST).[28] These indices require  
26 the measurement of patient characteristics, including concentrations of triglycerides  
27 (TG),  $\gamma$ -glutamyl transpeptidase (GGT), aspartate aminotransferase (AST), alanine  
28 transaminase (ALT), insulin, body mass index (BMI), waist circumference (WC), gender,  
29 mean corpuscular value and presence or absence of T2D or metabolic syndrome.[29] The  
30 FLI is a simple and accurate algorithm that combines routine measurements of TG and  
31 GGT concentrations, WC and BMI, showing an excellent discriminative ability to predict  
32 ultrasonographic NAFLD and hepatic steatosis in the general population.[23,30]  
33  
34  
35  
36  
37  
38  
39  
40  
41  
42  
43  
44  
45  
46  
47

48 The FLI has been reported to correlate with: 1) insulin resistance; 2) risk of  
49 coronary heart disease; 3) MetS; 4) early atherosclerosis; and 5) rates of non-hepatic-  
50 related morbidity and mortality in nondiabetic subjects.[31] Thus, FLI-diagnosed  
51 NAFLD may be an indicator of incident T2D.[19] Nonetheless, the risk of progression to  
52 T2D determined by FLI in patients with prediabetes remains poorly understood.  
53  
54  
55  
56  
57

58 Few studies have evaluated the influence of NAFLD as a risk factor for T2D  
59 development in a cohort of workers with prediabetes. Determining FLI in subjects with  
60

1  
2  
3 prediabetes may be highly relevant, as both epidemiological and clinical evidence have  
4 shown that primary health care prevention programs should target people at greater risk  
5 of developing T2D. The present study was therefore designed to evaluate the association  
6 between NAFLD, as estimated by FLI, and the development of T2D in a large cohort of  
7 South-European Mediterranean workers with prediabetes.  
8  
9  
10  
11  
12  
13  
14

## 15 **Methods**

### 16 **Study population and design**

17  
18  
19  
20  
21 This cohort study included 16,648 Spanish working adults with prediabetes who worked  
22 in public administration, construction, health departments or post offices. The study  
23 methods have been described in detail previously.[32] Briefly, participants were carefully  
24 chosen from 234,995 potentially eligible individuals who underwent periodic  
25 occupational health assessments between 2012 and 2013. Participants were included if  
26 they were aged 20–65 years and had an FPG of 100–125 mg/dL.[33] Subjects were  
27 excluded if they had a history of physician-diagnosed diabetes, had been treated with an  
28 oral antidiabetic agent or a systemic glucocorticoid, had an FPG  $\geq 126$  mg/dL or an  
29 HbA1c  $\geq 6.5\%$  at baseline, had received cancer treatment during the preceding 5 years,  
30 had anemia (hematocrit  $< 36\%$  in men and  $< 33\%$  in women) or were pregnant. All subjects  
31 underwent standard health examinations, anthropometric measurements, and metabolic  
32 tests at baseline and were followed up 5 years later, in 2017 and 2018.  
33  
34  
35  
36  
37  
38  
39  
40  
41  
42

43 All the procedures in the study protocol were in accordance with the Declaration  
44 of Helsinki for research on human participants and were approved by the Balearic Islands  
45 Ethical Committee of Clinical Research (Ref. No: CEI-IB-1887). All participants were  
46 carefully informed of the purpose and demands of the study. Informed consent was  
47 obtained from all participants included in the study.  
48  
49  
50  
51

### 52 **Patient and public involvement**

53  
54  
55 People were not involved in setting the research question nor in the study design.  
56 Participants were interviewed face to face by trained researchers for a detailed  
57 explanation of the purpose of this research and informed consent at the beginning. Results  
58 of the research will be disseminated to the participants.  
59  
60



## Data collection

At baseline, anthropometric measurements and fasting blood sample were taken from all subjects during occupational health examinations. A questionnaire was administered to collect data on sociodemographic characteristics, dietary habits, physical activity (PA) and clinical data. Participants were asked to report if they performed moderate and/or vigorous exercise (at least 150 min/week, according to World Health Organization [WHO] recommendations) and if they consumed fruits and vegetables daily. Each participant was also categorized as a current smoker (habitual or casual), former smoker, or never smoker, according to WHO criteria. Social class was defined using the Spanish Epidemiology Society classification, which is based on occupation, and it has shown high correlation with level of education.[34] Class I (upper class) includes executives, managers, and university professionals; Class II (middle class) includes intermediate occupations and employees; and Class III (lower class) includes manual workers.

All anthropometric measurements were made in the morning, after an overnight fast, at the same time and according to the guidelines and recommendations in the International Standards for Anthropometric Assessment (ISAK) manual.[35] All measurements were performed by well trained technicians or researchers to minimize coefficients of variation. Body weight was measured to the nearest 0.1 kg using an electronic scale (Seca 700 scale, Hamburg); height was measured to the nearest 0.5 cm using a stadiometer (Seca 220) Telescopic Height Rod for Column Scales, Hamburg); and BMI was calculated as weight (kg) divided by height (m) squared ( $\text{kg/m}^2$ ). Obesity was defined as  $\text{BMI} \geq 30.0 \text{ kg/m}^2$ , in agreement with WHO guidelines. Blood pressure was measured after a resting period of 10 minutes, with the subject in the supine position, using an electric and calibrated sphygmomanometer (OMRON M3, Healthcare Europe, Spain). Blood pressure in each subject was measured three times with a one-minute gap between measurements and their average was calculated.

Venous blood samples were taken from the antecubital vein of each subject in a sitting position, in the morning after a 12 h overnight fast. Blood samples were collected in suitable vacutainers without anticoagulant to obtain serum. Serum concentrations of glucose, TG and cholesterol were measured by standard procedures using a Beckman Coulter SYNCHRON CX® 9 PRO clinical system (La Brea, CA, USA).

The main outcome variable of the study was the time elapsed until T2D onset, defined as FPG  $\geq 126$  mg/dl,[36] or the time until initiation of anti-hyperglycemic medications for diabetes control in people with prediabetes during the follow-up period.

### **FLI as a surrogate measure of fatty liver**

The FLI was calculated based on measurements of TG, GGT, BMI and WC, using the formula[23]:

$$\text{Fatty Liver Index (FLI)} = e^y / (1 + e^y) \times 100$$

$$\text{Where } y = 0.953 \times \ln(\text{TG}) + 0.139 \times \text{BMI} + 0.718 \times \ln(\text{GGT}) + 0.053 \times \text{WC} - 15.745$$

Here, TG indicates triglyceride concentration, measured as mg/dl; BMI indicates body mass index, measured as kg/m<sup>2</sup>; GGT indicates  $\gamma$ -glutamyl transpeptidase, measured as U/l; and WC indicates waist circumference, measured as cm.

FLI, which ranges from 0 to 100, has shown good diagnostic accuracy in detecting fatty liver, with an Area Under the Curve (AUC) of 0.85 and a 95% confidence interval (CI) of 0.81–0.88.[19,23] FLI <30 was found to rule out steatosis with a sensitivity of 87% and a specificity of 64%, whereas FLI >60 was indicative of the presence of steatosis with a sensitivity of 61% and specificity of 86%.[23] FLI scores have been validated by comparison with the results of liver ultrasound and nuclear magnetic resonance spectroscopy. An FLI of 30–60 indicated indeterminate risk, in which fatty liver could not be ruled in or out.

### **Statistical analyses**

Continuous variables were expressed in means ( $\pm$ SDs) and compared by Student's t-test and one-way analysis of variance (ANOVA), with post-hoc Bonferroni contrast method. Categorical variables were expressed as n (%) and compared by chi-square ( $\chi^2$ ) tests with Bonferroni post-hoc method. Crude and multivariable Cox regression analyses were performed to calculate FLI, diet and PA hazard ratios (HR) for the development of diabetes, adjusting for potential confounders (age, social class, BMI, smoking, SBP, FPG) that showed significant association in univariate analysis. Schoenfeld residuals were used to check the proportional hazard assumption. For this analysis participants were classified into two categories: those with FLI >60 and FLI <60

1  
2  
3 All analyses were performed using the Statistical Package for the Social Sciences  
4 (SPSS) version 25.0 (IBM Company, New York, NY, USA) for Windows. All statistical  
5 tests were two-sided, and p values <0.05 were considered statistically significant.  
6  
7  
8  
9  
10  
11

## 12 **RESULTS**

13  
14 Baseline demographic and anthropometric characteristics of the study subjects by sex are  
15 shown in Table 1. The sample included 16,648 individuals with prediabetes, comprised  
16 of 12,080 (72.6%) men and 4,568 (27.4%) women, of mean age 44.81± 9.91 years. The  
17 prevalence of obesity in the entire sample was 26.9%. The percentage of men was  
18 significantly higher among subjects with than without NAFLD. There were also  
19 significant differences in all anthropometrical and biochemical parameters analyzed, with  
20 BMI, WC, TG, fasting plasma glucose (FPG), cholesterol, GGT and SBP and DBP being  
21 significantly higher in subjects with than without NAFLD. The percentages of subjects  
22 who performed at least 150 min per week of PA (4.3% vs. 61.8%; p<0.001) and who did  
23 not consume fruits and vegetables every day (12.0% vs. 56.4%; p<0.001) were  
24 significantly lower in subjects with than without NAFLD.  
25  
26  
27  
28  
29  
30  
31  
32  
33  
34  
35  
36  
37  
38  
39  
40  
41  
42  
43  
44  
45  
46  
47  
48  
49  
50  
51  
52  
53  
54  
55  
56  
57  
58  
59  
60

**Table 1** Basal anthropometric characteristics and biochemical parameters of subjects by sex

| Characteristics                    | All<br>(n = 16,648) | Men<br>(n = 12,080) | Women<br>(n= 4,568) | P value |
|------------------------------------|---------------------|---------------------|---------------------|---------|
| Age (years)                        | 44.51 ± 9.89        | 44.38 ± 9.87        | 44.84 ± 9.94        | < 0.01  |
| Social class                       |                     |                     |                     | <0.001  |
| I                                  | 741 (4.5%)          | 558 (4.6%)          | 183 (4.0%)          |         |
| II                                 | 2,779 (16.7%)       | 1,902 (15.7%)       | 877 (19.2%)         |         |
| III                                | 13,128 (78.9%)      | 9,620 (79.6%)       | 3,508 (76.8%)       |         |
| BMI (kg/m <sup>2</sup> )           | 27.66 ± 4.81        | 27.76 ± 4.47        | 27.42 ± 5.61        | < 0.001 |
| BMI categories                     |                     |                     |                     | < 0.001 |
| Normal weight                      | 5,049 (30.3%)       | 3,300 (27.3%)       | 1,749 (38.3%)       |         |
| Overweight                         | 7,120 (42.8%)       | 5,596 (46.3%)       | 1,524 (33.4%)       |         |
| Obese                              | 4,479 (26.9%)       | 3,184 (26.4%)       | 1,295 (28.3%)       |         |
| WC (cm)                            | 87.00 ± 9.95        | 90.28 ± 8.62        | 78.32 ± 7.78        | < 0.001 |
| Triglycerides (mg/dL)              | 137.66 ± 106.39     | 150.08 ±<br>117.11  | 104.81 ± 59.14      | < 0.001 |
| Glucose (mg/dL)                    | 106.22 ± 5.82       | 106.43 ± 5.90       | 105.68 ± 5.56       | < 0.001 |
| Cholesterol (mg/dL)                | 202.40 ± 38.09      | 202.49 ± 38.59      | 202.18 ± 36.74      | 0.642   |
| GGT (U/l)                          | 44.20 ± 55.68       | 48.03 ± 59.07       | 34.08 ± 33.69       | < 0.001 |
| SBP (mmHg)                         | 127.86 ± 16.74      | 130.16 ± 16.10      | 121.79 ± 16.88      | < 0.001 |
| DBP (mmHg)                         | 78.32 ± 11.01       | 79.51 ± 10.94       | 75.18 ± 10.58       | < 0.001 |
| PA (≥150 min/week)                 | 6,892 (41.4%)       | 4,787 (39.6%)       | 2,105 (46.1%)       | < 0.001 |
| Diet (daily fruits and vegetables) | 6,771 (40.7%)       | 4,654 (38.5%)       | 2,117 (46.3%)       | < 0.001 |
| Smoking habit                      |                     |                     |                     | < 0.001 |
| Never                              | 7,645 (45.9%)       | 5,124 (42.4%)       | 2,521 (55.2%)       |         |
| Former                             | 3,549 (21.3%)       | 2,750 (22.8%)       | 799 (17.5%)         |         |
| Current                            | 5,454 (32.8%)       | 4,206 (34.8%)       | 1,248 (27.3%)       |         |

Results are reported as mean ± SD or n (%). BMI, body mass index; WC, waist circumference; GGT,  $\gamma$ -glutamyl transpeptidase; SBP, systolic blood pressure; DBP, diastolic blood pressure PA, physical activity. Continuous variables were compared by Student's t-test, whereas categorical variables were compared by  $\chi^2$  tests.

General characteristics of the study population, such as anthropometric and biochemical data, are shown in Table 2, according to FLI categories. Data stratified by gender and FLI categories are shown in Table 3 for men and Table 4 for women. In both

men and women, those with FLI>60 presented a significantly worse anthropometric and biochemical profile, as compared with the other two groups.

Among men, 40.7% presented a FLI>60, 29.5% a FLI 30-60, and 29.8% a FLI <30. As compared to men in the other two categories, those with FLI>60 were older, more obese, and presented higher values of WC, triglycerides, glucose, cholesterol, GGT, SBP, and DBP (all  $p<0.001$ ). Men with FLI<30 consumed more fruits and vegetables daily, and dedicated more time to PA, than men with FLI>60 (all  $p<0.001$ ).

Table 2. Basal anthropometric characteristics and biochemical parameters of men and women according to FLI categories (n = 16,648).

| Characteristics          | FLI <30<br>n = 6,421<br>(29.8%)<br>(a) | FLI 30-60<br>n= 4,318<br>(29.5%)<br>(b) | FLI >60<br>n = 5,909<br>(40.7%)<br>(c) | P value | Post-hoc   |
|--------------------------|----------------------------------------|-----------------------------------------|----------------------------------------|---------|------------|
| Sex (Ref: Male)          | 3,605 (56.1%)                          | 3,558 (82.4)                            | 4,927 (83.2%)                          | 0.008   |            |
| Age (years)              | 42.35 ± 10.57                          | 45.34 ± 9.53                            | 46.32 ± 8.89                           | < 0.001 | a<b<c      |
| Social class             |                                        |                                         |                                        | 0.107   | NS         |
| I                        | 248 (4.4%)                             | 218 (5.0%)                              | 239 (4.0%)                             |         |            |
| II                       | 1,129 (17.6%)                          | 689 (16.0%)                             | 961 (16.3%)                            |         |            |
| III                      | 5,008 (78.0%)                          | 3,411 (79.0%)                           | 4,709 (79.6%)                          |         |            |
| BMI (kg/m <sup>2</sup> ) | 23.91 ± 2.61                           | 27.27 ± 2.39                            | 32.04 ± 4.39                           | < 0.001 | c<b<a      |
| BMI categories           |                                        |                                         |                                        | < 0.001 |            |
| Normal weight            | 4,340 (67.6%)                          | 626 (14.5%)                             | 83 (1.4%)                              |         | a>b,c; b>c |
| Overweight               | 2,014 (31.4%)                          | 3,218 (74.5%)                           | 1,888 (32.0%)                          |         | b>a,c; c>a |
| Obese                    | 67 (1%)                                | 474 (11.0%)                             | 4,479 (26.9%)                          |         | b>a; c>a,b |
| WC (cm)                  | 78.87 ± 7.06                           | 87.92 ± 6.55                            | 95.16 ± 7.34                           | < 0.001 | c>b>a      |
| Triglycerides<br>(mg/dL) | 87.52 ± 36.34                          | 129.90 ± 60.74                          | 197.81 ± 146.19                        | < 0.001 | c>b>a      |
| Glucose (mg/dL)          | 105.52 ± 5.28                          | 106.01 ± 5.65                           | 107.30 ± 6.32                          | < 0.001 | c>b>a      |
| Cholesterol<br>(mg/dL)   | 192.04 ± 35.64                         | 204.66 ± 36.98                          | 212.01 ± 38.69                         | < 0.0   | c>b>a      |
| GGT (UI/l)               | 21.35 ± 13.19                          | 39.22 ± 31.37                           | 72.68 ± 76.26                          | < 0.001 | c>b>a      |
| SBP (mmHg)               | 121.54 ± 15.31                         | 128.56 ± 15.01                          | 134.24± 16.91                          | < 0.001 | c>b>a      |
| DBP (mmHg)               | 74.22 ± 10.09                          | 78.72 ± 10.13                           | 82.50 ± 10.96                          | < 0.001 | c>b>a      |

|                                    |               |               |               |         |            |
|------------------------------------|---------------|---------------|---------------|---------|------------|
| PA ( $\geq 150$ min/week)          | 5,156 (80.3%) | 1,480 (34.3%) | 256 (4.3%)    | < 0.001 | a>b,c; b>c |
| Diet (daily fruits and vegetables) | 4,502 (66.5%) | 1,560 (23.0%) | 709 (12.0%)   | < 0.001 | a>b,c; b>c |
| Smoking habit                      |               |               |               | 0.930   | NS         |
| Never                              | 3,065 (42.7%) | 1,981 (45.9%) | 2,599 (44.0%) |         |            |
| Former                             | 1,077 (16.8%) | 953 (22.1%)   | 1,519 (5.7%)  |         |            |
| Current                            | 2,279 (35.5%) | 1,384 (32.1%) | 1,791 (30.3%) |         |            |

Table 3. Basal anthropometric characteristics and biochemical parameters of men according to FLI categories (n = 12,080).

| Men characteristics                | FLI <30<br>n = 3,605<br>(29.8%)<br>(a) | FLI 30-60<br>n = 3,558<br>(29.5%)<br>(b) | FLI >60<br>n = 4,917<br>(40.7%)<br>(c) | P value | Post-hoc   |
|------------------------------------|----------------------------------------|------------------------------------------|----------------------------------------|---------|------------|
| Age (years)                        | 41.02 $\pm$ 10.66                      | 45.08 $\pm$ 9.55                         | 46.34 $\pm$ 8.81                       | < 0.001 |            |
| Social class                       |                                        |                                          |                                        | 0.137   | NS         |
| I                                  | 153 (4.2%)                             | 191 (5.4%)                               | 214 (4.4%)                             |         |            |
| II                                 | 559 (15.5%)                            | 554 (15.6%)                              | 789 (16.0%)                            |         |            |
| III                                | 2,893 (80.2%)                          | 2,813 (79.1%)                            | 3,914 (79.6%)                          |         |            |
| BMI (kg/m <sup>2</sup> )           | 23.74 $\pm$ 2.24                       | 26.78 $\pm$ 2.02                         | 31.41 $\pm$ 4.09                       | < 0.001 | c<b<a      |
| BMI categories                     |                                        |                                          |                                        | < 0.001 |            |
| Normal weight                      | 2,616 (72.6%)                          | 603 (16.9%)                              | 81 (1.6%)                              |         | a>b,c; b>c |
| Overweight                         | 980 (27.2%)                            | 2,787 (78.3%)                            | 1,829 (37.2%)                          |         | b>a,c; c>a |
| Obese                              | 9 (0.2%)                               | 168 (4.7%)                               | 3,007 (61.2%)                          |         | b>a; c>a,b |
| WC (cm)                            | 82.67 $\pm$ 5.85                       | 89.13 $\pm$ 6.06                         | 96.68 $\pm$ 6.83                       | < 0.001 | c>b>a      |
| Triglycerides (mg/dL)              | 88.46 $\pm$ 37.22                      | 130.95 $\pm$ 60.70                       | 209.1-0 $\pm$ 153.25                   | < 0.001 | c>b>a      |
| Glucose (mg/dL)                    | 105.56 $\pm$ 5.36                      | 106.05 $\pm$ 5.63                        | 107.34 $\pm$ 6.34                      | < 0.001 | c>b>a      |
| Cholesterol (mg/dL)                | 187.32 $\pm$ 34.39                     | 203.72 $\pm$ 37.20                       | 212.71 $\pm$ 38.95                     | < 0.001 | c>b>a      |
| GGT (UI/l)                         | 23.02 $\pm$ 13.22                      | 38.89 $\pm$ 31.70                        | 72.98 $\pm$ 81.09                      | < 0.001 | c>b>a      |
| SBP (mmHg)                         | 124.08 $\pm$ 14.42                     | 129.23 $\pm$ 14.63                       | 135.30 $\pm$ 16.60                     | < 0.001 | c>b>a      |
| DBP (mmHg)                         | 74.98 $\pm$ 10.08                      | 79.03 $\pm$ 10.02                        | 83.18 $\pm$ 10.86                      | < 0.001 | c>b>a      |
| PA ( $\geq 150$ min/week)          | 3,108 (86.2%)                          | 1,425 (40.1%)                            | 254 (5.2%)                             | < 0.001 | a>b,c; b>c |
| Diet (daily fruits and vegetables) | 2,693 (74.7%)                          | 1,372 (38.6%)                            | 589 (12.0%)                            | < 0.001 | a>b,c; b>c |

| Smoking habit |               |               |               | < 0.001    |
|---------------|---------------|---------------|---------------|------------|
| Never         | 1,539 (42.7%) | 1,571 (44.2%) | 2,014 (41.0%) | b>c        |
| Former        | 620 (17.2%)   | 800 (22.5%)   | 1,330 (27.0%) | b>a; c>a,b |
| Current       | 1,446 (40.1%) | 1,187 (33.4%) | 1,573 (32.0%) | a>b,c      |

Results are reported as mean  $\pm$  SD or n (%). BMI, body mass index; WC, waist circumference; GGT,  $\gamma$ -glutamyl transpeptidase; SBP, systolic blood pressure; DBP, diastolic blood pressure PA, physical activity. Continuous variables were compared by ANOVA, whereas categorical variables were compared by  $\chi^2$  tests.

Among women, 21.7% had a FLI>60, 16.6% a FLI 30-60, and 61.7% a FLI<30. As compared to women in the other two categories, those with FLI>60 were more obese, and had worse anthropometric and biochemical values (WC, triglycerides, glucose, cholesterol, GGT, SBP, and DBP) (all  $p<0.001$ ). Women with FLI<30 also consumed more fruits and vegetables daily, and dedicated more time to PA, than women with FLI>60 (all  $p<0.001$ ).

Table 4. Anthropometric characteristics and biochemical parameters of women according to FLI categories (n = 4,568).

| Women characteristics    | FLI <30<br>n = 2,816<br>(61.7%)<br>(a) | FLI 30-60<br>n = 760<br>(16.6%)<br>(b) | FLI >60<br>n = 992<br>(21.7%)<br>(c) | P value | Post-hoc   |
|--------------------------|----------------------------------------|----------------------------------------|--------------------------------------|---------|------------|
| Age (years)              | 43.91 $\pm$ 10.22                      | 46.55 $\pm$ 9.31                       | 46.20 $\pm$ 9.28                     | < 0.001 | a<b,c      |
| Social class             |                                        |                                        |                                      | <0.01   |            |
| I                        | 131 (4.7%)                             | 27 (3.6%)                              | 25 (2.5%)                            |         | a>c        |
| II                       | 570 (20.2%)                            | 135 (17.8%)                            | 172 (17.3%)                          |         |            |
| III                      | 2,115 (75.1%)                          | 598 (78.7%)                            | 795 (80.1%)                          |         | c>a        |
| BMI (kg/m <sup>2</sup> ) | 24.13 $\pm$ 3.02                       | 29.56 $\pm$ 2.62                       | 35.12 $\pm$ 4.49                     | < 0.001 | c>b>a      |
| BMI categories           |                                        |                                        |                                      | < 0.001 |            |
| Normal weight            | 1,724 (61.2%)                          | 23 (3.0%)                              | 2 (0.2%)                             |         | a>b,c; b>c |
| Overweight               | 1,034 (36.7%)                          | 431 (56.7%)                            | 59 (5.9%)                            |         | a>c; b>a,c |
| Obese                    | 58 (2.1%)                              | 306 (40.3%)                            | 931 (93.9%)                          |         | b>a; c>a,b |
| WC (cm)                  | 74.00 $\pm$ 5.35                       | 82.22 $\pm$ 5.70                       | 87.63 $\pm$ 4.60                     | < 0.001 | c>b>a      |
| Triglycerides (mg/dL)    | 86.33 $\pm$ 35.15                      | 125.00 $\pm$ 60.71                     | 141.83 $\pm$ 84.45                   | < 0.001 | c>b>a      |
| Glucose (mg/dL)          | 105.13 $\pm$ 5.17                      | 105.84 $\pm$ 5.73                      | 107.12 $\pm$ 6.18                    | < 0.001 | c>b>a      |
| Cholesterol (mg/dL)      | 198.09 $\pm$ 36.29                     | 209.10 $\pm$ 35.61                     | 208.52 $\pm$ 37.20                   | < 0.001 | a<b,c      |



|                                    |                |                |                |         |            |
|------------------------------------|----------------|----------------|----------------|---------|------------|
| GGT (U/l)                          | 19.21 ± 12.83  | 40.74 ± 29.70  | 71.16 ± 45.26  | < 0.001 | c>b>a      |
| SBP (mmHg)                         | 118.28 ± 15.80 | 125.42 ± 16.34 | 128.98 ± 17.42 | < 0.001 | c>b>a      |
| DBP (mmHg)                         | 73.25 ± 10.02  | 77.25 ± 10.50  | 79.08 ± 10.82  | < 0.001 | c>b>a      |
| PA (≥150 min/week)                 | 2,048 (72.7%)  | 55 (7.2%)      | 2 (0.2%)       | < 0.001 | a>b,c; b>c |
| Diet (daily fruits and vegetables) | 1,809 (64.2%)  | 188 (24.7%)    | 120 (12.1%)    | < 0.001 | a>b,c; b>c |
| Smoking habit                      |                |                |                | < 0.001 |            |
| Never                              | 1,526 (54.2%)  | 410 (53.9%)    | 585 (59.0%)    |         | c>a        |
| Former                             | 457 (16.2%)    | 153 (20.1%)    | 189 (19.1%)    |         | b>a        |
| Current                            | 833 (29.6%)    | 197 (25.9%)    | 218 (22.0%)    |         | a>c        |

Results are reported as mean ± SD or n (%). BMI, body mass index; WC, waist circumference; GGT,  $\gamma$ -glutamyl transpeptidase; SBP, systolic blood pressure; DBP, diastolic blood pressure PA, physical activity. Continuous variables were compared by ANOVA, whereas categorical variables were compared by  $\chi^2$  tests.

Baseline FLI showed a significant correlation with FPG concentration at 5-year follow-up with a Pearson's correlation coefficient of 0.528 ( $p < 0.001$ ) (Figure 1).

### Figure 1 Correlation of Baseline FLI and FPG after 5 years of follow-up.

Of the 16,648 subjects with prediabetes, 3,706 (22.2%) progressed to T2D at 5 years, corresponding to an annual rate of 4.5%. The incidence of T2D after 5 years was similar between men (22.1%) and women (22.6%). When specifically looking at FLI categories, 0.2% (6/3,605) of men and 0.5% (13/2,816) of women in the low-risk group (FLI<30), progressed to T2D, corresponding to an annual rate of 0.04% for men and 0.1% for women. In the intermediate risk group (FLI 30-60), progression to T2D occurred in 4.3% (152/3,558) of men and 24.5% (186/760) in women, corresponding to an annual rate of 0.86% and 4.9%, respectively. Finally, in the high-risk group (FLI>60), incidence of T2D was 51.2% (2,516/4,917) in men and 84.0% (833/992) in women, corresponding to an annual rate of 11.34% and 16.8% respectively. Rates of progression to T2D in men and women according baseline FLI categories are shown in Figure 2.

### Figure 2 Incidence of T2D after 5-year follow-up according to baseline FLI classification.



In bivariate analysis (Table 5), high FLI (>60) was strongly associated with progression to T2D in both genders (HR=24.361; 95% CI 21.020 to 28.233 for men, and HR=17.816; 95% CI 15.400 to 20.611 for women), as were age, social class, BMI, smoking habits, FPG and SBP. An adjusted cox regression model showed that high FLI scores (>60) remained independently associated with progression to T2D, (adjusted HR=6.879; 95% CI 5.873 to 8.057 for men, and HR=5.806; 95% CI 4.863 to 6.932 for women). BMI was also associated to progression to T2D in both genders after adjustment (HR=1.041; 95% CI 1.036 to 1.045 for men, and HR=1.104; 95% CI 1.036 to 1.045 for women). Some of the evaluated factors also remained significant after adjustment. Performing at least 150 min/week of physical activity (adjusted HR=0.215; 95% CI 0.173 to 0.268 for men, and HR=0.070; 95% CI 0.043 to 0.112 for women) was significantly protective against progression to T2D in both genders. Current male smokers were also less likely to progress to T2D (adjusted HR=0.909; 95% CI 0.834 to 0.991).

Table 5. Hazard Ratios for progression from prediabetes to T2D

| Variables                          | HR <sub>crude</sub> (95% CI)    |                                 |                                 | HR <sub>adjusted</sub> (95% CI) |                              |                              |
|------------------------------------|---------------------------------|---------------------------------|---------------------------------|---------------------------------|------------------------------|------------------------------|
|                                    | Men                             | Women                           | All subjects                    | Men                             | Women                        | All subjects                 |
| Age                                | <b>1.054 (1.051 – 1.058)</b>    | <b>1.035 (1.030 – 1.050)</b>    | <b>1.042 (1.040 - 1.054)</b>    | <b>1.041 (1.036 - 1.045)</b>    | <b>1.018 (1.011 – 1.026)</b> | <b>1.029 (1.024 - 1.036)</b> |
| Social class (Ref: I)              |                                 |                                 |                                 |                                 |                              |                              |
| II                                 | <b>1.147 (0.984 – 1.338)</b>    | <b>1.475 (1.102 – 1.974)</b>    | <b>1.331 (1.043 - 1.656)</b>    | 1.009 (0.839 – 1.212)           | 1.216 (0.818 – 1.809)        | 1.113 (0.826 - 1.511)        |
| III                                | 1.087 (0.994 – 1.251)           | <b>1.845 (1.402 – 2.428)</b>    | <b>1.446 (1.198 - 1.840)</b>    | 1.005 (0.851 - 1.186)           | 1.170 (0.793 – 1.140)        | 1.088 (0.822 - 1.163)        |
| PA (≥150 min/week)                 | <b>0.037 (0.031 – 0.046)</b>    | <b>0.027 (0.019 – 0.038)</b>    | <b>0.032 (0.025 - 0.042)</b>    | <b>0.215 (0.173 - 0.268)</b>    | <b>0.070 (0.043 - 0.112)</b> | <b>0.143 (0.108 - 0.190)</b> |
| Diet (daily fruits and vegetables) | <b>0.126 (0.112 – 0.142)</b>    | <b>0.141 (0.120 – 0.166)</b>    | <b>0.134 (0.116 - 0.154)</b>    | 0.959 (0.843 – 1.091)           | 0.951 (0.793 – 1.140)        | 0.955 (0.818 - 1.116)        |
| Smoking habits (Ref: never smoker) |                                 |                                 |                                 |                                 |                              |                              |
| Former                             | <b>1.244 (1.153 – 1.343)</b>    | <b>1.010 (0.875 – 1.165)</b>    | <b>1.749 (1.014 - 1.254)</b>    | 0.985 (0.904 – 1.072)           | 1.017 (0.873 – 1.184)        | 1.046 (1.340 - 1.128)        |
| Current                            | <b>0.770 (0.719 – 0.824)</b>    | <b>0.714 (0.633 – 0.804)</b>    | <b>0.742 (0.676 - 0.814)</b>    | <b>0.909 (0.834 - 0.991)</b>    | 0.959 (0.830 – 1.107)        | 0.934 (0.832 - 1.049)        |
| BMI                                | <b>1.174 (1.170 – 1.178)</b>    | <b>1.161 (1.154 – 1.167)</b>    | <b>1.168 (1.162 - 1.172)</b>    | <b>1.041 (1.036 - 1.045)</b>    | <b>1.104 (1.101 – 1.107)</b> | <b>1.073 (1.069 - 1.076)</b> |
| SBP                                | <b>1.023 (1.021 – 1.024)</b>    | <b>1.023 (1.021 – 1.025)</b>    | <b>1.023 (1.021 – 1.025)</b>    | 0.999 (0.996 - 1.001)           | 1.001 (0.997 – 1.004)        | 1.000 (0.997 - 1.003)        |
| FPG                                | <b>1.037 (1.034 – 1.039)</b>    | <b>1.027 (1.023 – 1.030)</b>    | <b>1.032 (1.029 - 1.035)</b>    | <b>1.021 (1.018 – 1.024)</b>    | <b>1.018 (1.013 – 1.023)</b> | <b>1.020 (1.016 - 1.024)</b> |
| FLI (Ref: FLI < 60)                |                                 |                                 |                                 |                                 |                              |                              |
| FLI >60                            | <b>24.361 (21.020 – 28.233)</b> | <b>17.816 (15.400 – 20.611)</b> | <b>21.089 (18.210 - 24.422)</b> | <b>6.879 (5.873 – 8.057)</b>    | <b>5.806 (4.863 – 6.932)</b> | <b>6.343 (5.368 - 7.495)</b> |

PA, physical activity; BMI, body mass index; SBP, systolic blood pressure; FLI, fatty liver index; FPG, fasting plasma glucose.

## DISCUSSION

The present study aimed to evaluate the possible association between hepatic steatosis, as estimated by FLI, and T2D progression in a large and representative sample of Mediterranean workers with prediabetes. The main finding of the study was that FLI was a strong independent risk factor for the progression of T2D, in both men and women with baseline prediabetes, after a 5-year follow-up. Moreover, FLI could preventively identify subjects at high risk of progression to T2D. Other risk factor associated with progression T2D were older age, male sex, higher BMI, higher FPG, low consumption of fruits and vegetables, and performing less than 150 min/week of PA.

The results of the present study are in accordance with previous evidence reporting that NAFLD is a strong predictor of T2D in subjects with prediabetes [37,14]. The baseline prevalence of hepatic steatosis (i.e. FLI>60) in our study population was 35.4%, higher than the 19.3% reported in a Japanese study,[37] lower than the 55.7% observed in the PREDAPS study,[14] and closer to the 22–40% reported by studies using ultrasonography-diagnosed NAFLD.[38,39]

Patients with a higher FLI score, independently of gender, presented a higher BMI, a worse cardiometabolic profile and less healthy lifestyle habits. Previous studies [40] similarly observed that patients with FLI>60 were more metabolically impaired compared to patients with lower FLI, they also presented a higher risk for MetS, as well as worse lipid profile. [41] Accordingly, the degree of liver fat content correlates with MetS components,[42] and that this correlation may be due to NAFLD and T2D sharing a series of common physiopathological pathways.[43,44]

At five-year follow-up, nearly one in four individuals (22.2%) with prediabetes progressed to T2D resulting in an annual rate of progression of 4.5%. In comparison, the French IT-DIAB study,[45] a 5-year, prospective observational study reported an annual progression rate of 7.1%. The study also reported that FLI could predict the risk of progressing to T2D as well as the possibility of reverting to normoglycemia in clinical practice, independently of classical glucose parameters.[46] Moreover, normalization of glycemia was higher in subjects with FLI <30 than in those with higher FLI scores. The incidence of T2D observed in our study was higher than in previous ones[47–49] probably due to differences in sociodemographic characteristics between study populations. The ARIC study,[47] which reported an annual progression rate to T2D of 2.3%, included a higher percentage of women than in our cohort, whereas the ELSA-

1  
2  
3 Brasil study,[49] which found that the annual progression rate to T2D was 3.5%, included  
4 a higher percentage of subjects with high educational level. On the other hand, the  
5 PREDAPS study[50] showed a similar annual conversion rate (4.2%). The incidence rate  
6 of T2D in our sample was lower than that shown (5.8%) in a previous Korean study [51]  
7 of 7,680 subjects who had undergone general routine health evaluations. Nevertheless,  
8 similar to what was observed in our study, 65.5% of the Korean subjects were men, and  
9 male sex was a risk factor for development of T2D in patients with prediabetes.

10  
11  
12  
13  
14  
15 When stratifying for gender, the proportion of women in the FLI >60 category  
16 who progressed to T2D was significantly higher (80%) than the proportion of men in the  
17 same category (50%), at 5-year follow-up. Although women are generally less likely to  
18 suffer from hepatic steatosis,[52] once they do, they might present a higher risk of  
19 developing T2D than males [53]. Genetic predisposition and epigenetic mechanisms,  
20 nutritional components and lifestyle exert effects differently in both sexes. Furthermore,  
21 sexual hormones directly impact on energy metabolism, body composition, inflammatory  
22 cascades and vascular functioning. Particularly, low levels of 17 $\beta$ -estradiol are associated  
23 with increased risk of T2D, independently of established risk factors, including BMI and  
24 insulin resistance.[54] Thus, endocrine imbalances might relate to unfavorable  
25 cardiometabolic traits observable in female sex.[55]

26  
27  
28  
29  
30  
31  
32  
33  
34 Of note, results from our study show an apparently protective effect of smoking  
35 on progression to diabetes. However this could be due to the anorexigenic effect of  
36 tobacco, more than tobacco consumption itself. Smokers are generally leaner than  
37 average as nicotine may affect energy homeostasis and food consumption at brain  
38 level.[56] Accordingly, the proportion of smokers with a lower FLI was higher than that  
39 of smokers in the other two categories.

40  
41  
42  
43  
44  
45  
46  
47  
48  
49  
50  
51  
52  
53  
54  
55  
56  
57  
58  
59  
60  
The FLI could be utilized in primary care as a practical tool for early detection of  
NAFLD in subjects with prediabetes, while predicting their risk of developing T2D.[57]  
This would benefit patients at greater risk, allowing more careful monitoring and  
providing an opportunity for early interventions to prevent and reduce both the  
progression of hepatic disease and T2D. The present study also highlights the importance  
of weight control, promotion of PA and of fruits and vegetables consumption in the  
prevention of T2D progression. Determining lifestyle-related factors, particularly PA,  
together with repeated anthropometrical measurements in subjects with prediabetes may  
be crucial in properly assessing the risks of progression to T2D and of cardiovascular  
events.[58]

### **Strengths and limitations**

This study had some limitations. First, this work incorporated data from periodic health assessments performed in the workplace. None of these subjects underwent oral glucose tolerance tests (OGTT), which is considered more sensitive but slightly less specific than FPG for identifying people at risk of developing T2D.[59] However, the low reproducibility, high cost, and prolonged time required for this test have limited its use in clinical practice.[60] Secondly, possible misclassification bias could have occurred as subjects were categorized as having prediabetes based on a single FPG sample, thus limiting the possibility to account for intra-individual variability and increasing the possibility of a regression-toward-the-mean effect, possibly affecting the progression rate. Thirdly, diet and PA were only evaluated at baseline, thus lifestyles changes were not recorded during follow-up, possibly resulting in misclassification bias. Moreover, specific separate information on fruits and vegetable consumption could not be assessed, thus limiting the possibility of studying the confounding effect of excessive fruit consumption on NAFLD risk. Finally, we cannot discard the effect of job-related confounders such as job stress or the healthy worker effect. The main strengths of this study were the large sample size (16,648 subjects) and the relatively long follow-up period. Study participants had multiple occupations and were from several geographical locations, suggesting that the study population was representative of the Spanish workforce, although, our results are not applicable to the general population.

### **Clinical implications**

This study highlights the importance of FLI as an easily calculated and valuable early indicator for high risk of T2D in subjects with prediabetes. FLI-based screening could allow the adoption of effective measures to prevent and reduce the progression of NAFLD. The workplace could be a feasible setting for implementing diabetes prevention programs based on early detection and lifestyle changes.

### **CONCLUSION**

Because of the progressive nature of NAFLD and the risk of serious consequences, health care providers should be strongly advised to screen routinely for NAFLD in all subjects with prediabetes or at risk of T2D. Fatty liver indices are simple clinical tools for

1  
2  
3 evaluating the extent of liver fat and are predictive of incident diabetes. Concretely, the  
4 FLI is a simple, effective and practical method of stratifying the risk of conversion to  
5 T2D based on the degree of hepatic steatosis. FLI may be useful in routine clinical  
6 practice as an additional screening tool to identify subjects with prediabetes who are at  
7 high risk of progression and could benefit from early interventions. Identification of  
8 subjects who could benefit from preventive strategies represents an opportunity to assist  
9 vulnerable individuals to understand their health risks and encourage them to adopt  
10 preventive behaviors.  
11  
12  
13  
14  
15  
16

17 The workplace may be a feasible setting for the assessment of risk factors,  
18 allowing early detection of NAFLD in younger subjects with prediabetes who are likely  
19 to progress to T2D and the implementation of T2D prevention programs.  
20  
21  
22  
23  
24  
25

## 26 REFERENCES

- 27 1 Younossi ZM, Marchesini G, Pinto-Cortez H, *et al.* Epidemiology of Nonalcoholic Fatty  
28 Liver Disease and Nonalcoholic Steatohepatitis: Implications for Liver Transplantation.  
29 *Transplantation* 2019;**103**:22–7. doi:10.1097/TP.0000000000002484  
30  
31
- 32 2 Cobbina E, Akhlaghi F. Non-alcoholic fatty liver disease (NAFLD)–pathogenesis,  
33 classification, and effect on drug metabolizing enzymes and transporters. *Drug Metab*  
34 *Rev* 2017;**49**:197–211. doi:10.1080/03602532.2017.1293683  
35  
36
- 37 3 Bellentani S. The epidemiology of non-alcoholic fatty liver disease. *Liver Int*  
38 2017;**37**:81–4. doi:10.1111/liv.13299  
39
- 40 4 Alisi A, Manco M, Panera N, *et al.* Association between type two diabetes and non-  
41 alcoholic fatty liver disease in youth. *Ann Hepatol* 2009;**8**:44–50. doi:10.1016/s1665-  
42 2681(19)31826-5  
43  
44
- 45 5 Anstee QM, Targher G, Day CP. Progression of NAFLD to diabetes mellitus,  
46 cardiovascular disease or cirrhosis. *Nat Rev Gastroenterol Hepatol* 2013;**10**:330–44.  
47 doi:10.1038/nrgastro.2013.41  
48
- 49 6 Williams KH, Shackel NA, Gorrell MD, *et al.* Diabetes and nonalcoholic fatty liver  
50 disease: A pathogenic duo. *Endocr Rev* 2013;**34**:84–129. doi:10.1210/er.2012-1009  
51  
52
- 53 7 Herbert Tilg AIM and MR. NAFLD and diabetes mellitus Herbert. *Nat Rev |*  
54 *Gastroenterol Hepatol* © 2017.  
55
- 56 8 Fujii H, Kawada N. The role of insulin resistance and diabetes in nonalcoholic fatty liver  
57 disease. *Int J Mol Sci* 2020;**21**. doi:10.3390/ijms21113863  
58
- 59 9 Parry SA, Hodson L. Managing NAFLD in Type 2 Diabetes: The Effect of Lifestyle  
60

- Interventions, a Narrative Review. *Adv Ther* 2020;**37**:1381–406. doi:10.1007/s12325-020-01281-6
- 10 Xia MF, Bian H, Gao X. NAFLD and Diabetes: Two Sides of the Same Coin? Rationale for Gene-Based Personalized NAFLD Treatment. *Front Pharmacol* 2019;**10**:1–11. doi:10.3389/fphar.2019.00877
- 11 Kashanian S, Fuchs M. Non-Alcoholic Fatty Liver Disease in Patients with Diabetes Mellitus: A Clinician’s Perspective. *Int J Dig Dis* 2015;**01**:1–9. doi:10.4172/2472-1891.100010
- 12 Friedman SL, Neuschwander-Tetri BA, Rinella M, *et al.* *Mechanisms of NAFLD development and therapeutic strategies*. 2018. doi:10.1038/s41591-018-0104-9
- 13 Tana C, Ballestri S, Ricci F, *et al.* Cardiovascular Risk in Non-Alcoholic Fatty Liver Disease : Mechanisms and Therapeutic Implications. *Int J Environ Res Public Health* 2019;**16**:3104.10.3390/ijerph16173104
- 14 Franch-Nadal J, Caballeria L, Mata-Cases M, *et al.* Fatty liver index is a predictor of incident diabetes in patients with prediabetes: The PREDAPS study. *PLoS One* 2018;**13**:1–17. doi:10.1371/journal.pone.0198327
- 15 Caballería L, Antonia MA, Torán P, *et al.* Prevalence and factors associated with the presence of non alcoholic fatty liver disease in an apparently healthy adult population in primary care units. *BMC Gastroenterol* 2007;**7**:1–6. doi:10.1186/1471-230X-7-41
- 16 Hazlehurst JM, Woods C, Marjot T, *et al.* Non-alcoholic fatty liver disease and diabetes. *Metabolism* 2016;**65**:1096–108. doi:10.1016/j.metabol.2016.01.001
- 17 Falguera M, Vilanova MB, Alcubierre N, *et al.* Prevalence of pre-diabetes and undiagnosed diabetes in the Mollerussa prospective observational cohort study rural area of Catalonia in a semi- rural area of catalonia. *BMJ Open* 2019;**10**:1–9. doi:10.1136/bmjopen-2019-033332
- 18 Sanyal AJ. Past, present and future perspectives in nonalcoholic fatty liver disease. *Nat Rev Gastroenterol Hepatol* 2019;**16**:377–86. doi:10.1038/s41575-019-0144-8
- 19 Jäger S, Jacobs S, Kröger J, *et al.* Association between the fatty liver index and risk of type 2 diabetes in the EPIC-Potsdam study. *PLoS One* 2015;**10**:1–14. doi:10.1371/journal.pone.0124749
- 20 Anstee QM, Targher G, Day CP. Progression of NAFLD to diabetes mellitus, cardiovascular disease or cirrhosis. *Nat Rev Gastroenterol Hepatol* 2013;**10**:330–44. doi:10.1038/nrgastro.2013.41
- 21 Wieckowska A, Feldstein AE. Diagnosis of nonalcoholic fatty liver disease: Invasive versus noninvasive. *Semin Liver Dis* 2008;**28**:386–95. doi:10.1055/s-0028-1091983
- 22 Papagianni M, Sofogianni A, Tziomalos K. Non-invasive methods for the diagnosis of nonalcoholic fatty liver disease. *World J Hepatol* 2015;**7**:638–48.



- 1  
2  
3 doi:10.4254/wjh.v7.i4.638  
4  
5 23 Bedogni G, Bellentani S, Miglioli L, *et al.* The fatty liver index: A simple and accurate  
6 predictor of hepatic steatosis in the general population. *BMC Gastroenterol* 2006;**6**:1–7.  
7  
8 doi:10.1186/1471-230X-6-33  
9  
10 24 Dyson JK, Anstee QM, McPherson S. Non-alcoholic fatty liver disease: a practical  
11 approach to diagnosis and staging. *Frontline Gastroenterol* 2014;**5**:211–8.  
12  
13 doi:10.1136/flgastro-2013-100403  
14  
15 25 Lee JH, Kim D, Kim HJ, *et al.* Hepatic steatosis index: A simple screening tool  
16 reflecting nonalcoholic fatty liver disease. *Dig Liver Dis* 2010;**42**:503–8.  
17  
18 doi:10.1016/j.dld.2009.08.002  
19  
20 26 Wang J, Li P, Jiang Z, *et al.* Diagnostic value of alcoholic liver disease (ALD)/  
21 nonalcoholic fatty liver disease (NAFLD) index combined with  $\gamma$ -glutamyl transferase in  
22 differentiating ALD and NAFLD. *Korean J Intern Med* 2016;**31**:479–87.  
23  
24 doi:10.3904/kjim.2015.253  
25  
26 27 Rotter I, Rył A, Szylińska A, *et al.* Lipid Accumulation Product (LAP) as an Index of  
27 Metabolic and Hormonal Disorders in Aging Men. *Exp Clin Endocrinol Diabetes*  
28 2017;**125**:176–82. doi:10.1055/s-0042-116071  
29  
30 28 Poynard T, Lassailly G, Diaz E, *et al.* Performance of biomarkers FibroTest, ActiTest,  
31 SteatoTest, and NashTest in patients with severe obesity: Meta analysis of individual  
32 patient data. *PLoS One* 2012;**7**:1–8. doi:10.1371/journal.pone.0030325  
33  
34 29 Ayensa-vazquez JA, Leiva A, Tauler P, *et al.* Agreement between Type 2 Diabetes Risk  
35 Scales in a Caucasian Population : A Systematic Review and Report. *J Clin Med*  
36 2020;**9**:1–19.  
37  
38 30 Calori G, Lattuada G, Ragogna F, *et al.* Fatty liver index and mortality: The cremona  
39 study in the 15th year of follow-up. *Hepatology* 2011;**54**:145–52. doi:10.1002/hep.24356  
40  
41 31 Zhou K, Cen J. The fatty liver index (FLI) and incident hypertension: A longitudinal  
42 study among Chinese population. *Lipids Health Dis* 2018;**17**:1–7. doi:10.1186/s12944-  
43 018-0858-6  
44  
45 32 Bennasar-Veny M, Fresneda S, López-González A, *et al.* Lifestyle and Progression to  
46 Type 2 Diabetes in a Cohort of Workers with Prediabetes. *Nutrients* 2020;**12**:1–13.  
47  
48 doi:10.3390/nu12051538  
49  
50 33 American Diabetes Association, Association AD. 1. American Diabetes Association.  
51 Diagnosis and Classification of Diabetes Mellitus. *Diabetes Care* [Internet]. 2012 Jan 1  
52 [cited 2018 Jan 25];**35**(Supplement\_1):S64–71. Available from:  
53 <http://www.ncbi.nlm.nih.gov/pubmed/22187472>Diagnosis and Classification. *Diabetes*  
54 *Care* 2012;**35**:64–71. doi:10.2337/dc12-s064  
55  
56 34 Domingo-Salvany A, Bacigalupe A, Carrasco JM, *et al.* Propuestas de clase social

- 1  
2  
3 neoweberiana y neomarxista a partir de la Clasificación Nacional de Ocupaciones 2011.  
4 *Gac Sanit* 2013;**27**:263–72. doi:10.1016/j.gaceta.2012.12.009
- 5  
6 35 Stewart A, Marfell-Jones M, Olds T de RH. *International standards for anthropometric*  
7 *assessment. ISAK*. 3rd ed. Lower Hutt, New Zealand: 2011.
- 8  
9 36 Care D, Suppl SS. Classification and diagnosis of diabetes: Standards of medical care in  
10 diabetes-2021. *Diabetes Care* 2021;**44**:S15–33. doi:10.2337/dc21-S002
- 11  
12 37 Nishi T, Babazono A, Maeda T, *et al*. Evaluation of the fatty liver index as a predictor  
13 for the development of diabetes among insurance beneficiaries with prediabetes. *J*  
14 *Diabetes Investig* 2015;**6**:309–16. doi:10.1111/jdi.12290
- 15  
16 38 Bae JC, Rhee EJ, Lee WY, *et al*. Combined effect of nonalcoholic fatty liver disease and  
17 impaired fasting glucose on the development of type 2 diabetes: A 4-year retrospective  
18 longitudinal study. *Diabetes Care* 2011;**34**:727–9. doi:10.2337/dc10-1991
- 19  
20 39 Wong VWS, Hui AY, Tsang SWC, *et al*. Prevalence of undiagnosed diabetes and  
21 postchallenge hyperglycaemia in Chinese patients with non-alcoholic fatty liver disease.  
22 *Aliment Pharmacol Ther* 2006;**24**:1215–22. doi:10.1111/j.1365-2036.2006.03112.x
- 23  
24 40 Leutner M, Göbl C, Schlager O, *et al*. The Fatty Liver Index (FLI) Relates to Diabetes-  
25 Specific Parameters and an Adverse Lipid Profile in a Cohort of Nondiabetic,  
26 Dyslipidemic Patients. *J Am Coll Nutr* 2017;**36**:287–94.  
27 doi:10.1080/07315724.2016.1262802
- 28  
29 41 Rogulj D, Konjevoda P, Milić M, *et al*. Fatty liver index as an indicator of metabolic  
30 syndrome. *Clin Biochem* 2012;**45**:68–71. doi:10.1016/j.clinbiochem.2011.10.014
- 31  
32 42 Lonardo A, Ballestri S, Marchesini G, *et al*. Nonalcoholic fatty liver disease: A  
33 precursor of the metabolic syndrome. *Dig Liver Dis* 2015;**47**:181–90.  
34 doi:10.1016/j.dld.2014.09.020
- 35  
36 43 Saponaro C, Gaggini M, Gastaldelli A. Nonalcoholic Fatty Liver Disease and Type 2  
37 Diabetes: Common Pathophysiologic Mechanisms. *Curr Diab Rep* 2015;**15**:1–13.  
38 doi:10.1007/s11892-015-0607-4
- 39  
40 44 Forlani G, Giorda C, Manti R, *et al*. The Burden of NAFLD and Its Characteristics in a  
41 Nationwide Population with Type 2 Diabetes. *J Diabetes Res* 2016;**1**:1–9.  
42 doi:10.1155/2016/2931985
- 43  
44 45 Wargny M, Smati S, Pichelin M, *et al*. Fatty liver index is a strong predictor of changes  
45 in glycemic status in people with prediabetes: The IT-DIAB study. *PLoS One*  
46 2019;**14**:1–14. doi:10.1371/journal.pone.0221524
- 47  
48 46 Carla Busquets-Cortés, Miquel Bennasar-Veny, Ángel Arturo López- Gonzá, Sergio  
49 Fresneda, Manuela Abbate AMY. Utility of Fatty Liver Index to predict reversion to  
50 normoglycemia in people with prediabetes. *PLoS One* 2021;**16**:1–12.  
51 doi:10.1371/journal.pone.0249221
- 52  
53  
54  
55  
56  
57  
58  
59  
60



- 1  
2  
3 47 Selvin E, Steffes MW, Gregg E, *et al.* Performance of A1C for the classification and  
4 prediction of diabetes. *Diabetes Care* 2011;**34**:84–9. doi:10.2337/dc10-1235  
5  
6 48 Giráldez-García C, María Hernández A, Gamarra J, *et al.* Evolución de pacientes con  
7 prediabetes en Atención Primaria de Salud (PREDAPS): resultados del quinto año de  
8 seguimiento. *Diabetes Práctica* 2018;**09**:37–80.  
9  
10 doi:10.26322/2013.7923.1505400455.03  
11  
12 49 Schmidt MI, Bracco PA, Yudkin JS, *et al.* Intermediate hyperglycaemia to predict  
13 progression to type 2 diabetes (ELSA-Brasil): an occupational cohort study in Brazil.  
14 *Lancet Diabetes Endocrinol* 2019;**7**:267–77. doi:10.1016/S2213-8587(19)30058-0  
15  
16 50 Giráldez-García C, García-Soidán FJ, Serrano Martín R, *et al.* Evolución de pacientes  
17 con prediabetes en Atención Primaria de Salud (PREDAPS): resultados del primer año  
18 de seguimiento. *Diabetes Práctica* 2014;**05**:1–48.  
19  
20  
21  
22 51 Jung CH, Lee WJ, Hwang JY, *et al.* Assessment of the fatty liver index as an indicator of  
23 hepatic steatosis for predicting incident diabetes independently of insulin resistance in a  
24 korean population. *Diabet Med* 2013;**30**:428–35. doi:10.1111/dme.12104  
25  
26 52 Ballestri S, Nascimbeni F, Baldelli E, *et al.* NAFLD as a Sexual Dimorphic Disease:  
27 Role of Gender and Reproductive Status in the Development and Progression of  
28 Nonalcoholic Fatty Liver Disease and Inherent Cardiovascular Risk. *Adv Ther*  
29 2017;**34**:1291–326. doi:10.1007/s12325-017-0556-1  
30  
31 53 Tokita Y, Maejima Y, Shimomura K, *et al.* Non-alcoholic fatty liver disease is a risk  
32 factor for type 2 diabetes in middle-aged Japanese men and women. *Intern Med*  
33 2017;**56**:763–71. doi:10.2169/internalmedicine.56.7115  
34  
35 54 Mauvais-Jarvis F. Is estradiol a biomarker of type 2 diabetes risk in postmenopausal  
36 women? *Diabetes* 2017;**66**:568–70. doi:10.2337/dbi16-0063  
37  
38 55 Kautzky-Willer A, Harreiter J, Pacini G. Sex and gender differences in risk,  
39 pathophysiology and complications of type 2 diabetes mellitus. *Endocr Rev*  
40 2016;**37**:278–316. doi:10.1210/er.2015-1137  
41  
42 56 Andrea Stojakovic, Emma P. Espinosa OTF and KL. Effects of nicotine on homeostatic  
43 and hedonic components of food intake. *J Endocrinol* 2017;**235**:R13–R31.  
44  
45 doi:doi:10.1530/JOE-17-0166.  
46  
47 57 Ciardullo S, Muraca E, Perra S, *et al.* Screening for non-alcoholic fatty liver disease in  
48 type 2 diabetes using non-invasive scores and association with diabetic complications.  
49 *BMJ Open Diabetes Res Care* 2020;**8**:1–9. doi:10.1136/bmjdr-2019-000904  
50  
51 58 Vistisen D, Witte DR, Brunner EJ, *et al.* Risk of cardiovascular disease and death in  
52 individuals with prediabetes defined by different criteria: The whitehall II study.  
53 *Diabetes Care* 2018;**41**:899–906. doi:10.2337/dc17-2530  
54  
55 59 Unwin N, Shaw J, Zimmet P, *et al.* Impaired glucose tolerance and impaired fasting  
56  
57  
58  
59

glycaemia: the current status on definition and intervention. *Diabet Med* 2002;**19**:708–23. doi:10.1046/j.1464-5491.2002.00835.x

- 60 Clark Perry R, Ravi Shankar R, Fineberg N, *et al*. HbA1c measurement improves the detection of type 2 diabetes in high-risk individuals with nondiagnostic levels of fasting plasma glucose: The early diabetes intervention program (EDIP). *Diabetes Care* 2001;**24**:465–71. doi:10.2337/diacare.24.3.465

**Acknowledgements** The authors are grateful to the field staff and participants of this study.

**Contributors** CB, MBV, AL, AA and AMY were responsible for the conception and design of the study. AL, SF and AA acquired the data, supervised the study and had full access to all study data. CB, MBV and AMY analyzed and interpreted the data and drafted the manuscript. SF, AL and AA participated in critical revision of the manuscript for important intellectual content. All authors read and approved the final version of the manuscript.

**Funding** This project was funded by the Carlos III Health Institute (Ministry of Economy and Competitiveness, Spain) through the Network for Prevention and Health Promotion in Primary Care (redIAPP, RD16/0007/008), and by European Union ERDF funds.

**Competing interests** The authors declare that there are no competing interests.

**Data sharing statement** Data are available upon reasonable request. Readers may contact Dr. Arturo Lopez (angarturo@gmail.com) regarding the data. No additional data are available.

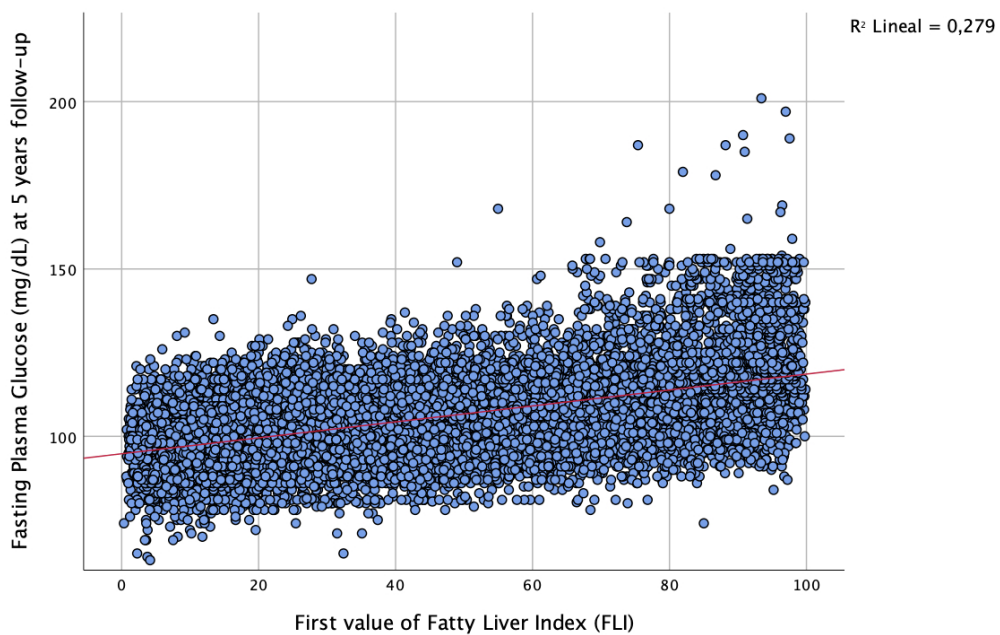

Figure 1

393x253mm (72 x 72 DPI)

1  
2  
3  
4  
5  
6  
7  
8  
9  
10  
11  
12  
13  
14  
15  
16  
17  
18  
19  
20  
21  
22  
23  
24  
25  
26  
27  
28  
29  
30  
31  
32  
33  
34  
35  
36  
37  
38  
39  
40  
41  
42  
43  
44  
45  
46  
47  
48  
49  
50  
51  
52  
53  
54  
55  
56  
57  
58  
59  
60

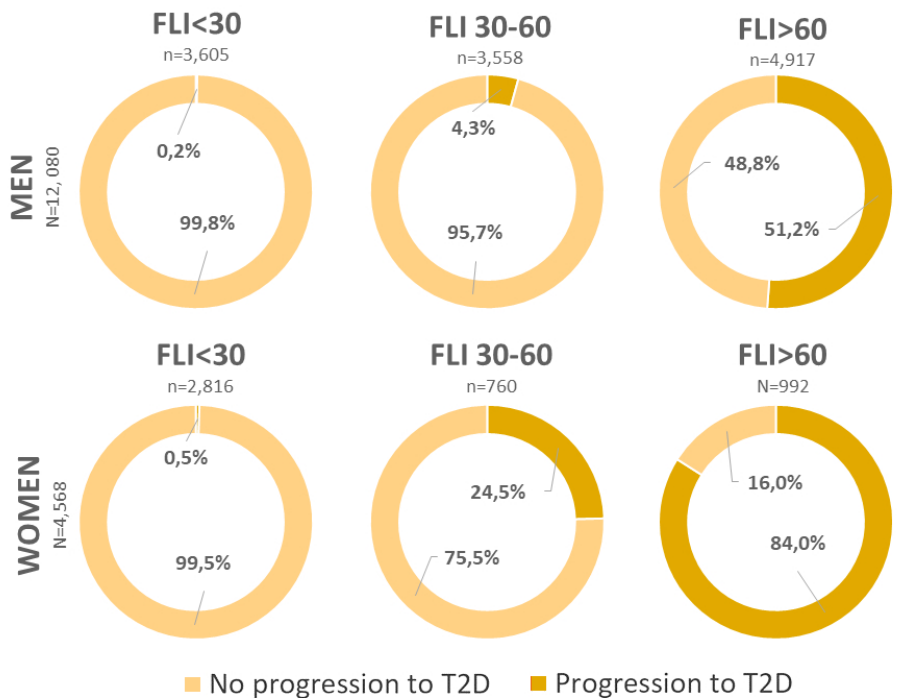

Figure 2  
254x190mm (96 x 96 DPI)

STROBE Statement—Checklist of items that should be included in reports of *cohort studies*

|                              | Item No | Recommendation                                                                                                                                                                                                                                                                                                         | Page No |
|------------------------------|---------|------------------------------------------------------------------------------------------------------------------------------------------------------------------------------------------------------------------------------------------------------------------------------------------------------------------------|---------|
| <b>Title and abstract</b>    | 1       | (a) Indicate the study's design with a commonly used term in the title or the abstract<br>(b) Provide in the abstract an informative and balanced summary of what was done and what was found                                                                                                                          | 1-2     |
| <b>Introduction</b>          |         |                                                                                                                                                                                                                                                                                                                        |         |
| Background/rationale         | 2       | Explain the scientific background and rationale for the investigation being reported                                                                                                                                                                                                                                   | 3-4     |
| Objectives                   | 3       | State specific objectives, including any prespecified hypotheses                                                                                                                                                                                                                                                       | 4       |
| <b>Methods</b>               |         |                                                                                                                                                                                                                                                                                                                        |         |
| Study design                 | 4       | Present key elements of study design early in the paper                                                                                                                                                                                                                                                                | 4       |
| Setting                      | 5       | Describe the setting, locations, and relevant dates, including periods of recruitment, exposure, follow-up, and data collection                                                                                                                                                                                        | 4-5     |
| Participants                 | 6       | (a) Give the eligibility criteria, and the sources and methods of selection of participants. Describe methods of follow-up<br>(b) For matched studies, give matching criteria and number of exposed and unexposed                                                                                                      | 4       |
| Variables                    | 7       | Clearly define all outcomes, exposures, predictors, potential confounders, and effect modifiers. Give diagnostic criteria, if applicable                                                                                                                                                                               | 6-7     |
| Data sources/<br>measurement | 8*      | For each variable of interest, give sources of data and details of methods of assessment (measurement). Describe comparability of assessment methods if there is more than one group                                                                                                                                   | 6-7     |
| Bias                         | 9       | Describe any efforts to address potential sources of bias                                                                                                                                                                                                                                                              | 14      |
| Study size                   | 10      | Explain how the study size was arrived at                                                                                                                                                                                                                                                                              | -       |
| Quantitative variables       | 11      | Explain how quantitative variables were handled in the analyses. If applicable, describe which groupings were chosen and why                                                                                                                                                                                           |         |
| Statistical methods          | 12      | (a) Describe all statistical methods, including those used to control for confounding<br>(b) Describe any methods used to examine subgroups and interactions<br>(c) Explain how missing data were addressed<br>(d) If applicable, explain how loss to follow-up was addressed<br>(e) Describe any sensitivity analyses | 7       |
| <b>Results</b>               |         |                                                                                                                                                                                                                                                                                                                        |         |
| Participants                 | 13*     | (a) Report numbers of individuals at each stage of study—eg numbers potentially eligible, examined for eligibility, confirmed eligible, included in the study, completing follow-up, and analysed<br>(b) Give reasons for non-participation at each stage<br>(c) Consider use of a flow diagram                        | 8       |
| Descriptive data             | 14*     | (a) Give characteristics of study participants (eg demographic, clinical, social) and information on exposures and potential confounders<br>(b) Indicate number of participants with missing data for each variable of interest<br>(c) Summarise follow-up time (eg, average and total amount)                         | 9       |
| Outcome data                 | 15*     | Report numbers of outcome events or summary measures over time                                                                                                                                                                                                                                                         | -       |

|    |                          |    |                                                                                                                                                                                                              |       |
|----|--------------------------|----|--------------------------------------------------------------------------------------------------------------------------------------------------------------------------------------------------------------|-------|
| 1  | Main results             | 16 | (a) Give unadjusted estimates and, if applicable, confounder-adjusted estimates and their precision (eg, 95% confidence interval). Make clear which confounders were adjusted for and why they were included | 10-11 |
| 2  |                          |    | (b) Report category boundaries when continuous variables were categorized                                                                                                                                    |       |
| 3  |                          |    | (c) If relevant, consider translating estimates of relative risk into absolute risk for a meaningful time period                                                                                             |       |
| 4  |                          |    |                                                                                                                                                                                                              |       |
| 5  |                          |    |                                                                                                                                                                                                              |       |
| 6  |                          |    |                                                                                                                                                                                                              |       |
| 7  |                          |    |                                                                                                                                                                                                              |       |
| 8  |                          |    |                                                                                                                                                                                                              |       |
| 9  | Other analyses           | 17 | Report other analyses done—eg analyses of subgroups and interactions, and sensitivity analyses                                                                                                               | -     |
| 10 |                          |    |                                                                                                                                                                                                              |       |
| 11 | <b>Discussion</b>        |    |                                                                                                                                                                                                              |       |
| 12 |                          |    |                                                                                                                                                                                                              |       |
| 13 | Key results              | 18 | Summarise key results with reference to study objectives                                                                                                                                                     | 12    |
| 14 | Limitations              | 19 | Discuss limitations of the study, taking into account sources of potential bias or imprecision. Discuss both direction and magnitude of any potential bias                                                   | 14    |
| 15 |                          |    |                                                                                                                                                                                                              |       |
| 16 | Interpretation           | 20 | Give a cautious overall interpretation of results considering objectives, limitations, multiplicity of analyses, results from similar studies, and other relevant evidence                                   | 12-14 |
| 17 |                          |    |                                                                                                                                                                                                              |       |
| 18 |                          |    |                                                                                                                                                                                                              |       |
| 19 | Generalisability         | 21 | Discuss the generalisability (external validity) of the study results                                                                                                                                        | 14    |
| 20 |                          |    |                                                                                                                                                                                                              |       |
| 21 | <b>Other information</b> |    |                                                                                                                                                                                                              |       |
| 22 | Funding                  | 22 | Give the source of funding and the role of the funders for the present study and, if applicable, for the original study on which the present article is based                                                | 19    |
| 23 |                          |    |                                                                                                                                                                                                              |       |
| 24 |                          |    |                                                                                                                                                                                                              |       |

25  
26 \*Give information separately for exposed and unexposed groups.

27  
28 **Note:** An Explanation and Elaboration article discusses each checklist item and gives methodological background and  
29 published examples of transparent reporting. The STROBE checklist is best used in conjunction with this article (freely  
30 available on the Web sites of PLoS Medicine at <http://www.plosmedicine.org/>, Annals of Internal Medicine at  
31 <http://www.annals.org/>, and Epidemiology at <http://www.epidem.com/>). Information on the STROBE Initiative is  
32 available at <http://www.strobe-statement.org>.  
33  
34  
35  
36  
37  
38  
39  
40  
41  
42  
43  
44  
45  
46  
47  
48  
49  
50  
51  
52  
53  
54  
55  
56  
57  
58  
59  
60
